# Supplementary material for: Description and evaluation of the process-based forest model 4C at four European forest sites
Source: Copernicus journal article supplement (doi:10.5194/gmd-2019-2), 2019-01-15
Supplement: Supplementary file [file gmd-2019-2-AC1-supplement.zip]

# Description and evaluation of the process-based forest model 4C v2.2 at four European forest sites

Petra Lasch-Born<sup>1</sup>, Felicitas Suckow<sup>1</sup>, Christopher O. P. Reyer<sup>1</sup>, Martin Gutsch<sup>1</sup>, Chris Kollas<sup>1,2</sup>, Franz-Werner Badeck<sup>3</sup>, Harald K. M. Bugmann<sup>4</sup>, Rüdiger Grote<sup>5</sup>, Cornelia Fürstenau<sup>6</sup>, Marcus Lindner<sup>7</sup>, Jörg Schaber<sup>8</sup>

<sup>1</sup>Potsdam Institute for Climate Impact Research (PIK), Member of the Leibniz Association, P.O. Box 60 12 03, D-14412 Potsdam, Germany

<sup>2</sup>German Federal Institute for Risk Assessment, Unit 43: Epidemiology, Zoonoses and Antimicrobial Resistance, Department Biological Safety, Max-Dohrn-Straße 8-10, D-10589 Berlin, Germany

<sup>3</sup>Research Centre for Genomics and Bioinformatics, Council for Agricultural Research and Economics, via S. Protaso, 302, I -29017 Fiorenzuola d'Arda PC, Italy

<sup>4</sup>Forest Ecology, Department of Environmental Systems Science, ETH Zürich, Universitätstrasse 16, 8092 Zürich, Switzerland

<sup>5</sup>Karlsruhe Institute of Technology (KIT), Institute of Meteorology and Climate Research (IMK-IFU), Kreuzeckbahnstr. 19, 82467 Garmisch-Partenkirchen, Germany;

<sup>6</sup>Friedrich-Schiller-Universität Jena, Institut für Informatik, Heinz Nixdorf Chair for Distributed Information Systems, Ernst-Abbe-Platz 1-4, D07743 Jena, Germany

<sup>7</sup>European Forest Institute, Resilience Programme, Platz der Vereinten Nationen 7, D-53113 Bonn, Germany

<sup>8</sup>EXCO GmbH, Adam-Opel-Str- 9-11, D-67227 Frankenthal, Germany

Correspondence: Petra Lasch-Born (lasch@pik-potsdam.de)

**Abstract.** The process-based model 4C (FORESEE) has been developed over the past twenty years to study climate impacts on forests. The objective of this paper is to give a comprehensive description of the main features of 4C and to present an evaluation of the model at four different forest sites across Europe. The evaluation was focused on growth parameters, carbon, water and heat fluxes. The main data source for the evaluation was the PROFOUND database. We applied different statistical metrics of evaluation and compared the inter-annual and inter-monthly variability of observed and simulated carbon (net ecosystem exchange, gross primary production) and water (actual evapotranspiration,) fluxes. The ability to reproduce forest growth (stem diameter and biomass) differs from site to site and is best for the pine stand site Peitz (ME=0.98). The dynamics in simulating carbon and water fluxes are well captured on daily and monthly time scales ( $0.51 < ME < 0.983$ ) but less so on annual time scale ( $ME < 0$ ). This model data mismatch is possibly due to processes that are missing or represented in a very general way in 4C but not with enough specific detail to cover strong, site specific dependencies such as the dynamics of non-structural carbohydrates (NSC) and ground vegetation growth. These processes need to be further elaborated for general forest growth investigations under climate change. Overall, 4C has shown a great potential for improvement since it emphasizes the representation of boundary conditions such as soil temperature at different depths. Therefore, a finer differentiation of processes such as organ-specific respiration should easily be accomplished. Nonetheless, by using the PROFOUND database we were able to demonstrate the applicability and reliability of 4C.

## 1 Introduction

Forest modelling has a long tradition in forest science and ecology, and is of central importance to understanding forest functioning and dynamics, but also for planning forest management and assessing forest product and service provisioning (Pretzsch, 2010). While climate change has often put emphasis on long-term forest developments, nowadays the changing variability of environmental conditions has provoked a wider interest in the sustainability of various ecosystem services from current forests. There is also an increasing demand for estimating the sensitivity of forests to disturbance events as well as the mitigation options of management. This makes it necessary to account for a high degree of complexity in forest ecosystems and thus demand forest models that can capture numerous interactions between air, soil and vegetation. For this reason, stand-scale process-based forest models (PBM) have been developed over the past 30 years that try to explain forest growth and development based on an ecological understanding (Fontes et al., 2010; Landsberg, 2003; Mäkelä et al., 2000a; Medlyn et al., 2011). Many of these models were developed to study climate change impacts on forest productivity (see review by Reyer (2015)) or matter dynamics (water, carbon, nitrogen) (Cameron et al., 2013; Constable and Friend, 2000; Kramer et al., 2002), or the effects of forest management (Fontes et al., 2010; Porte and Bartelink, 2002; Pretzsch et al., 2008) or natural disturbances (Seidl et al., 2011) on forests. One such model is the forest model “FORESt Ecosystems in a changing Environment”, in short ‘FORESEE’ and even shorter ‘4C’, developed at the Potsdam Institute for Climate Impact Research in Germany.

The development of the forest model 4C started in the 1990s (Bugmann et al., 1997), at a time when environmental change, and especially climate change, had been hypothesized to provoke major changes in forest ecosystems that could not be covered by traditional statistics-based forest models. The main idea was to develop a forest model that describes individual forest stands and has the following characteristics:

- represents our knowledge of the main mechanisms of forest functioning such as photosynthesis, allocation, water relations etc. (i.e. is process-based)
- is responsive to changing environmental conditions
- is generic in its structure
- is applicable to forests world-wide
- respects the principle of parsimony (a minimum number of parameters that need to be estimated for each species).

The model’s objectives include scenario analyses regarding (i) Impacts of climate change including other changing environmental conditions (e.g., CO<sub>2</sub>, N-deposition) on forest growth and matter balance (carbon, water, nitrogen), (ii) Effects of forest management on forest ecosystem functioning, and (iii) Impacts of biotic disturbances.

The concept underlying 4C and its salient features were outlined by Bugmann et al. (1997) and partly by Lasch et al. (2002), Lasch et al. (2005) and Reyer et al. (2010). Here, we present the model in more detail and illustrate these outlined features with examples of model runs compared with observed data using the PROFOUND database (Reyer et al. (in preparation), Reyer et al. (2019)) see also <http://cost-profound.eu/site/outcomes/data/>.

The objectives of this paper are:

- (1) To provide a comprehensive description of the structure and the processes of 4C v2.2 (Lasch-Born et al., 2019)

- (2) To evaluate the model's performance in reproducing growth and carbon and water fluxes as well as soil temperature and water content for typical European forest stands
- (3) To discuss the general applicability of the model and to highlight potential future improvements.

## 2 Methods

### 2.1 Model 4C

In the following we briefly present the main features of the process-based forest model 4C. More details on all processes, state variables and parameterization are given in the very extensive model description (Lasch-Born et al., 2018) and also on the website: <http://www.pik-potsdam.de/4c/>.

#### 2.1.1 Overview

4C describes tree species composition, forest growth and structure as well as the whole carbon, water, and nitrogen balance of a forest stand on an area basis. It can be applied for patches of various sizes (varying from 100 m<sup>2</sup> to several hectares) and mono-and mixed-species forests. The model mechanistically describes forest responses to climate, nitrogen, and CO<sub>2</sub>, and accounts for realistic representation of forest management (Bugmann et al., 1997; Lasch et al., 2005). A forest stand is represented by a number of tree cohorts, each of which with a specific number of trees. All trees within a cohort share the same characteristics which are species, age, tree dimensions (height, height of crown base (or bole height), and diameter at breast height), biomass differentiated into various compartments (foliage, fine roots, sapwood, and heartwood) and stage of phenological development. This allows simulating a representative tree of each cohort instead of each tree of the stand. The model is distance independent and so the trees within a cohort are horizontally evenly distributed and their position unknown. There are no differences in the growth behaviour of the trees of a cohort and there is no competition between the trees within a cohort. In contrast, the tree cohorts compete for light, water and nutrients. Their relative success in this competition determines their performance in terms of growth and mortality. Establishment of new cohorts is simulated with a regeneration module. The vertical structure of crown space and rooting zone is represented by a resolution into vertical layers. The model requires the following input data: daily meteorological data, a detailed description of the physical and chemical characteristics of each soil layer and an initialization of cohort properties (see section 2.1.4).

Different time scales are used for the sub-models, ranging from a daily time step for e.g. soil water dynamics, phenology, and for photosynthesis (based on weekly averaged daily climate data), to an annual time step for tree carbon allocation, dimensional growth and mortality (Fig. 1). For several key processes, 4C provides alternative descriptions to enable an uncertainty analysis across different model assumptions or for selecting processes at different levels of detail depending on data availability for parametrization or stand initialization. For example, evapotranspiration can be calculated using approaches by Turc and Ivanov (Dyck and Peschke, 1995; DVWK, 1996), Penman-Monteith (Monteith and Unsworth, 1990), or Priestley-Taylor (Priestley and Taylor, 1972). Each of these process descriptions is suited for different applications. The Turc-Ivanov procedure is a simple estimate which requires the least input data whereas Penman-Monteith uses a full range of meteorological variables and is based on physical knowledge which allows for more precise estimates of evapotranspiration (Kingston et al.,



Prentice (1996b) and Haxeltine and Prentice (1996a)). The competition of cohorts for water and nutrients is modelled via absorption of water and nitrogen by the fine roots in proportion to the fine root mass of the individual cohorts in a specific soil layer. Water limitation of photosynthesis is calculated per cohort by the ratio of cohort water supply and cohort transpiration demand. Nitrogen limitation is described as a function of the C/N ratio of the soil and the species-specific photosynthesis response to nitrogen. Elevated CO<sub>2</sub> affects photosynthesis by an increase of the internal partial pressure of CO<sub>2</sub> which increases light-use efficiency and gross assimilation and reduces stomatal conductance as well as the potential water demand for transpiration. Therefore, water-use efficiency is increased with increasing CO<sub>2</sub> (Haxeltine and Prentice, 1996a). The total tree, cohort and stand respiration is calculated as a constant annual fraction of gross primary productivity (GPP) as proposed by Landsberg and Waring (1997). Therefore, the net primary production (NPP) is also a constant fraction of GPP (Waring et al., 1998). The allocation of annual net primary productivity to different tree organs (sapwood, heartwood, foliage, and fine root biomass) and dimensional tree growth is modelled by combining the pipe model theory (Shinozaki et al., 1964), the functional balance hypothesis (Davidson, 1969), and ideas presented by Mäkelä (1990) to make the model sensitive to resource availability and varying demand with increasing dimensions. Height growth is coupled to the growth of the foliage mass and depends on the shading of the crown (Reyer et al., 2010). The diameter is calculated annually after allocation of NPP and height growth using the sapwood and heartwood area and the length of sapwood pipes. For more details see Lasch-Born et al. (2018).

#### 2.1.2.4 Mortality and senescence

Cohort mortality is described on an annual time scale and two kinds of mortality are considered. The so-called 'age related' mortality is based on tree life span and corresponds to the intrinsic mortality described by Botkin (1993). In addition, the reduction of the number of trees due to limitation of resources and resulting growth suppression is described as carbon-based stress mortality according to Keane et al. (1996). If a tree cohort is not able to reproduce foliage biomass losses within a year, this period counts as a stress year. Successive stress years increase the probability of mortality. Stress-related mortality is species-specific, since the sensitivity to stress years is directly related to the parametrized shade tolerance (see Lasch-Born et al. (2018)) of a tree species as well as the abundances of disturbances (see chapter 2.1.2.9), see also Lasch-Born et al. (2018). Both types of mortality can be combined or applied separately. Additionally, tree mortality can be superimposed by prescribed mortality events originating from thinning or harvests (see also chapter 2.1.2.7)

Annual senescence rates for the biomass compartments foliage, fine roots and sapwood of a cohort are species-specific and calculated from the corresponding fixed parameterized relative senescence rates. They deliver the litter input to the soil and the transformation of sapwood in heartwood.

#### 2.1.2.5 Water balance

The following processes are considered for the calculation of the water balance: interception of precipitation, actual evapotranspiration, percolation and snowmelt. Intercepted water of the canopy as well as the ground vegetation is calculated depending on the leaf area and a species-specific interception capacity (Jansson, 1991). The potential evapotranspiration (PET) that is needed to define the evaporation demand of the forest stand is calculated by approaches of Turc and Ivanov from air temperature and global radiation or relative humidity, respectively (Dyck and Peschke, 1995; DVWK, 1996; Lasch-Born et al., 2015). Further approaches (i.e. Penman-Monteith, Priestley-Taylor) can be selected and are described in more detail in Lasch-Born et al. (2018). The potential evapotranspiration limits the evaporation demand of intercepted and soil water as well as the

transpiration of trees and ground vegetation. The actual water uptake of each cohort depends on its transpiration demand and the available water in the soil layers which is proportional to its relative share of fine roots in each soil layer. Snowmelt is estimated from the actual air temperature greater than a threshold temperature with a linear approach suggested by Koitzsch and Günther (1990).

#### **2.1.2.6 Soil physics, carbon and nitrogen**

The transport of heat and water in a multi-layered soil is explicitly calculated, as well as carbon and nitrogen dynamics based on the decomposition and mineralisation of organic matter (Grote and Suckow, 1998; Grote et al., 1998; Kartschall et al., 1990). The soil of a forest stand is divided into different layers with optional thickness defined based on the horizons of the soil profile. Each layer, the humus layer as well as the deeper mineral layers, is assumed to be homogeneous concerning its physical parameters. Water content and soil temperature of each soil layer are estimated as functions of soil parameters, air temperature, and stand precipitation. They control the decomposition and mineralisation of organic matter. The carbon and nitrogen dynamics are driven by the litter input which is separated into five fractions for each species (stems, twigs and branches, foliage, fine roots, and coarse roots). The turnover of all litter fractions and of the soil organic matter compartment is described as a first order reaction (Grote and Suckow, 1998; Post et al., 2007). These processes are controlled by matter- and species-specific reaction coefficients and modified by soil moisture, temperature and pH value. For more details see Lasch-Born et al. (2018).

#### **2.1.2.7 Management**

4C simulates management of mono- and mixed-species forests automatically based on rules that are selected by the user. For this purpose, a variety of management routines are implemented to mimic thinning, harvesting and planting. Thinning is defined mainly by intensity, given by a fixed portion of biomass or stem number removed per year, and type such as thinning from above or below realized by means of stochastic approaches based on a Weibull distribution applied to the cohorts, similar to Lindner (2000); for more details see Lasch-Born et al. (2018).

Planting of seedlings includes the generation of a variety of seedling cohorts of a specific tree species differing in height and number of seedlings. Further seedling characteristics (e.g. biomass and height) are derived from empirical relationships available in the literature (Hauskeller-Bullerjahn, 1997; Schall, 1998; Van Hees, 1997) which are also used for seedling growth. If the height of a seedling cohort exceeds a threshold value, the entire cohort is then transformed into a regular tree cohort. 4C allows the management of short rotation coppices with Aspen and Black locust, see Lasch-Born et al. (2018).

#### **2.1.2.8 Wood product model and socio-economic analysis**

A wood product model (WPM) is integrated in 4C. It is based on a concept introduced by Karjalainen et al. (1994) and further developed by Eggers (2002). The WPM simulates carbon pools and fluxes in the forest sector. The parameters are based on aggregated values of the German timber market reports, available regional data and parameters according to Eggers (2002). The WPM allows the grading of the harvested and standing timber, the processing of the timber and allocation of timber to wood products, and includes the retention period of timber in the final products and later on in landfills. Finally, a socio economic analysis tool (SEA) (Fürstenau et al., 2007) calculates costs, revenues and subsidies of forest management and furthermore the net present value (NPV) and the liquidation value of the standing stock (Fig. 2), see Lasch-Born et al. (2018)

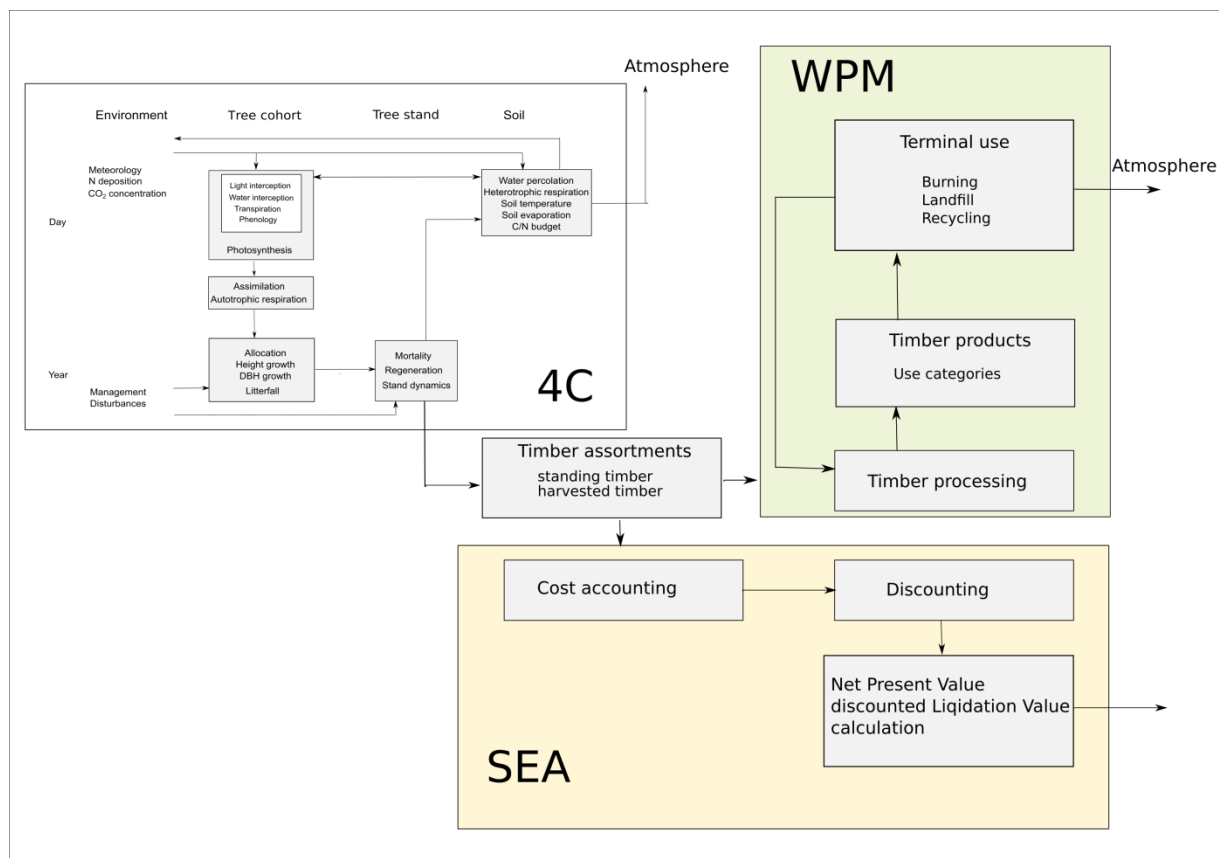

**Figure 2. Model framework 4C (as presented in Fig. 1) coupled with the Wood Product Model (WPM) and Socio-economic Analysis-tool (SEA) (Eggers, 2002; Fürstenau et al., 2007).**

#### 2.1.2.9 Disturbances

The implementation of biotic disturbances follows a specific framework of modelling functional groups of biotic agents (defoliator, root disturber, stem rot, xylem clogger, and phloem feeder) proposed by Dietze and Matthes (2014). In this framework, insects and pathogens are clustered upon their damaging action and abstracted on the level of functional groups. In addition, we also implemented growth and impacts of the hemiparasitic European mistletoe (*Viscum album* L.) (Kollas et al., 2018) (Table 1).

**Table 1 Six functional groups which are currently implemented in 4C with their corresponding impacts in the model.**

| Functional group | Impact in 4C                                    |
|------------------|-------------------------------------------------|
| Defoliator       | Foliage loss                                    |
| Xylem clogger    | Reduction in water supply rate                  |
| Phloem feeder    | Carbon loss                                     |
| Root disturber   | Fine root loss                                  |
| Stem rot         | Increase in tree mortality                      |
| Mistletoe        | Increase of tree transpiration, and carbon loss |



The occurrence of a disturbance has to be given externally as an input time series. If a disturbance occurs, the corresponding effect is simulated (e.g. defoliator implies reduction of foliage biomass of between 0% and 100%), which then exerts its influence on the affected processes within 4C.

Only in the case of simulations with disturbances, a NSC-pool (non-structural carbohydrates including starch and sugars) of the trees is activated and the carbon amount for the allocation will be enhanced by carbon from the NSC-pool as a C-reserve of the tree. The NSC-pool is assumed to be located in the biomass compartments sapwood, branch/twigs wood, and coarse root wood, which means that the maximum size of the NSC-pools is defined relative to the biomass of the corresponding compartments (differentiated for coniferous and deciduous trees and based on data reported by Hoch et al. (2003)). The surplus of carbon for allocation into damaged tissues is only available at the end of the disturbance year, while refilling of the NSC-pool can continue for many years until the pool's maximum size is reached. For more details see Lasch-Born et al. (2018).

### 2.1.3 Tree species parameterization

4C is parameterized for the most common European tree species: Common beech (*Fagus sylvatica* L.), Norway spruce (*Picea abies* L. Karst.), Scots pine (*Pinus sylvestris* L.), oaks (*Quercus robur* L., and *Quercus petraea* Liebl.), and birch (*Betula pendula* Roth). In addition, parameters for some species that are considered favourable under expected environmental changes or that are used for short-rotation coppices have also been tested and are readily applicable. The considered species include Douglas-fir (*Pseudotsuga menziesii* (Mirb.) Franco), Black locust (*Robinia pseudoacacia* L.), Aleppo pine (*Pinus halepensis* Mill.), eucalypts (*Eucalyptus globulus* Labill. and *Eucalyptus grandis* W. Hill ex Maiden) and poplars (*Populus tremula* (L.), *P. tremuloides* (Michx.)). Moreover, parameter sets for Ponderosa pine (*Pinus ponderosa* Dougl.) and Lodgepole pine (*Pinus contorta* Dougl.) exist but have not been properly tested. The oak, eucalypt and poplar parameters are derived from investigations of two species of the same genus each and are assumed to be valid for both. Besides these tree species, 4C is also parameterized for the hemiparasitic plant Mistletoe (*Viscum album* subsp. *austriacum*) and a generic grassy ground vegetation based on properties of *Calamagrostis arundinacea*. For each species, a full set of parameters comprises about 95 individual values. Some parameters do not differ across species yet, but can be potentially selected if scientific evidence becomes available. Due to the possibility of using different process descriptions for the same process in the 4C model framework (e.g. phenology) the actual number of parameters used in each simulation may vary (for the values of the parameters see Lasch-Born et al. (2018)).

In many cases, different physiological parameters have been determined in different environments (Kattge et al., 2011), or are dependent on stand density or site fertility (e.g. (Berninger et al., 2005)). To account for these findings, the philosophy of 4C is to assume that species-specific parameters are genetically defined but that important tree traits (e.g. leaf area or actual electron transport capacity) can be described by acclimation processes to specific environmental conditions. Covering the most important of such processes, one parameter set for each species can be chosen that reproduces species' growth, water and carbon cycling under a wide range of evolutionary constraints. Calibration of the parameters is therefore not usually carried out when setting up the model for a new site. However, in recent studies, 4C has also been calibrated using a Bayesian framework (van Oijen et al., 2013; Reyer et al., 2016).



#### 2.1.4 Input data needs

The model requires daily meteorological data (temperature, precipitation, relative humidity, air pressure, wind velocity and global radiation). Furthermore, annual CO<sub>2</sub> concentration and nitrogen deposition are necessary inputs. Values for annual CO<sub>2</sub> concentration can be selected from internally integrated data sources (measurements: Mauna Loa, Dr. Pieter Tans, NOAA/ESRL ([www.esrl.noaa.gov/gmd/ccgg/trends/](http://www.esrl.noaa.gov/gmd/ccgg/trends/)) and Dr. Ralph Keeling, Scripps Institution of Oceanography ([scrippsco2.ucsd.edu/](http://scrippsco2.ucsd.edu/)), scenarios: RCP: Meinshausen et al. (2011), SRES: Nakicenovic (2000)).

The information about the forest can be provided at two levels of detail: At the stand level, average values of diameter at breast height (DBH), height, stem number or basal area, age and species type are needed. From these data tree cohorts are generated using distribution functions. The cohorts together represent these average values. At tree level, individual tree measurements (DBH, height, height of the crown base, species and age) are needed and used to aggregate cohort data. The individual tree data are better suited for initializing 4C because the cohorts can be estimated more realistically from individual tree data.

The description of the soil layers follows the soil horizons. At least the thickness and texture of the horizons are required as well as their carbon and nitrogen content. Further important variables are pH, bulk density, pore volume, field capacity, and wilting point. If the last three entries are missing, they can also be estimated via pedotransfer functions from texture (Russ and Riek, 2011; Wösten et al., 2001).

#### 2.2 Previous model evaluations and applications

Since the first applications of 4C, tests, evaluations and model comparisons have been carried out for various forest stands and different processes within 4C (Table 2). The evaluations find 4C applicable to a wide range of environmental conditions and research questions but also highlight deficits. Using these previous evaluations in combination with the detailed results from the selected forest sites of this study, we will draw conclusions for further model development and improvement in the Discussion section.

The earlier applications of the model covered a wide range of research questions and issues. Most relevant objectives were (i) carbon and water balance of forests under climate change, (ii) analysis of adaptive management under climate change, (iii) risks and benefits of climate change in forestry, (iv) energy potentials from forestry and short rotation coppices, (v) economic analysis of management units under climate change. A more detailed overview is given in the Supplement (Table S1).

305

306 **Table 2 Overview of studies in which different species, processes and variables of 4C were evaluated (DBH- diameter**  
 307 **at breast height, H height, N- stem number, AET-actual evapotranspiration, NPP- net primary production, NEE- net**  
 308 **ecosystem exchange, TER-total ecosystem respiration, GPP-gross primary production)**

| <b>Process<br/>(variables)</b>                                        | <b>Validation<br/>data</b>                                                                | <b>Site</b>                                                                                            | <b>Species</b>                        | <b>Results</b>                                                                                                                                                                                                                                                        | <b>Publication</b>                 |
|-----------------------------------------------------------------------|-------------------------------------------------------------------------------------------|--------------------------------------------------------------------------------------------------------|---------------------------------------|-----------------------------------------------------------------------------------------------------------------------------------------------------------------------------------------------------------------------------------------------------------------------|------------------------------------|
| Growth (DBH, H, stem volume, N)                                       | Long-term permanent plot measurements; Evaluation using volume growth and survival graphs | Evo (Finland), Fabrikschleichach (Germany)                                                             | Scots pine, beech                     | Satisfactory results for volume growth in tree size classes; underestimation of height growth; underestimation of growth of smaller tree cohorts; overestimation of mortality of smaller tree cohorts;                                                                | Mäkelä et al. (2000b) <sup>1</sup> |
| Soil water content, soil temperature                                  | Daily measurements of soil temperature and soil water content in different layers         | 6 Level II site <sup>2</sup> in Brandenburg (Germany)                                                  | Scots pine                            | Good correspondence of <b>simulated daily soil</b> water content and soil temperature with measured data for four years;                                                                                                                                              | Suckow et al. (2001)               |
| Management (DBH)                                                      | Long-term permanent plot measurements                                                     | Long-term management trials Chorin, Eberswalde                                                         | Scots pine, oak                       | Simulation of thinning preserved the diameter distribution of the residual stand and influenced the stand dynamics in the expected manner;                                                                                                                            | Lasch et al. (2005)                |
| Growth (stem volume, DBH, H, N), climate sensitivity, management      | Long-term permanent plot measurements                                                     | Fabrikschleichach (Bavaria, Germany), Chorin (Brandenburg, Germany), Eberswalde (Brandenburg, Germany) | Beech, oak, Scots pine                | Strong sensitivity of growth to the level of precipitation; sensitivity to drought larger for beech than for oak; simulated diameter development was slightly overestimated by the model, and height growth was slightly underestimated in most management scenarios; | Lindner et al. (2005) <sup>1</sup> |
| Soil respiration, litter, DBH growth, water balance, soil temperature | Soil water content, soil respiration, growth parameter, tree ring data                    | Level II sites <sup>2</sup> in Germany                                                                 | Beech, oak, Scots pine, Norway spruce | Realistic simulation of water balance and soil temperature; leaf mass and leaf litter simulations were valid;                                                                                                                                                         | Badeck et al. (2007) <sup>1</sup>  |

| <b>Process<br/>(variables)</b>                 | <b>Validation<br/>data</b>                                                    | <b>Site</b>                                                           | <b>Species</b>    | <b>Results</b>                                                                                                                                                                                                                                                                                                 | <b>Publication</b>               |
|------------------------------------------------|-------------------------------------------------------------------------------|-----------------------------------------------------------------------|-------------------|----------------------------------------------------------------------------------------------------------------------------------------------------------------------------------------------------------------------------------------------------------------------------------------------------------------|----------------------------------|
| Growth and soil processes                      | Stem biomass, foliage litter fall; soil water content and soil temperature    | Level II sites in Germany: Kienhorst, Solling                         | Scots pine, beech | Good correspondence for stem biomass; slight overestimation of foliage litter fall; good correspondence of simulated and observed soil temperature and soil water content in two depths (Kienhorst); deviation of simulated soil water content from observed data at the end of the dry year 2003 and in 2004. | Lasch et al. (2007)              |
| Carbon balance (stem C productivity, soil C)   | Stand level inventory data, stem wood productivity derived from yields tables | Forest management unit in the province of Carinthia, southern Austria | Norway spruce     | Realistically captured interactions between stand structure and forest floor C as represented in a local empirical model; simulated Norway spruce stem C productivity compared well to the observed values;                                                                                                    | Seidl et al. (2008) <sup>1</sup> |
| Management: thinning and conversion strategies | Experience from literature                                                    | Forest reserve Galgenberg (The Netherlands)                           | Scots pine        | Effects of different thinning types (from above and from below) and thinning intensities on stand structural characteristics such as tree density, spatial point pattern and diameter and height differentiation, were consistent with reported effects in various Scots pine conversion stands;               | Kint et al. (2009)               |
| Short rotation coppice                         | Woody biomass experimental data (yields) of SRC from literature               | Eastern Germany                                                       | Aspen             | Good correspondence of simulated yields with experimental data;                                                                                                                                                                                                                                                | Lasch et al. (2010)              |
| Forest growth (stem biomass, DBH, H)           | Long-term plot measurements                                                   | 4 Beech stands in forest district Buchfahrt, Thuringia (Germany)      | Beech             | 40 years of growth of the beech stands simulated very well; very good correlations between measured and simulated                                                                                                                                                                                              | Borys et al. (2013)              |

| Process<br>(variables)                                              | Validation<br>data                                                                 | Site                                                                                                                               | Species                          | Results                                                                                                                                                                                                                                                                                                                                        | Publication                          |
|---------------------------------------------------------------------|------------------------------------------------------------------------------------|------------------------------------------------------------------------------------------------------------------------------------|----------------------------------|------------------------------------------------------------------------------------------------------------------------------------------------------------------------------------------------------------------------------------------------------------------------------------------------------------------------------------------------|--------------------------------------|
|                                                                     |                                                                                    |                                                                                                                                    |                                  | stem biomasses for a 50-year simulation;                                                                                                                                                                                                                                                                                                       |                                      |
|                                                                     | Height, DBH                                                                        | 12 stands in Austria, Belgium, Estonia and Finland                                                                                 | Scots pine                       | Good predictive accuracy (a likelihood value from Bayesian calibration approach) for mean tree height and DBH (before calibration);                                                                                                                                                                                                            | van Oijen et al. (2013) <sup>1</sup> |
| Water and carbon fluxes, soil                                       | Daily flux measurements (GPP, NPP, TER, AET), soil temperature, soil water content | Flux-sites: Brasschaat (Belgium), Collelongo (Italy), Hesse (France), Hyytiälä (Finland), 5 Level-II sites <sup>2</sup> in Germany | Beech, Scots pine, Norway spruce | Carbon fluxes: low normalized errors and the Nash-Sutcliffe, model efficiency and the correlation coefficients are high; Hyytiälä: soil temperature follows the annual course of the measured values, no systematic bias exists; the soil water content in the organic layer is mostly not correctly simulated;                                | Reyer et al. (2014)                  |
| Transpiration, soil water, radial stem increment, root water uptake | Xylem sap flux, soil water content, tree ring measurements                         | Two pure pine stands and two mixed pine-oak stands in Brandenburg (Germany)                                                        | Scots pine, oak                  | For water uptake with low root resistance overestimation of tree transpiration and good accordance of simulated and observed soil water content; for water uptake with high root resistance high correlation between observed and simulated tree ring growth, better match of observed transpiration but overestimation of soil water content; | Gutsch et al. (2015b)                |
| Carbon and water fluxes                                             | Flux measurements (GPP, NPP, TER, AET)                                             | Euroflux-site Zotino, Siberia (Russia)                                                                                             | Scots pine                       | Best results of the comparison for GPP; ecosystem respiration and actual evapotranspiration seems not so well captured; satisfactory agreement between simulated and                                                                                                                                                                           | Suckow et al. (2016)                 |

| Process<br>(variables)         | Validation<br>data      | Site                                                                  | Species                               | Results                                                                                                                                                                                                                                                                                                                                                                           | Publication                         |
|--------------------------------|-------------------------|-----------------------------------------------------------------------|---------------------------------------|-----------------------------------------------------------------------------------------------------------------------------------------------------------------------------------------------------------------------------------------------------------------------------------------------------------------------------------------------------------------------------------|-------------------------------------|
|                                |                         |                                                                       |                                       | measured data for annual values of GPP, TER, NEE, and AET (May-September);                                                                                                                                                                                                                                                                                                        |                                     |
| Carbon stock in stand and soil |                         | Buchfahrt forest district in Thuringia (Germany), 4 beech stands      | Beech                                 | Successfully simulated past growth of four study sites independent of their thinning regime with 4C and WPM; validation on the level of the forest district: overestimation of the absolute C-stock in the biomass in comparison to the estimates based on inventory (using biomass functions); development of forest stands and harvests at forest district level were depicted; | Borys et al. (2016)                 |
| NPP                            | NPP from references     | Representative forest stands in Germany                               | Scots pine, Norway spruce, oak, beech | Static reduced models of NPP were derived from 4C simulations; comparison with results from literature showed that these functions provide meaningful estimates of NPP;                                                                                                                                                                                                           | Gutsch et al. (2016)                |
| Carbon fluxes                  | Flux measurements (NEE) | Flux-sites Sorø (Denmark), Vielsalm (Belgium) and Collelongo (Italy). | Beech                                 | Overestimation of NEE in periods of very high carbon uptake and mostly underestimation in periods of carbon release; asynchrony between simulations and observations was large in spring and autumn, dropping to lower levels in full summer and full winter; often overestimation of the importance of high frequency variability (inter-monthly to inter-daily) in NEE;         | Horemans et al. (2017) <sup>1</sup> |
| Basal area increment and       | Tree ring measurements  | Stand in the forest district Berlin-                                  | Scots pine,                           | Simulated basal area increment (BAI)                                                                                                                                                                                                                                                                                                                                              | Kollas et al. (2018)                |

| Process<br>(variables)               | Validation<br>data                                           | Site                   | Species                                                                           | Results                                                                                                                                                                                                                                                                                                                                                                         | Publication             |
|--------------------------------------|--------------------------------------------------------------|------------------------|-----------------------------------------------------------------------------------|---------------------------------------------------------------------------------------------------------------------------------------------------------------------------------------------------------------------------------------------------------------------------------------------------------------------------------------------------------------------------------|-------------------------|
| effect of<br>Mistletoe<br>infection  |                                                              | Müggelsee<br>(Germany) | infected<br>with<br>Mistletoe                                                     | corresponded well with<br>BAI calculated from<br>measured tree ring<br>width; ring width indices<br>of both non-infected<br>trees and trees infected<br>from 1994 on were<br>found to run<br>synchronously in relative<br>but also in absolute<br>values; good<br>reproduction of the<br>absolute level of growth,<br>of the general growth<br>trends and the pointer<br>years; |                         |
| Timber<br>harvest, stem<br>increment | BWI <sup>3</sup> (forest<br>inventory data<br>Germany No. 3) | Germany                | Scots<br>pine,<br>Norway<br>spruce,<br>oak,<br>beech,<br>birch,<br>Douglas<br>fir | Reproduction of species-<br>specific yields (stem<br>increment and timber<br>harvest) in good<br>correspondence with<br>inventory data; strong<br>underestimation of<br>Douglas fir stem<br>increment, moderate<br>overestimation of oak<br>stem increment;                                                                                                                     | Gutsch et<br>al. (2018) |

<sup>1</sup> – model comparisons; <sup>2</sup> – ICP Forests intensive monitoring plots

### 2.3 Test sites, data and simulation setup

To evaluate the current version of 4C regarding long-term growth, as well as water and carbon fluxes we selected four sites representing the main central European tree species from the PROFOUND database that allows to test forest models against a wide range of observational data (developed by the COST Action FP1304 PROFOUND; (Reyer et al. (in preparation), Reyer et al. (2019)) and additional sources (Table 3, Table 4, Supplement Table S3). In the scope of PROFOUND several other forest models are using these data and comparisons between the models regarding the results are ongoing. For Peitz (Scots pine), Solling (Norway spruce) and Hyytiälä (mixed stand of Scots pine and Norway spruce) we evaluated forest growth by stem biomass (BM) and diameter at breast height (DBH) or geometric mean diameter (DG) measurements. These data were not available for Sorø from real measurements. The availability of diameter variables differs from site to site in the PROFOUND database (see also Supplement Table S2). Furthermore, for Hyytiälä and Sorø (Common beech) flux data were available, which were not the case for Solling and Peitz. We did not calibrate species-specific parameters for the considered sites.

**Table 3 Site characteristics, data source: PROFOUND database**

| Site                  | Species                                                 | Type                            | Lon<br>[°] | Lat<br>[°] | Alt.<br>[m] | Meteorological<br>conditions            | Mean<br>temperature<br>[°C] | Mean<br>annual<br>precipitation<br>sum<br>[mm] | Simulation<br>time<br>period | Soil<br>type           |
|-----------------------|---------------------------------------------------------|---------------------------------|------------|------------|-------------|-----------------------------------------|-----------------------------|------------------------------------------------|------------------------------|------------------------|
| Peitz<br>(Germany)    | <i>Pinus<br/>sylvestris</i> /<br>Scots<br>pine          | Long-term<br>monitoring<br>site | 14.<br>35  | 51.<br>92  | 50          | continental                             | 9.3                         | 554                                            | 1952-<br>2010                | Dystrophic<br>Cambisol |
| Solling<br>(Germany)  | <i>Picea<br/>abies</i> /<br>Norway<br>spruce            | Level II                        | 9.5<br>7   | 51.<br>77  | 50<br>4     | maritime                                | 6.8                         | 1108                                           | 1967-<br>2013                | Cambisol<br>(haplic)   |
| Sorø<br>(Denmark)     | <i>Fagus<br/>sylvatica</i> /<br>Common<br>beech         | Euroflurix                      | 11.<br>64  | 55.<br>49  | 40          | warm<br>temperate<br>and fully<br>humid | 8.3                         | 848                                            | 1996-<br>2012                | Cambisol               |
| Hyytiälä<br>(Finland) | <i>Pinus<br/>sylvestris</i> /<br><i>Picea<br/>abies</i> | Euroflurix                      | 24.<br>29  | 61.<br>85  | 18<br>5     | continental                             | 4.4                         | 604                                            | 1996-<br>2014                | Haplic<br>Podsol       |



328 **Table 4** Stand characteristics at the beginning of the simulations/ measurements

| Site              | Species                 | Age | Mean<br>H [m] | Mean<br>DBH [cm] | Number of<br>trees per ha |
|-------------------|-------------------------|-----|---------------|------------------|---------------------------|
| Peitz             | <i>Pinus sylvestris</i> | 53  | 7.4           | 9.1              | 3860                      |
| Solling           | <i>Picea abies</i>      | 85  | 23.9          | 30.2             | 595                       |
| Sorø <sup>1</sup> | <i>Fagus sylvatica</i>  | 77  | 25.0          | 38.0             | 426                       |
| Hyytiälä          | <i>Pinus sylvestris</i> | 34  | 10.9          | 12.7             | 870                       |
|                   | <i>Picea abies</i>      | 34  | 4.1           | 3.7              | 967                       |

329 H – height, DBH – diameter at breast height, <sup>1</sup> – source: derived from Horemans et al. (2017)

### 330 2.3.1 Climate, soil, stand, and observational data

331 Climate, stand, soil data, and observational data for model evaluation were available from the PROFOUND database (Reyer  
332 et al., 2019) In addition to the gap-filled half-hourly flux data from the PROFOUND database we used the monthly and  
333 annual aggregated data from FLUXNET (<http://fluxnet.fluxdata.org/data/fluxnet2015-dataset/>). We checked the half-hourly  
334 flux data and removed implausible data on a daily basis. Some additional data are used for the initialization of the soil profile  
335 for Hyytiälä which are based on Haataja and Vesala (1997).

### 336 2.3.2 Management

337 All sites were simulated considering a management which realizes the stem removal according to the inventory records.  
338 Therefore, the time of occurrence and the intensity of thinnings have been prescribed for the respective runs. The type of  
339 thinning (e.g. thinning from above) was also selected on the basis of available management information in the database  
340 (Table 5).

341 **Table 5** Management description for all sites

| Site     | Number of<br>management<br>measures | Type                         | Target value |
|----------|-------------------------------------|------------------------------|--------------|
| Peitz    | 11                                  | Moderate thinning from below | Stem number  |
| Solling  | 13                                  | Thinning from above          | Stem number  |
| Sorø     | 1                                   | Thinning from above          | Stem number  |
| Hyytiälä | 3                                   | Thinning from above          | Stem number  |

### 342 2.4 Evaluation metrics

343 For the evaluation of growth at the sites Peitz, Solling and Hyytiälä we selected the variables arithmetic mean diameter at  
344 breast height (DBH) or the geometric mean diameter (DG) and stem biomass (BM), which were analysed with an annual  
345 time step. The choice of different diameter-based variables (DBH, DG) results from the availability in the used  
346 PROFOUND-database. We applied regression analysis between observed and simulated values to determine the regression  
347 coefficient R<sup>2</sup> and its significance (with SigmaPlot for Windows Version 11.0), and the model efficiency (ME) (Loague and  
348 Green, 1991):

$$ME = 1 - \frac{\sum_{i=1}^N (O_i - P_i)^2}{\sum_{i=1}^N (O_i - \bar{O})^2}$$

where  $O_i$  are observation values,  $P_i$  are simulation values,  $\bar{O}$  is the mean of observation values, and  $N$  is the number of values. ME estimates the proportion of variance of the data explained by the 1:1 line and is an overall indication of goodness of fit (Mayer and Butler, 1993); a positive value indicates that the simulated values describe the trend in the measured data better than the mean of the observations (Medlyn et al., 2005a; Smith et al., 1997). Furthermore, we calculated the normalized root mean square error (Keenan et al., 2012):

$$NRMSE = \frac{\sqrt{\frac{1}{N} \sum_{i=1}^N (O_i - P_i)^2}}{\sigma_{obs}}$$

where  $\sigma_{obs}$  represents the standard deviation of the observation values.

Where available, we evaluated carbon (net ecosystem exchange (NEE), gross primary production (GPP)) and water fluxes (actual evapotranspiration (AET)), soil temperature (ST) and soil water content (SWC) in different layers using the same statistical measures on daily and monthly (and annual) time scales.

We also analysed the inter-monthly and inter-annual variability of the carbon and water fluxes. At this end we applied the method described by Keenan et al. (2012) and Vetter et al. (2008) to the monthly and annual time series of observed and simulated GPP, NEE and AET. The inter-monthly variability (IMV) is calculated as follows:

$$IMV_{m,t}^V = V_{m,t} - \bar{V}_m$$

$\bar{V}_{m,t}$  – monthly variable (GPP; NEE, AET) (sum) of month  $m$  and year  $t$

$\bar{V}_m$  - long-term monthly mean of the variable  $V$  for month  $m$  ( $m=1, 12$ )

The inter-annual variability (IAV) is calculated for the annual time series of the considered variables  $V$ :

$$IAV_t^V = V_t - \bar{V}$$

$V_t$  –annual  $V$  of year  $t$

$\bar{V}$  - long-term mean of  $V$

The resulting monthly and annual ‘normalized’ times series (observed and simulated) were compared and subjected to statistical and graphical analyses.

### 3 Results

#### 3.1 Forest growth

Judging from the statistical measures, 4C shows the best performance in terms of ME of DG and BM for Peitz. For Solling the model performance is slightly lower than for Peitz but ME is still well above 0.7 (Table 6). For Hyytiälä, the model performance (ME) for DBH of pine is better than for spruce, however the performance measures for the stem biomass are low. The negative values indicate that the residual variance (observed minus simulated) is greater than the variance of the observed values. For Hyytiälä, 4C overestimated the DBH for both pine and spruce. In case of the stem biomass 4C overestimated observed values for pine but underestimated it for spruce (Fig. 5, Supplement Fig. S3).

The measure of deviation between observed and simulated data (NRMSE) and the ME show for Peitz and Hyytiälä better results for DBH/DG than for stem biomass. The stem biomass simulations are less precise for all sites because biomass simulation depends on simulated height increment and NPP allocation to sapwood and the sapwood senescence rate. The large negative ME values for DBH and BM of spruce at the site Hyytiälä indicate a poor result of the model. 4C underestimated the BM and overestimated DBH of spruce in this forest (Fig. 5, Supplement Fig. S3). The values of  $R^2$  are very high for all variables and sites but do not give a good measure of model performance (Medlyn et al., 2005b).

383  
384  
385  
386  
387  
388

**Table 6** Statistics for the three sites (DG – geometric mean diameter, DBH – diameter at breast height, BM – stem biomass, number – number of values)

|                | Peitz   |         | Solling |         | Hyytiälä Pine |         | Hyytiälä Spruce |         |
|----------------|---------|---------|---------|---------|---------------|---------|-----------------|---------|
|                | DG      | BM      | DBH     | BM      | DBH           | BM      | DBH             | BM      |
| number         | 13      | 13      | 19      | 18      | 16            | 16      | 16              | 16      |
| NRMSE          | 0.119   | 0.382   | 0.465   | 0.338   | 0.644         | 1.049   | 2.574           | 3.146   |
| ME             | 0.985   | 0.842   | 0.772   | 0.879   | 0.557         | -6.064  | -6.064          | -9.560  |
| R <sup>2</sup> | 0.988** | 0.964** | 0.984** | 0.933** | 0.983**       | 0.939** | 0.972**         | 0.985** |

\*\* - p<0.001

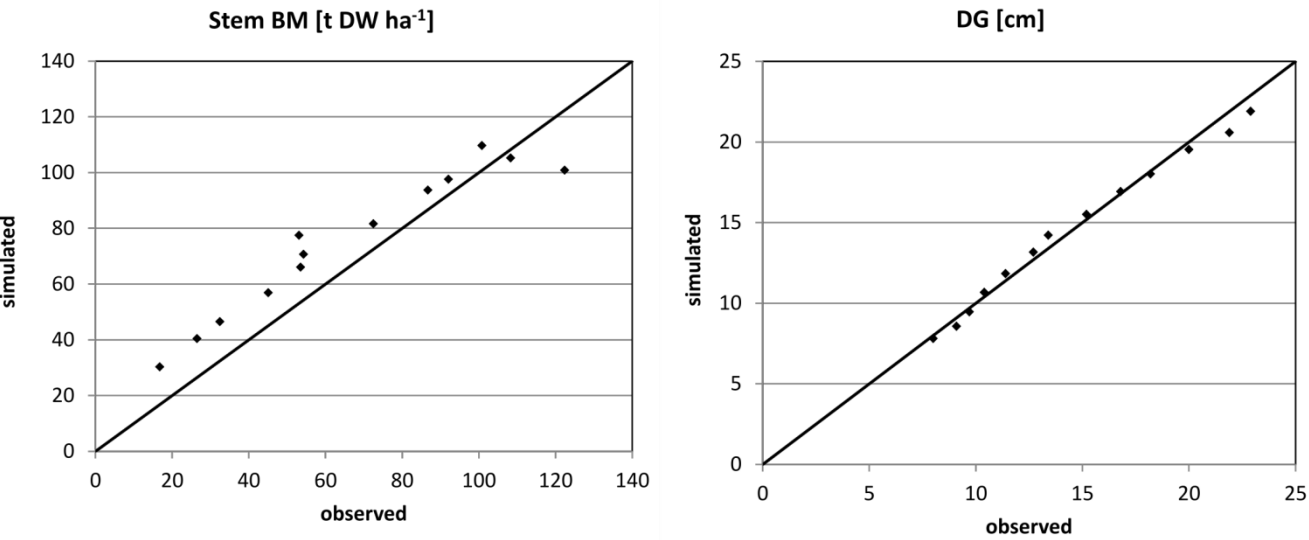

**Figure 3.** Simulated (sim) versus observed (obs) DG and stem biomass BM for Peitz. The plots show scatter plots with a 1:1 line.

391  
392

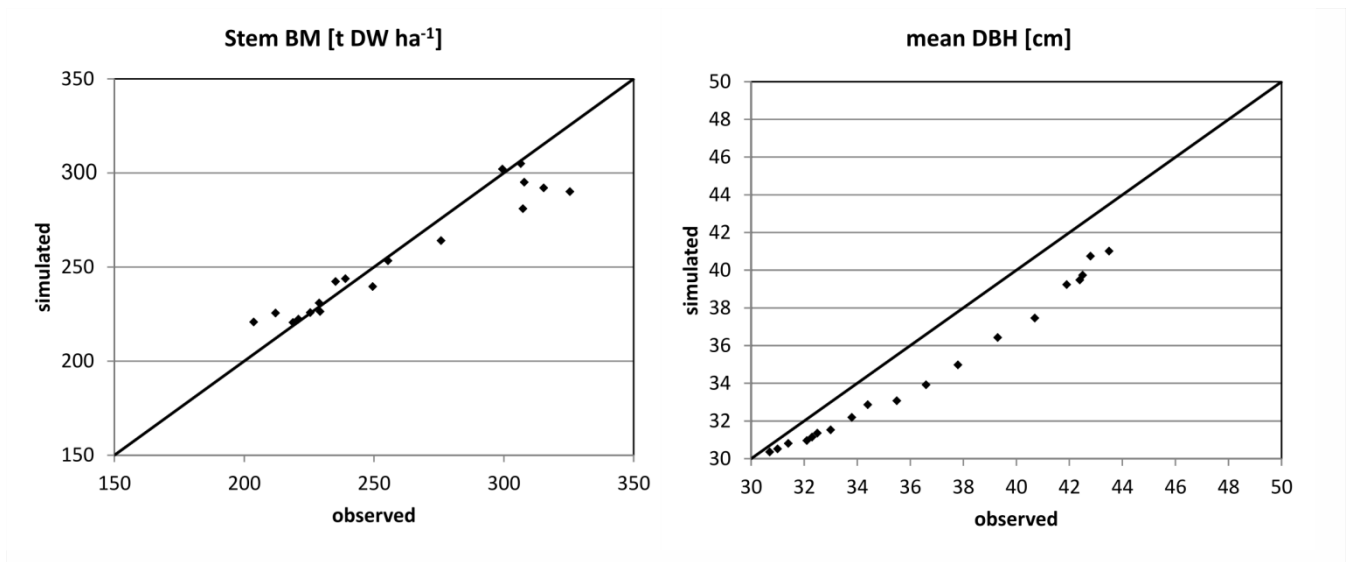

**Figure 4. Simulated (sim) versus observed (obs) DBH and stem biomass BM for Solling. The plots show scatter plots with a 1:1 line..**

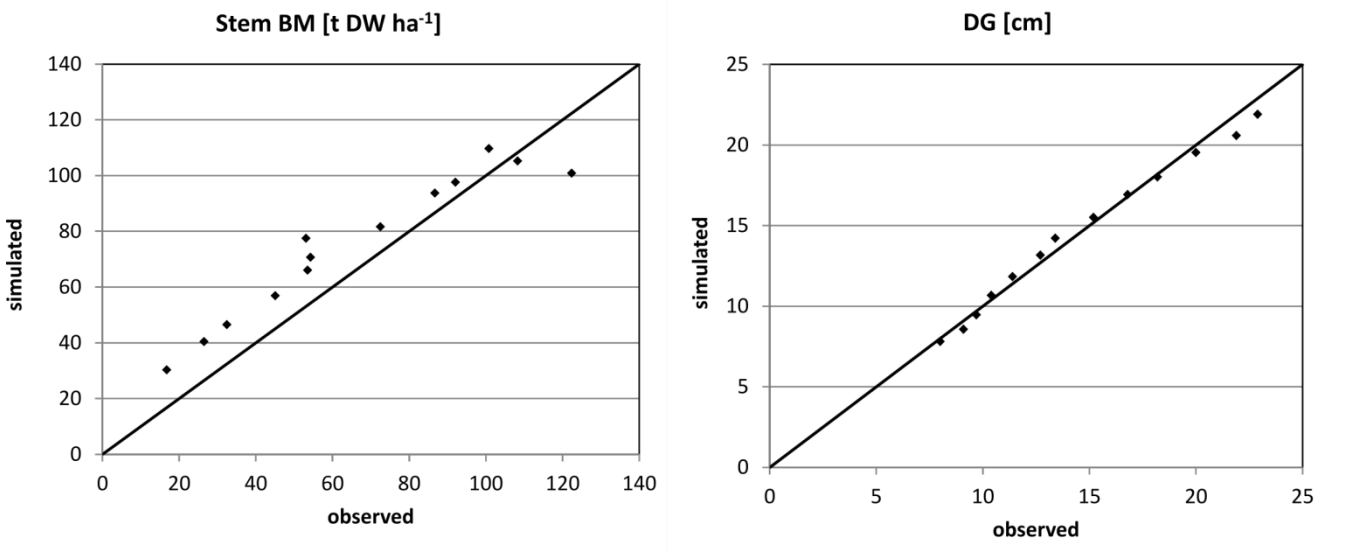

**Figure 5. Simulated (sim) versus observed (obs) DBH and stem biomass BM for Hyytiälä (Pisy – pine, Piab – spruce). The plots show scatter plots with a 1:1 line..**

## 3.2 Carbon and water fluxes

### 3.2.1 Evaluation over long-time scales at different time resolutions

The averages of the simulated annual fluxes in comparison with the observed averages show a good correspondence for GPP for Sorø and Hyytiälä. In Sorø, 4C overestimates the long-term average of GPP by 3.7 % and in Hyytiälä by 3.5 % (Table 7). The NEE is clearly underestimated in Sorø and Hyytiälä on long-term average. The same is true for the AET in Sorø but it is slightly overestimated for Hyytiälä. The statistical measures  $R^2$  and ME show very low correspondence between observed and simulated annual values (Table 7).

409 **Table 7 Annual long-term means (+/- standard deviation) and evaluation metrics of water and carbon fluxes in Sorø (1997-2012)**  
 410 **and Hyytiälä (1996-2014)**

| Sorø                                               | Annual statistics |                  |                   |       |         |                       |
|----------------------------------------------------|-------------------|------------------|-------------------|-------|---------|-----------------------|
|                                                    | Number of years   | Observed average | Simulated average | NRMSE | ME      | R <sup>2</sup>        |
| Annual AET [mm]                                    | 16                | 431.3±41.2       | 313.8±22.6        | 2.977 | -8.453  | 0.223 <sup>nsN</sup>  |
| Annual NEE [g C m <sup>-2</sup> yr <sup>-1</sup> ] | 16                | -148.3±130.2     | -385.8±100.3      | 2.403 | -5.160  | 0.437 <sup>**N</sup>  |
| Annual GPP [g C m <sup>-2</sup> yr <sup>-1</sup> ] | 16                | 1892.5±132.4     | 1972.7±112.5.1    | 1.336 | -0.902  | 0.001 <sup>nsN</sup>  |
| <b>Hyytiälä</b>                                    |                   |                  |                   |       |         |                       |
| Annual AET [mm]                                    | 11                | 320.6±38.1       | 381.6±41.0        | 2.039 | -3.5748 | 0.0328 <sup>nsN</sup> |
| Annual NEE [g C m <sup>-2</sup> yr <sup>-1</sup> ] | 17                | -213.65±53.8     | -348.03±45.4      | 2.764 | -7.1188 | 0.0172 <sup>nsN</sup> |
| Annual GPP [g C m <sup>-2</sup> yr <sup>-1</sup> ] | 17                | 1160.80±102.4    | 1209.2±157.8      | 1.304 | -0.8066 | 0.3435 <sup>ns</sup>  |

411       \*\* - p<0.001  
 412       \* - p<0.05  
 413       <sup>ns</sup> - not significant  
 414       <sup>N</sup> – normal distribution  
 415

416 For the daily and monthly sums of fluxes, the evaluation metrics indicate a much higher agreement, with the monthly results  
 417 showing a better agreement with the observations than the daily results (Table 8). The evaluation metrics for Hyytiälä are  
 418 slightly better than for Sorø especially for AET and GPP: For Sorø, 4C simulates days without any GPP, while GPP values  
 419 greater than zero were observed. Daily AET is underestimated for days with a high observed AET (greater than 4 mm). For  
 420 Hyytiälä, 4C clearly overestimates GPP and AET but also NEE for single days by more than 50% (Fig. 6, right). The intra-  
 421 annual variability on a monthly scale in Sorø for the three variables (Figure 6, left) shows that 4C underestimates GPP from  
 422 January to April but during the vegetation period the GPP is clearly overestimated (and NEE underestimated). AET is  
 423 underestimated throughout the year. In Hyytiälä, 4C overestimates the monthly GPP and underestimates the NEE during the  
 424 vegetation period from May until July (Supplement Fig. S11). The variability of the monthly GPP from May until August is  
 425 higher for the simulated values than for the observed values in Sorø (Supplement Fig. S7); for Hyytiälä, it is the other way  
 426 around. The monthly AET is overestimated throughout the year.

436

437

438 **Table 8 Evaluation metrics for daily and monthly sums of AET, NEE and GPP for Sorø (1996-2012) and Hyytiälä (1996-2014)**

|          | Daily             |       |       |                | Monthly            |       |       |                |
|----------|-------------------|-------|-------|----------------|--------------------|-------|-------|----------------|
| Sorø     | Number<br>of days | NRMSE | ME    | R <sup>2</sup> | Number<br>of month | NRMSE | ME    | R <sup>2</sup> |
| AET      | 6058              | 0.591 | 0.651 | 0.734**        | 199                | 0.508 | 0.745 | 0.884**        |
| NEE      | 6058              | 0.691 | 0.522 | 0.601**        | 199                | 0.513 | 0.735 | 0.805**        |
| GPP      | 6058              | 0.718 | 0.544 | 0.743**        | 199                | 0.489 | 0.760 | 0.877**        |
| Hyytiälä |                   |       |       |                |                    |       |       |                |
| AET      | 3945              | 0.593 | 0.649 | 0.764**        | 136                | 0.408 | 0.833 | 0.906**        |
| NEE      | 6170              | 0.643 | 0.587 | 0.634**        | 220                | 0.514 | 0.734 | 0.855**        |
| GPP      | 5398              | 0.507 | 0.743 | 0.814**        | 188                | 0.452 | 0.794 | 0.877**        |

439 \*\* - p<0.001

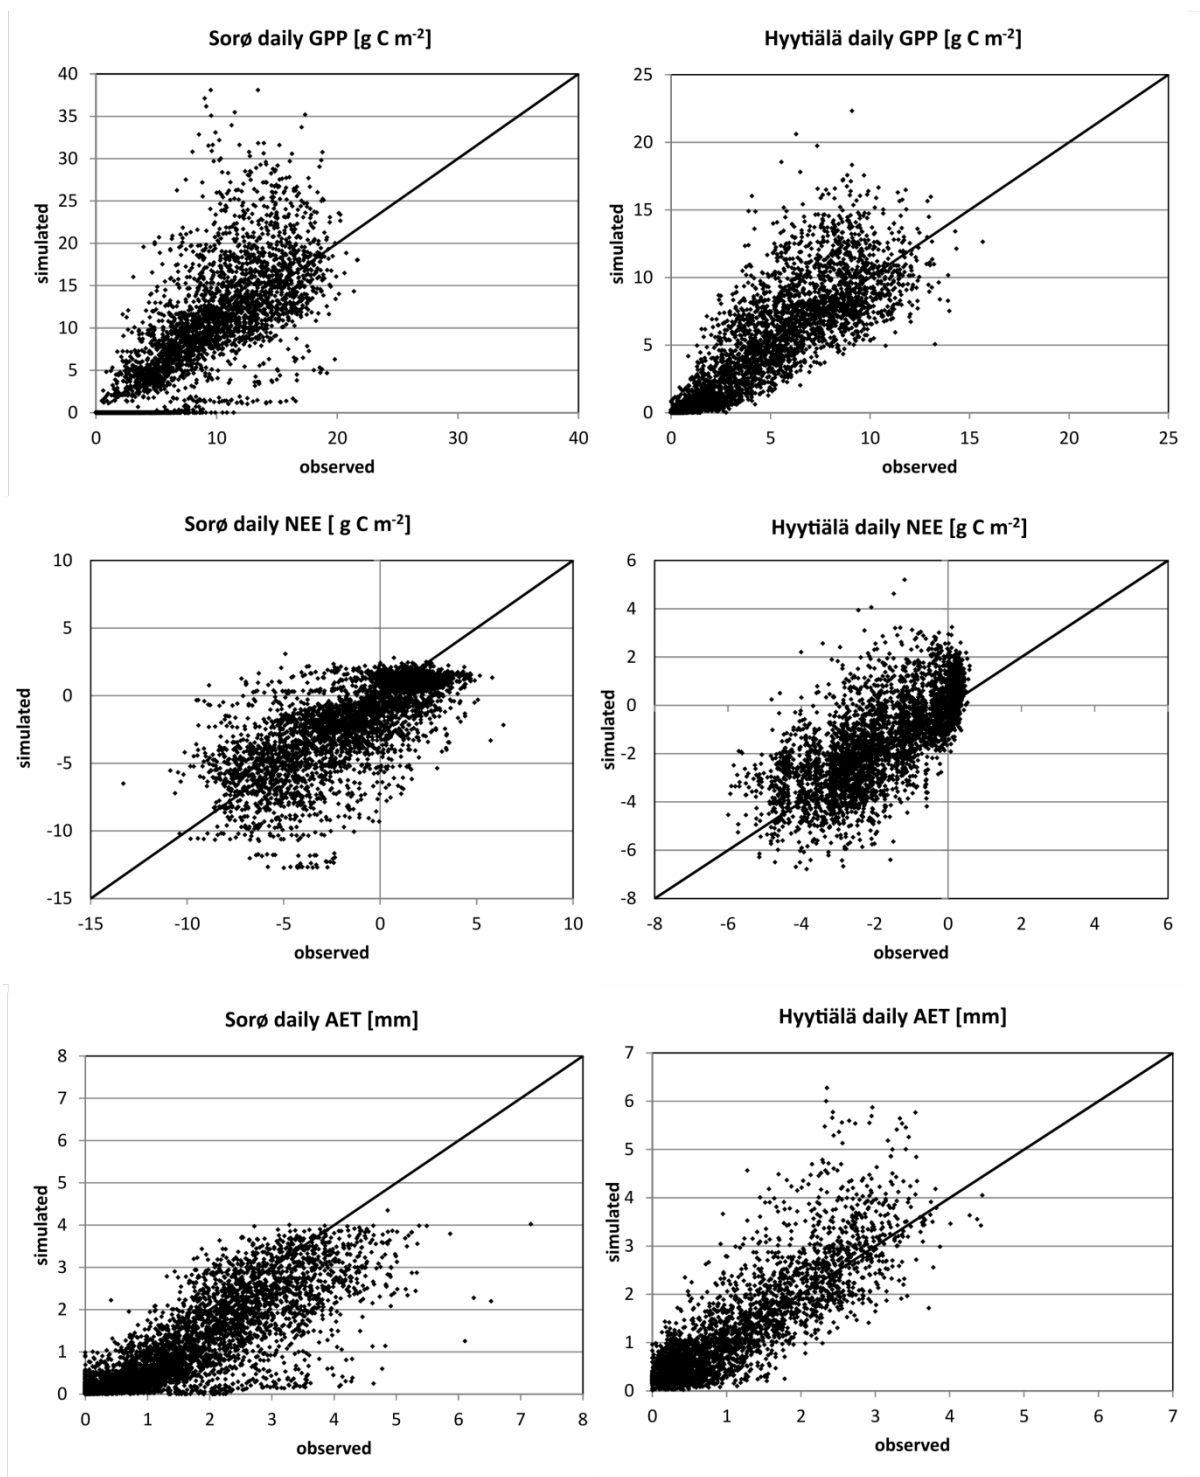

440

441 **Figure 6. Simulated versus observed daily GPP, NEE and AET in Sorø (left) and Hyytiälä (right). The black line shows a 1:1**  
 442 **relationship.**

### 443 3.2.2 Inter-monthly (IMV) and inter-annual variability (IAV)

444 The simulated and observed inter-annual variability is nearly in the same order of magnitude for both sites and for the three  
 445 variables except for a few years for Sorø (1997: GPP, NEE) and Hyytiälä (1997-1998, GPP, 2006 AET) (Figure 7). The  
 446 signs of IAV were best captured for Hyytiälä with 82 % for GPP, 65 % for NEE and 70 % of the years for AET. In Sorø, the  
 447 signs of IAV of GPP and NEE is not captured by the model, in most of the years the signs are opposite to observed IAV  
 448 except for AET (63 %).



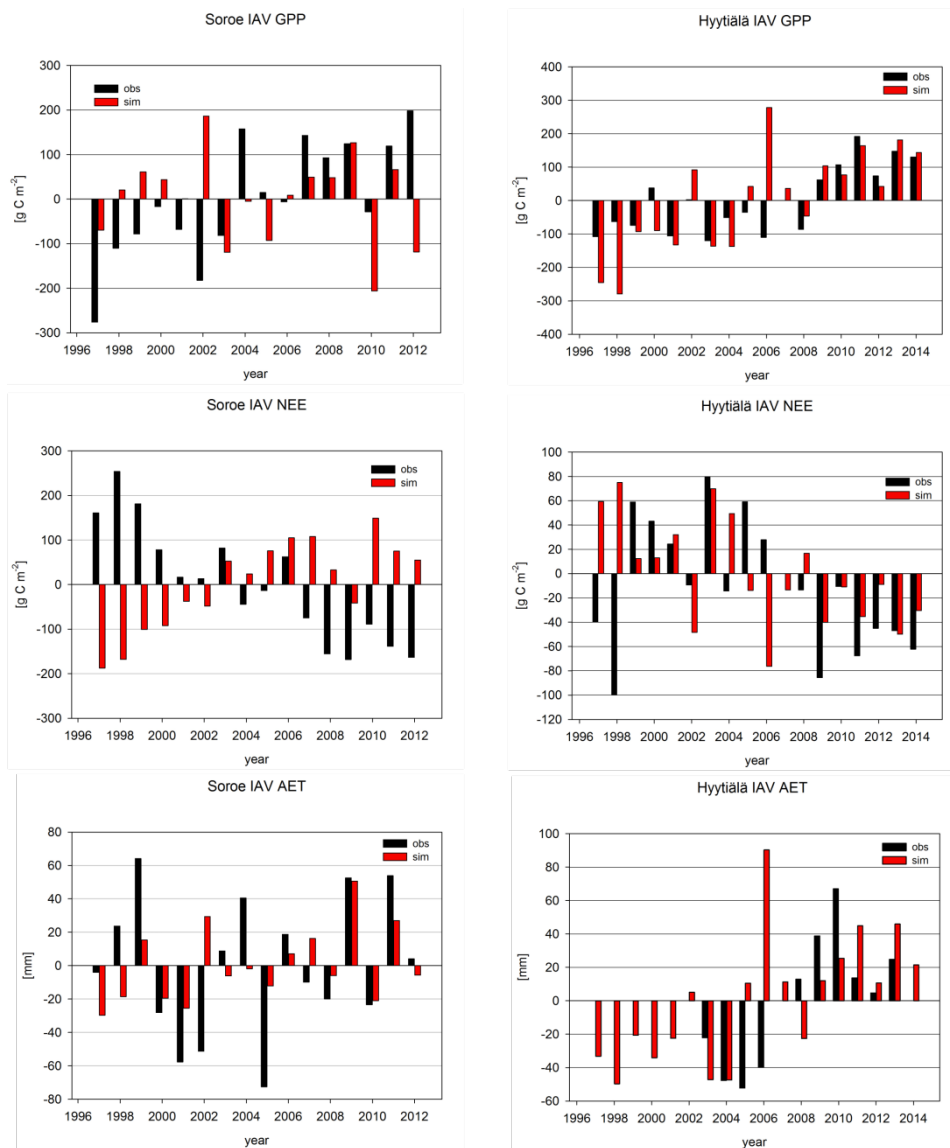

449

450 **Figure 7. Inter-annual variability of GPP, NEE and AET (sim - simulated and obs - observed) in Sorø (left) and Hyytiälä (right).**

451 The analysis of inter-monthly variability with the normalized IMV data shows similar inter-quartile ranges for simulated and  
 452 observed IMV but a clearly higher range of the IMV of simulated GPP and NEE for Sorø (Figure 8, left). The IMV of AET  
 453 differs in the interquartile ranges for simulated and observed data but the range is similar. The simulated variables for  
 454 Hyytiälä show a lower variability especially for the NEE, and somewhat lower also for the AET. The simulated GPP has a  
 455 smaller range of the inter-monthly variability than the observed GPP (Figure 8, right).

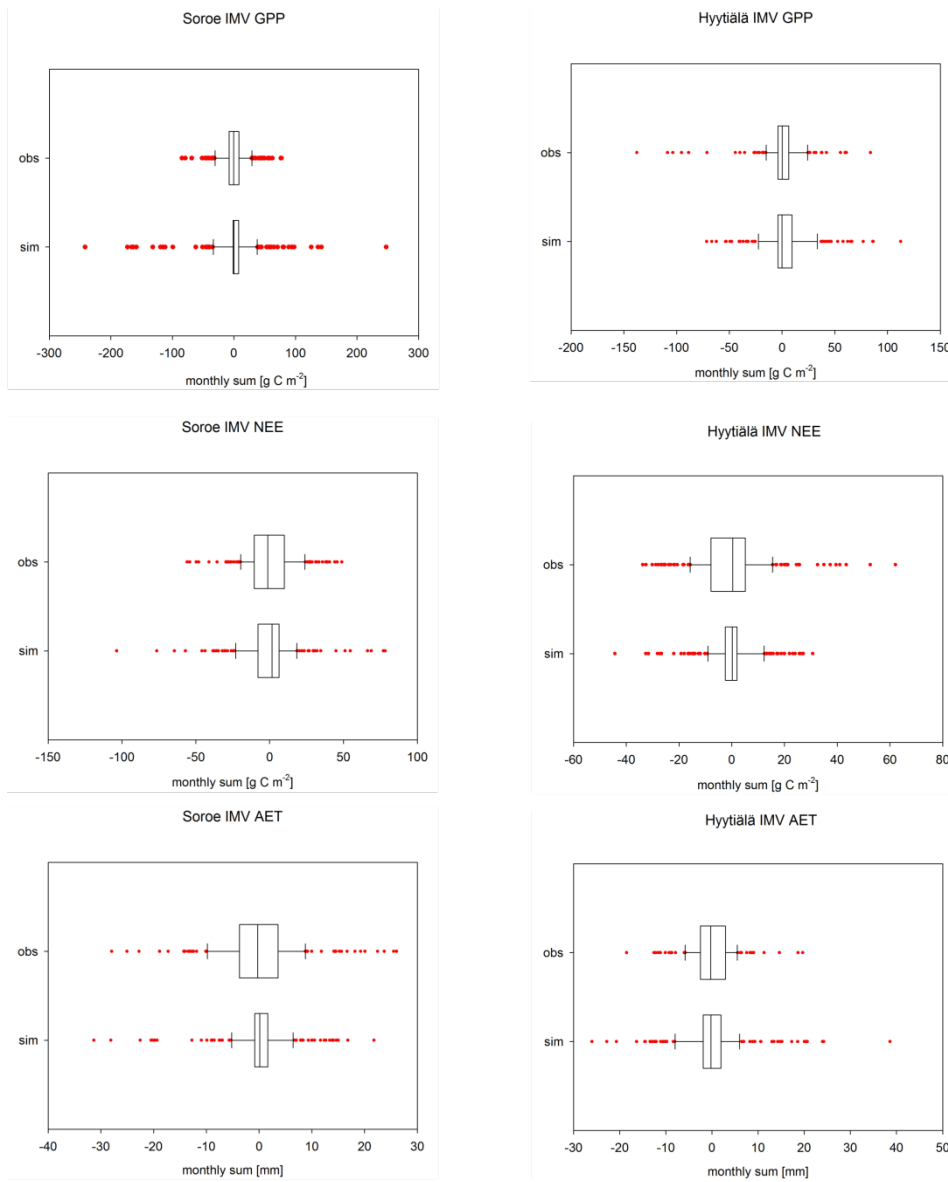

**Figure 8. Distribution of the magnitude for the inter-monthly variability values (IMV) of observed (obs) and simulated (sim) monthly sums of GPP, NEE and AET in Sorø (left) and Hyytiälä (right). The graphs show the median, the 25<sup>th</sup> and 75<sup>th</sup> percentile (box), the 10<sup>th</sup> and 90<sup>th</sup> percentile (whiskers) and the outliers.**

### 3.3 Soil temperature and water content

The simulated soil temperature (ST) fits very well with the observed data in Sorø (Figure 9, top and middle) and Hyytiälä (Figure 10). With increasing soil depth, the bias between simulated and observed values decreases, which is reflected in a decreasing NRMSE and an increasing ME and  $R^2$  (Table 9). This applies for the daily and monthly statistics with the statistics on monthly level being slightly better than on daily level in most cases. In Hyytiälä, the simulated soil temperature in winter is lower than the observed temperature for the years 1996 until 2005 and consequently also the simulated depth of frost (Figure 10).

In contrast, the simulation of the soil water content (SWC) is less accurate for both sites. Comparing simulated and observed soil water content for all soil layers leads to very low  $R^2$  values and also to low model efficiencies ME (Table 9). In Sorø, the model underestimates the water content in the upper mineral layer especially in winter time (Figure 9, below). During summer, the model simulates an exhaustion of the soil water content up to the wilting point for several days and more often than observed. Altogether, the model responds to precipitation faster than it is indicated by the measurements.

474 **Table 9** Daily and monthly statistics of soil temperature (ST) and soil moisture (SWC), Sorø 1996-2012 and Hyytiälä (1996-2014)

| Sorø              | Daily             |       |        |                     | Monthly             |       |        |                     |
|-------------------|-------------------|-------|--------|---------------------|---------------------|-------|--------|---------------------|
|                   | Number<br>of days | NRMSE | ME     | R <sup>2</sup>      | Number<br>of months | NRMSE | ME     | R <sup>2</sup>      |
| ST 2 cm           | 6073              | 0.370 | 0.863  | 0.942 <sup>**</sup> | 199                 | 0.169 | 0.887  | 0.959 <sup>**</sup> |
| ST 10 cm          | 6073              | 0.283 | 0.920  | 0.951 <sup>**</sup> | 199                 | 0.130 | 0.943  | 0.972 <sup>**</sup> |
| SWC 8 cm          | 5645              | 1.175 | -0.382 | 0.286 <sup>**</sup> | 183                 | 0.261 | -0.414 | 0.288 <sup>**</sup> |
| Hyytiälä          |                   |       |        |                     |                     |       |        |                     |
| ST organic layer  | 6828              | 0.338 | 0.886  | 0.914 <sup>**</sup> | 225                 | 0.259 | 0.974  | 0.948 <sup>**</sup> |
| ST 5 cm           | 6828              | 0.346 | 0.880  | 0.913 <sup>**</sup> | 225                 | 0.253 | 0.916  | 0.941 <sup>**</sup> |
| ST 18 cm          | 6560              | 0.250 | 0.937  | 0.943 <sup>**</sup> | 216                 | 0.178 | 0.954  | 0.959 <sup>**</sup> |
| ST 50 cm          | 6560              | 0.263 | 0.931  | 0.943 <sup>**</sup> | 216                 | 0.167 | 0.947  | 0.958 <sup>**</sup> |
| SWC organic layer | 6438              | 0.978 | 0.043  | 0.167 <sup>**</sup> | 216                 | 0.311 | 0.062  | 0.118 <sup>**</sup> |
| SWC 5 cm          | 6438              | 1.196 | -0.431 | 0.176 <sup>**</sup> | 216                 | 0.328 | -0.299 | 0.128 <sup>**</sup> |
| SWC 18 cm         | 6309              | 0.861 | 0.259  | 0.337 <sup>**</sup> | 211                 | 0.261 | 0.217  | 0.269 <sup>**</sup> |
| SWC 50 cm         | 6438              | 0.983 | 0.034  | 0.129 <sup>**</sup> | 213                 | 0.303 | -0.192 | 0.261 <sup>**</sup> |

475 <sup>\*\*</sup> - P<0.001

476 <sup>ns</sup> - not significant

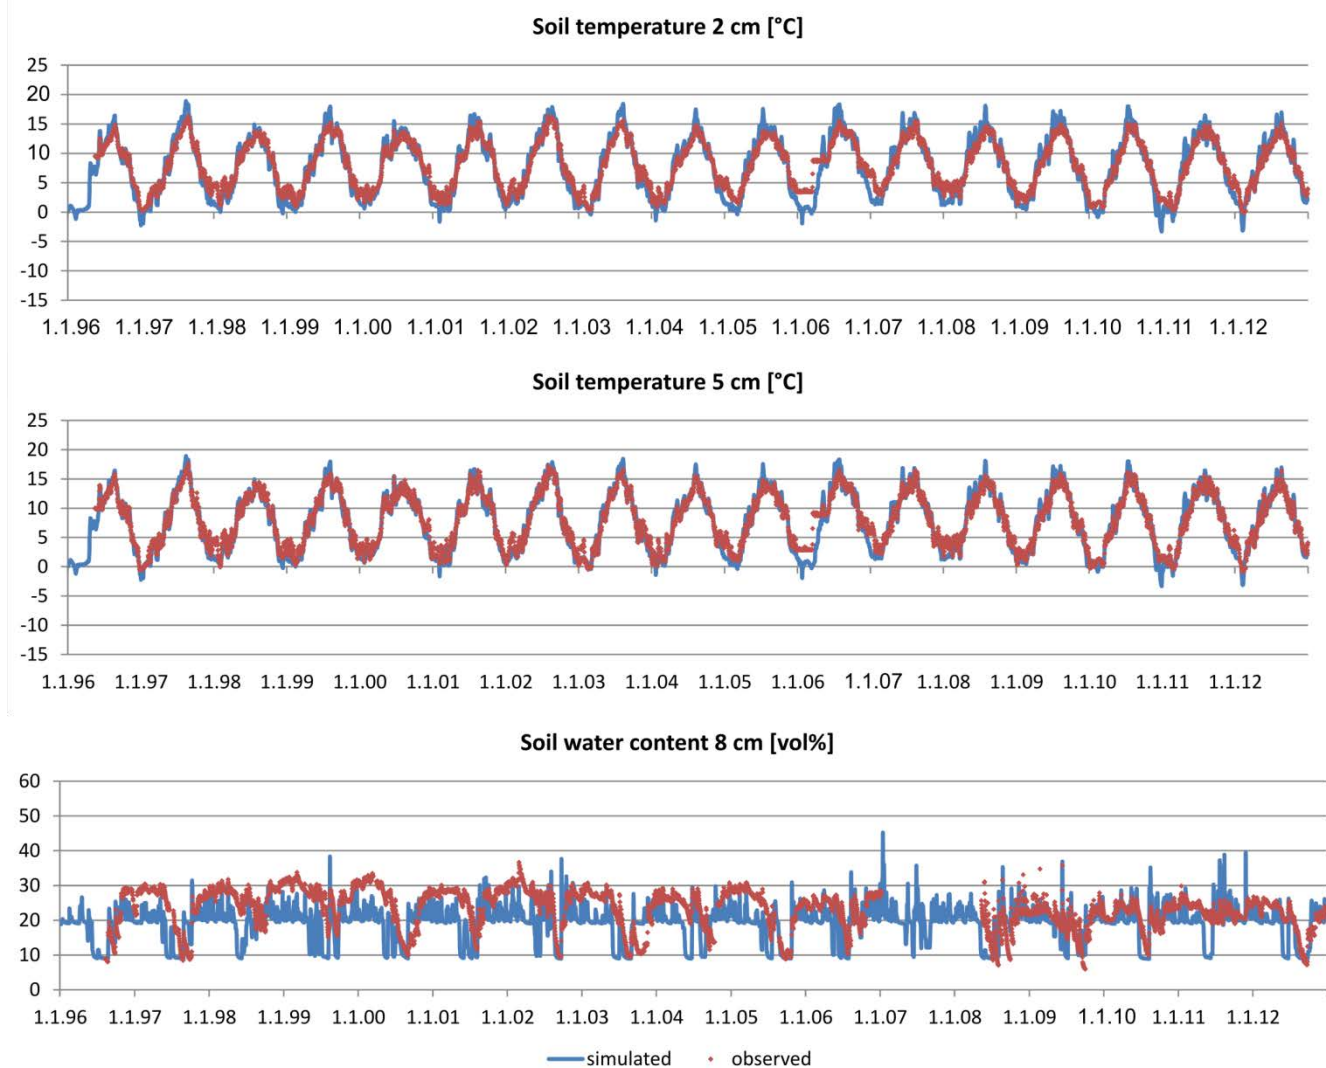

477

478 **Figure 9. Time series of observed and simulated daily soil temperature at 2 cm and 10 cm depth (at the top and middle) and time**  
 479 **series of observed and simulated daily soil water content at 8 cm depth (below) in Sorø for the period 1996-2012.**

480 For Hyytiälä, the results are similar (Figure 11). The visual inspection for two layers shows a similar picture to Sorø: an  
 481 underestimation during winter time and a more frequent exhaustion of the soil water during summer. The observed water  
 482 uptake frequently reaches a depth of 50 cm, while the simulated water uptake only reaches a maximum depth of 50 cm in the  
 483 very dry months of July and August 2006, with only one third and half of the precipitation sum of the long-term mean,  
 484 respectively. The interquartile ranges and the ranges of outliers of soil water content are mostly higher for the simulated  
 485 values than for the measured (Figure 12, right).

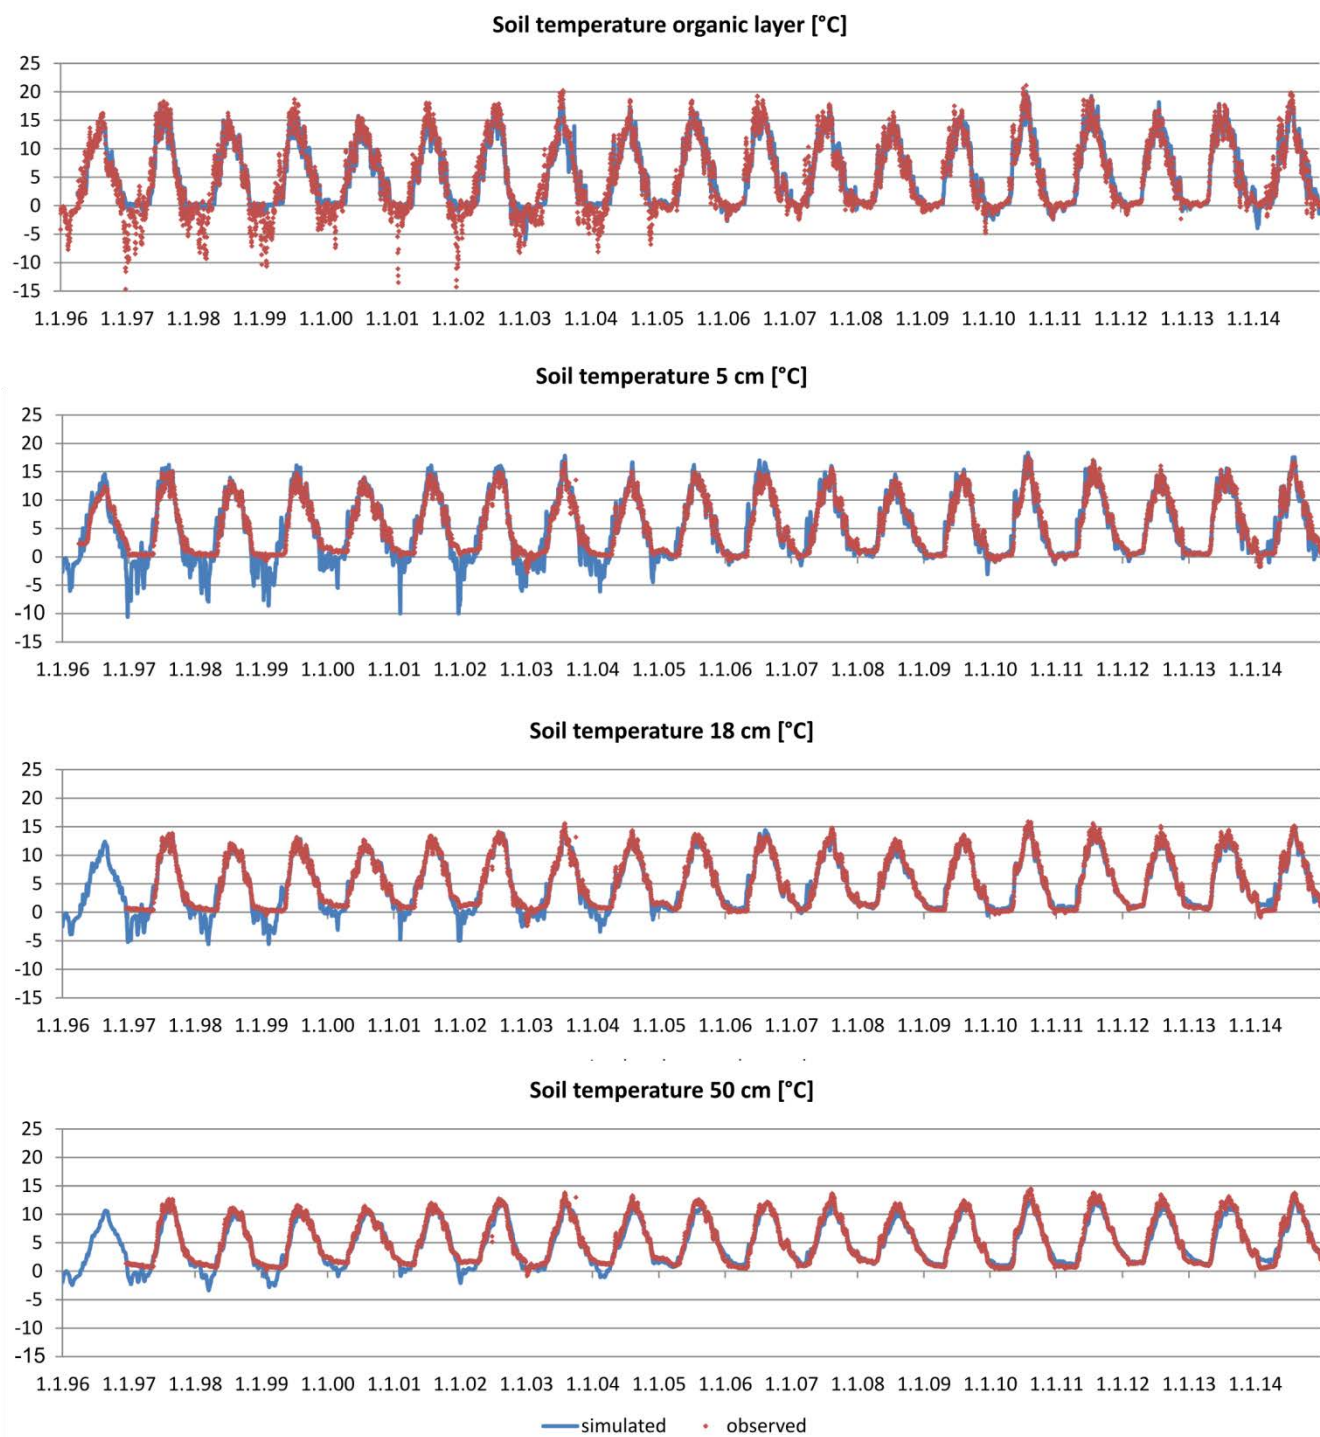

486

487 **Figure 10.** Time series of observed and simulated daily soil temperature for the organic layer and at 5, 18, and 50 cm depth in  
 488 Hyytiälä for the period 1996-2014.

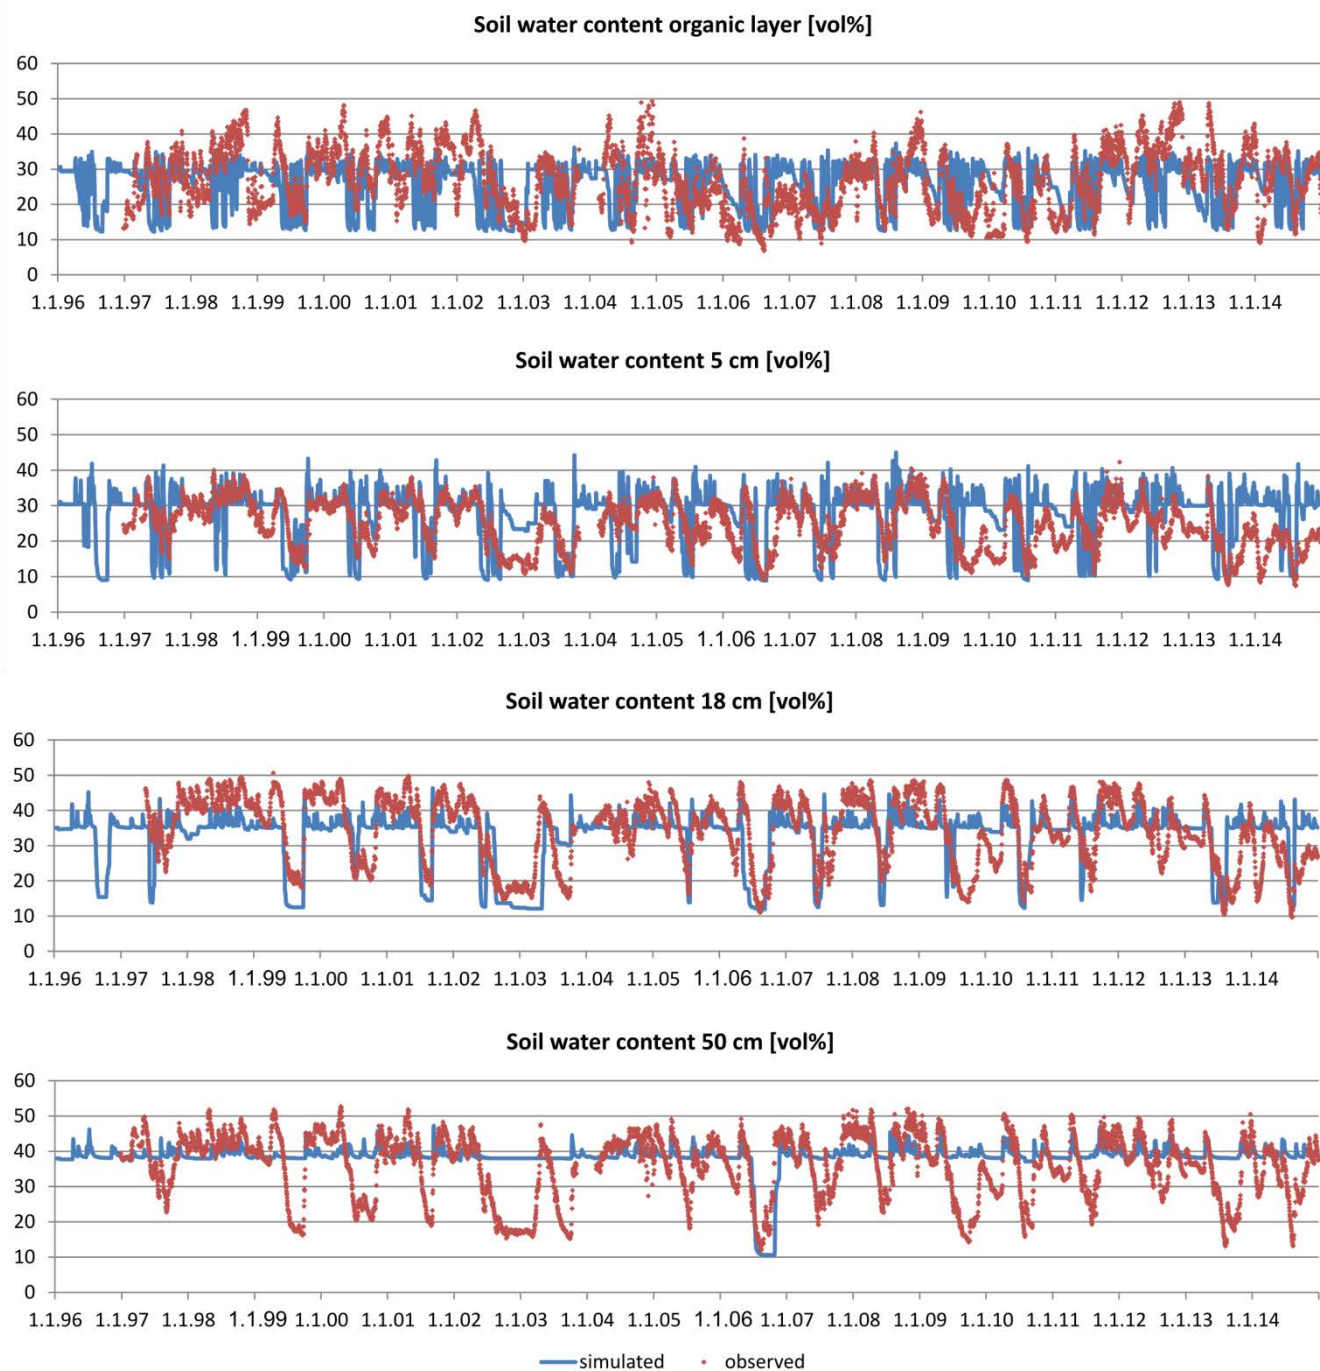

**Figure 11 Time series of observed and simulated daily soil water content at organic layer and at 5, 18, and 50 cm depth in Hyytiälä for the period 1996-2014.**



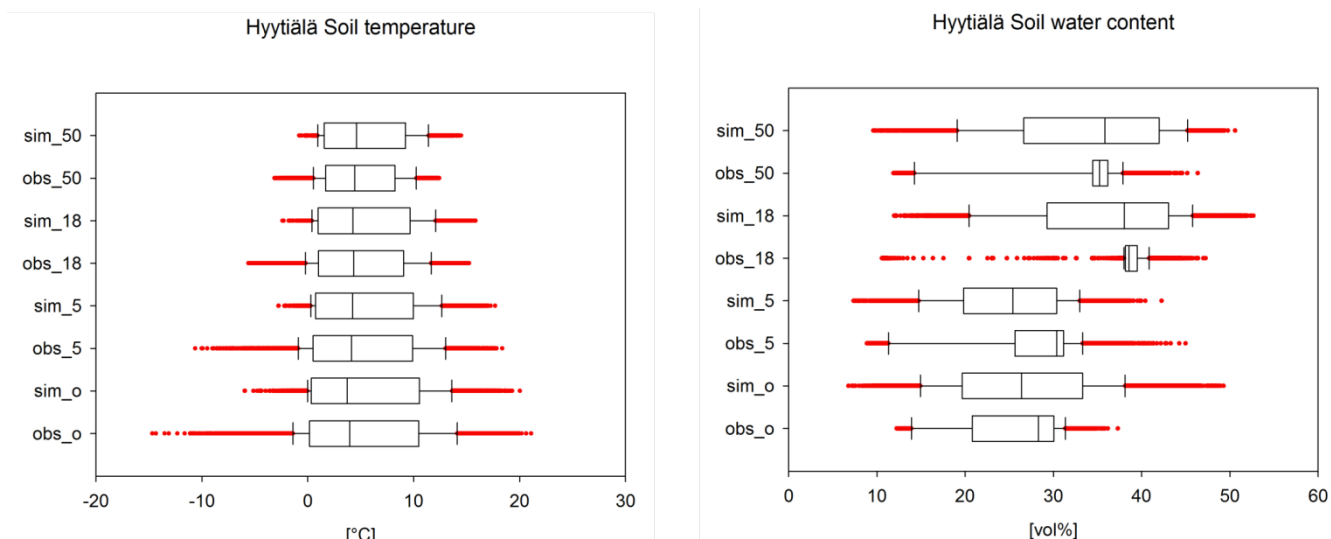

**Figure 12. Distribution of magnitude of daily soil temperature and soil water content (observed and simulated) in different soil layers (organic layer, layer in 5, 18, and 50 depth) in Hyytiälä. The graph shows the median, the 25<sup>th</sup> and 75<sup>th</sup> percentiles (box), the 10<sup>th</sup> and 90<sup>th</sup> percentiles (whiskers) and the outliers.**

## 4 Discussion

We analyse the capability of 4C to reproduce growth, carbon and water fluxes with different temporal resolution as well as soil water content and soil temperature in different soil layers for four forest stands in different bioclimatic zones of Europe. This is also done with regard to previous validations to demonstrate the importance of specific processes that may vary according to boundary conditions and site characteristics. As so often with the evaluation of complex forest models, not all sites and scales can be evaluated due to different data availability. Nevertheless, the analysis of the results for each of the sites and variables selected here provides important information on the applicability of 4C.

### 4.1 Evaluation of forest growth

Overall, the ability of 4C to reproduce the dynamics of forest growth differs clearly from site to site. 4C performs best for the mono-specific, coniferous stands Solling and Peitz independent of the evaluation metrics. In particular for Peitz, which features the longest observational time series of Scots pine growth, we observe the best agreement between model and data (Fig. 3, Supplement Fig. S1). For Solling 4C underestimates the development of DBH (Fig. 4, Supplement Fig. S2). Ibrom (2001) and Ellenberg et al. (1991) found similar carbon storage in this spruce stand in 1967 of 9314 g C m<sup>-2</sup> as initialized by 4C based on tree dimensions (10840 g C m<sup>-2</sup>), indicating that basic assumptions about stem form and wood density are appropriate. Our initialization prescribes the same number of trees (595 ha<sup>-1</sup>) as observed but strongly underestimates foliage (needle) mass (4C: 422.5 g C m<sup>-2</sup> vs. 868 g C m<sup>-2</sup> found by Ellenberg et al. (1991)). We applied the fixed parameter  $\eta_s$  (foliage to sapwood area relationship) to estimate foliage mass, which could lead to this underestimation. Furthermore, the estimation of sapwood area from DBH used for initialization is also uncertain. Consequently, our initialization leads to a smaller leaf area index (LAI) of 5.1 m<sup>2</sup> m<sup>-2</sup> in 1990 compared to a value of 7 m<sup>2</sup> m<sup>-2</sup> reported by Ibrom (2001) for the same year. In 4C, the initialization of the foliage biomass as well as fine root biomass is estimated via a function depending on sapwood area and a parameter describing the foliage to sapwood area relationship. Therefore, it is possible that 4C's underestimation of DBH growth is due to the underestimation of foliage biomass during initialization. While foliage is underestimated, the initialization works well for DBH. Ibrom (2001) gives the values for mean DBH (35 cm) and mean top height (28 m) which are nearly matched by 4C with a DBH of 35 cm and mean top height of 31.8 m. The initialization of height of tree cohorts uses height-diameter relationships from various yield tables which can lead to deviations in comparison with measured data.



523 The quality of growth simulation in Hyytiälä differs for the two species. For Norway spruce, which is present in the  
 524 understorey of this pine-dominated stand, stem biomass initialization is underestimated but growth is realistic, whereas the  
 525 stem biomass growth of pine is slightly overestimated (Fig. 5, Supplement Fig. S3). Due to thinning according to given stem  
 526 numbers the stem biomass is again overestimated after thinning because other trees were harvested in the model stand as in  
 527 the real stand. Model runs based on management with given stem numbers from measured data are not able to use the  
 528 information which stem was harvested in the real stand. Comparing simulated biomass data of stem biomass for the mixed  
 529 stand Hyytiälä with measurements (personal communication by Fredrik Lagergren) for the initialization year 1995 we find  
 530 that pine stem biomass is in accordance with measurement while spruce stem biomass is clearly underestimated (see Fig. 5,  
 531 Supplement Fig. S3).

532 Earlier model evaluations of stand dynamics for different species such as pine, spruce and beech in Germany by Lasch et al.  
 533 (2005); Lasch et al. (2007); Lindner et al. (2005) demonstrated a sufficient ability of the model to reproduce forest growth in  
 534 terms of DBH, height and biomass. Thus, while in general we have confidence in the ability of 4C to simulate forest growth,  
 535 it is important to keep in mind that 4C works with a site-independent species parameter set and we did not calibrate any of  
 536 the parameters locally. Results in terms of matching absolute observed values could therefore clearly differ on Scots pine  
 537 stands in Germany and Finland, depending on parameter uncertainty for different genera (Collalti et al., 2016). For example,  
 538 trees in Finland often develop crown shapes that are more adapted to reducing snow damage – this is an example for an  
 539 adaptive trait that is evolutionary and is not considered in the model.

## 540 4.2 Evaluation of carbon and water fluxes

541 We analysed the model's performance to simulate carbon and water fluxes using statistical measures on different time scales.  
 542 For Sorø and Hyytiälä, 4C performed best when comparing simulation results with observational data on daily and monthly  
 543 scales for GPP, NEE and AET (Table 8). Collalti et al. (2016) also found a better performance for their 3D-CMCC-FEM  
 544 model on a monthly scale for these sites.

545 For both sites, 4C overestimated GPP and underestimated NEE on long-term average. This could be caused by the simplified  
 546 simulation of ecosystem respiration in 4C (see section 2.1.2.3). Because organ-specific, dynamic respiration rates are hard to  
 547 parameterize due to a lack of data, the respiration rate in 4C is a fixed fraction of GPP following an approach of Landsberg  
 548 and Waring (1997). However, caution is needed as errors of flux measurements could also be a reason for deviations  
 549 between observed and simulated values on all time scales (e.g. Brændholt et al. (2018); Rannik et al. (2006)). The standard  
 550 deviations of the annual GPP are of similar magnitude for observations and simulation data, which indicates high variability  
 551 from year to year in both data sets. For Sorø, the standard deviations of NEE are also very high for simulated and observed  
 552 annual values whereas for Hyytiälä the standard deviations are of a lower order of magnitude. In former model validation  
 553 experiments with 4C for the site Hyytiälä (Reyer et al., 2014) we concluded that systematic underestimation of NEE at low  
 554 temperatures causes this deviation between measured and observed fluxes, which is still a problem.

555 The annual course of GPP and NEE in Sorø shows a sharp increase of GPP with the start of the vegetation period (bud burst)  
 556 which is faster than the simulated flushing. For one reason, the phenological model of 4C (Schaber and Badeck, 2003;  
 557 Schaber, 2002) for beech was derived from long-term observational data in Germany and hence the model parameters might  
 558 not represent the phenology of beech in Denmark. In fact, the 4C average generated day of bud break for 1999-2009 is DOY  
 559 120, while (Pilegaard et al., 2011) found values between 118 and 134 with a mean being DOY 129. Furthermore, we did not  
 560 consider ground vegetation because ground vegetation implemented in 4C is not suitable for beech stands (see section 2.1.3).  
 561 Therefore, the simulated GPP during winter time is zero and the NEE is underestimated during this time period (Supplement  
 562 Fig. S7). The mismatches in phenology were also discussed by Collalti et al. (2016). For Sorø, Horemans et al. (2017)  
 563 discussed in great detail the differences between simulated and observed NEE for 4C and concluded that 4C overestimates

the importance of high frequency variability because 4C uses the daily temperature to redistribute the weekly calculated NEE and the applied dependency is possibly too sensitive.

4C simulates the AET quite well except on the annual scale. For Hyytiälä the statistics show a better correspondence of observed and simulated AET at daily and monthly time scale than for Sorø, where the long-term annual amount as well as the daily AET values are underestimated (Fig. 6, Table 8). The annual course of AET for Sorø shows a large underestimation of AET during the vegetation period in contrast to a slight overestimation at Hyytiälä (Supplement, Fig. S11). At Hyytiälä Grote et al. (2011) come to a similar result for the simulation period 1996-2007 with a slightly lower  $R^2$ . Similarly, the monthly AET in Sorø in the months prior to bud break (January to May) is underestimated, presumably because ground vegetation is not taken into account. In the model we assume that there is no transpiration when there are no leaves. But in Sorø ground vegetation consisting of *Anemone nemorosa* L. and *Mercurialis perennis* L. exists before bud break (Pilegaard et al., 2001) and in that time the AET is underestimated clearly by the model. High values of observed AET of more than 4 mm per day show almost no correlation to radiation and only weak correlation to air temperature, but the approach of Penman-Monteith used in 4C calculates the potential evapotranspiration in dependence on radiation and air temperature. Obviously, there are other factors that influence the AET. Furthermore, the soil data for field capacity, wilting point, pore volume and percolation were only estimated by pedotransfer functions. This estimation might explain the underestimation of water supply causing the deviations in AET simulations from observations. In contrast, for Hyytiälä these data were available from measurements leading to a better simulation of AET.

Model validation with eddy covariance data is known to have some inherent problems (Medlyn et al., 2005b; Robinson et al., 2005). Therefore, we performed informal interpretation of residual diagrams (Supplement Fig. S4, S8) showing positive correlations between the simulated values and the residual deviation for all variables (GPP, NEE, AET). This indicates that high simulated values of GPP and AET are overestimated at both sites. Considering the statistical measures, for instance, the good accuracy of simulated AET at the daily and monthly scale shows that the model is able to describe the day to day and seasonal variability. On one hand, the good accuracy on these scales does not imply good accuracy on an annual scale due to the nonlinear relationships between the statistical measures. On the other hand, at the annual scale more modelled processes influence the AET, GPP and NEE, in particular the length of the growing season, the ground vegetation and the tree growth (e.g. leaf area). The seasonality on an intra-annual scale is described sufficiently by the model but on the inter-annual scale the seasonality is lost due to the aggregation.

We also analysed the inter-annual variability (IAV) with so-called normalized time series indicating the variation from year to year between the observed and simulated annual values of GPP, NEE and AET. At both sites the magnitude of inter-annual variability is similar between observations and simulations for all variables except for some years (Figure 7). The signs of the IAV differed clearly more often for Sorø than for Hyytiälä. However, for both sites the signs of simulated as well as for observed GPP IAV are negative in the extremely dry year 2003 (Granier et al., 2007). For the AET this is only the case for Hyytiälä. This underlines a serious problem in simulating AET for the beech stand, due to missing consideration of ground vegetation even though the statistical measures on daily and monthly time scale are sufficiently good (Table 8).

4C reproduced IAV of GPP, NEE and AET clearly better for Hyytiälä than for Sorø. The lower performance in Sorø could be explained by the imprecise simulation of evapotranspiration and available water at Sorø which, in turn, influences the NEE via a water limitation factor. The fact that the AET in Sorø cannot be modelled well with 4C is also expressed by the inter-monthly variability, which is higher simulated than measured.

The IAV of the observations is caused by a high number of physical, biological and anthropogenic factors affecting the photosynthesis, respiration and water fluxes of forest ecosystems (Lagergren et al. (2008)). The reproduction of the IAV by the model requires information about these factors and model approaches describing these known but often not observed factors. This deficit could also contribute to the inconsistency of the simulated IAV with the observed timing of variability (Keenan et al., 2012).

Overall, our results are in accordance with the finding of Baldocchi et al. (2018) showing from analysis of flux data a clearly higher IAV of NEE in a temperate deciduous forest than in a boreal evergreen forest. They explained the variability in ecosystem photosynthesis as the more dominant factor causing IAV in net ecosystem carbon exchange which is confirmed by our results.

For Hyytiälä the interquartile ranges of observed IMV are smaller not only for AET but also for NEE in comparison to simulated IMV. The latter could be caused by the ecosystem respiration (soil and stand). The IMV of monthly simulated NEE is clearly lower than the IMV of the observed NEE (Figure 8) during the vegetation period. In Sorø it is the other way around (see Figure 8). GPP shows the same pattern. We suspect that this behaviour could be caused by differences in the length of vegetation period between coniferous and deciduous species as well as different climatic conditions. Discussions about the ability of models to reproduce flux variability are hampered by the problem that flux data are subject to random error roughly in proportion to the size of flux, especially during summer (Keenan et al., 2012). Another major source of data uncertainty is related to the technique of eddy covariance measurements (Medlyn et al., 2005b). The higher observed fluxes at the deciduous forest site in this period could lead to higher random errors in the observations.

### 4.3 Evaluation of soil water content and soil temperature

Our results show that 4C is able to reproduce soil temperature in different depths at Sorø and Hyytiälä very well (Fig. 10 top and middle, Figure 10). The implemented soil temperature model (Suckow, 1986) is physically based and gives trustworthy results, as former model evaluations have confirmed (e.g. Reyer et al. (2014)). The statistics of soil temperature match results obtained in a modelling study with the CoupModel in Hyytiälä (Wu et al., 2011, 2012). In Hyytiälä, 4C did not simulate a snow pack until 2005 potentially because snow cover is underestimated due to unrealistic low winter precipitation (Supplement Fig. S12). Hence the simulated soil temperature of the upper layer is much lower than the observed values and thus the freezing depth is greater than observed. Starting from 2006, winter precipitation data seem more realistic and the model simulated a snow pack leading to a much better fit between the simulated and observed soil temperatures. The evaluation results for the site Hyytiälä were similar to the results shown by Reyer et al. (2014).

The evaluation of the soil water model is more difficult. Wu et al. (2011) stated that the performance of soil moisture was poorer than soil temperature performance in their modelling study at Hyytiälä with calibrated parameters. The minimum  $R^2$  ranges between 0.03 and 0.27 in the different soil layers and is in the same order of magnitude as in our simulations. The model is able to reproduce the intra-annual cycle of soil water content with low values during vegetation time and clearly higher values during winter time (Figure 9 below, Figure 11). The negative ME values for three different depths at both sites (Table 9) means that the mean square error exceeds the variance of the observed data and that the model is not consistent with the observed data. In detail, the model reproduced the lowest values during summer time in Sorø and Hyytiälä for the three upper layers caused by the water uptake of the trees, but underestimated the soil water content during winter at both sites. In Sorø the groundwater table rises in winter up to 20 cm and falls in the summer down to 2 m below the surface (Pilegaard et al., 2011). The model 4C does not consider fluctuating groundwater level and is parametrized with a constant ground water depth of 2 m at this site. Therefore the observed high water content in winter time due to the high ground water level cannot be reproduced by the simulation. In Hyytiälä the observed water uptake reaches up to a depth of 75 cm, but the simulation results show that the water uptake from the deeper layers is not needed to satisfy the simulated transpiration demand with the exception of the dry summer 2006 (Figure 11).

The uncertainty of simulated soil water content is mainly determined by the parameterization of the soil profile and its approach to calculate the potential evapotranspiration and the water demand. The soil parameters field capacity and wilting point are hard to determine exactly for all soil layers (Supplement Table S3). Furthermore, the parameter rooting depth and the distribution of fine roots in the layers are often not accurately known, but they control the water uptake (Medlyn et al., 2011). Another component of the water balance is the ground vegetation which is not considered in the model for these two

649 sites. Former evaluation of the soil water model at other sites (e.g. ICP-Forests level II monitoring plots) achieved better  
650 statistical results (Reyer et al., 2014) which may depend on the soil type, the soil parameterization and the quality of soil  
651 water content measurements. A former analysis comparing the applied water uptake approach in 4C with a more process-  
652 based approach indeed indicated that missing data on root length densities might be crucial (Gutsch et al., 2015b).

#### 653 4.4 Applicability and Reliability of 4C

654 Analysing the model results for four sites across Europe, Peitz (pine), Solling (spruce), Sorø (beech) and Hyytiälä (mixed  
655 pine spruce) underlines the challenge of validating tree growth as well as carbon and water fluxes on observational data with  
656 different temporal resolution at stand scale. The temporal development of important forest growth metrics (stem diameter  
657 and stem biomass) is represented in the correct order of magnitude with 4C. It reproduces the seasonality of the water and  
658 carbon fluxes in principles compared with observations although deviations and distinctions are clear on the daily scale. The  
659 model results are sensitive to weather influences and soil properties and all together support the use of 4C as a tool for  
660 investigating forest dynamics in managed forest stands. In comparison to former evaluations of the model (Reyer et al.,  
661 2014) we not only compared observed and simulated data but used further methods to analyse biases in annual and monthly  
662 variability. These methods allowed us also to evaluate the ability of 4C to reproduce extreme years like 2003 as shown for  
663 GPP simulated in Hyytiälä (see section 4.2).

664 We aimed for a model which simulates forest growth in terms of height, diameter and biomass as well as the water, nitrogen  
665 and carbon fluxes without any site-specific calibration. Even though uncertainties in model parametrization for all species  
666 and the uncertainties in model structure contribute to partly insufficient results (Medlyn et al., 2005b) we argue that it is  
667 encouraging to see how well 4C performs overall across these very different sites. In agreement with other recent studies  
668 with 4C (Borys et al., 2016; Gutsch et al., 2015a; Gutsch et al., 2016), this study underlines the applicability of 4C to its  
669 main research areas: (1) studies on climate impacts on managed forest ecosystems, (2) trade-off studies on forest-based  
670 ecosystem services, (3) studies on forest management strategies and risk analysis, (4) carbon accounting of forest-based  
671 bioenergy, and (5) studies on understanding the underlying functioning of forest ecosystems.

672 Yet our results clearly show that representation of some processes in 4C should be improved, e.g. the phenology sub-model  
673 and the description of ground vegetation as an important element in the water balance. Moreover, the way respiration is  
674 modelled was identified as a major uncertainty. A new model version including a non-structural carbohydrates (NSC) pool in  
675 a changed allocation scheme is currently under development. This version will allow calculation of the organ-specific  
676 respiration and will possibly improve the calculation of ecosystem respiration. Furthermore, by considering this pool in the  
677 carbon balance the model will be able to react to biotic disturbances and will be able, e.g., to describe the effects of  
678 defoliators on the forest ecosystem.

679 Parameter calibration is possible with 4C if it is supported by data, as carried out by Reyser et al. (2016) and van Oijen et al.  
680 (2013). Application of generic calibration could improve model results at various stands as shown by Minunno et al. (2016)  
681 by a site-specific calibration, and Peltoniemi et al. (2015) for the site Hyytiälä. Molina-Herrera et al. (2015) confirmed that  
682 site-specific and multi-site calibration leads to a model parameterization that is best suited for simulating daily carbon fluxes  
683 with a forest growth model (Pnet).

#### 684 5 Conclusions

685 The model 4C belongs to a family of process-based forest models in Europe summarized by (Fontes et al., 2010). In the  
686 scope of PROFOUND project 4C will be compared at the sites analysed here with some of these models, e.g. 3D-CMCC  
687 FEM (Collalti et al., 2014), Landscape-DNDC (Haas et al., 2013), and LPJ\_GUESS (Smith et al., 2014).

688 The validation of 4C on the basis of a variety of observation data shows the usefulness of this model in the analysis and  
689 interpretation of the development of typical European forest stands. Nevertheless, various opportunities for the improvement  
690 of model processes and parameterization can be identified. The drought-stress effect on tree growth has to be improved and  
691 validated with tree-ring width and isotope data to reflect the mismatch of observed and simulated water dynamics in deeper  
692 soil layers. The discussion on tree mortality as an important demographic process (Neumann et al., 2017; Anderegg et al.,  
693 2016; Manusch et al., 2012) underlines the need for improvement of mortality modelling in 4C. Further, new stand-level  
694 approaches regarding light interception have been published (Forrester, 2014), which may improve the modelling of  
695 vertically or horizontally diverse structured mixed forests and ground vegetation.

696 A variety of species-specific parameters should be improved using the TRY database (Kattge et al., 2011) and updated  
697 phenological data. Additionally, further tree species can be parameterized using Bayesian calibration and measurement data  
698 and the TRY database if their use is necessary.

699 Nevertheless, the current version of 4C is applicable for a wide range of research questions related to both process-relevant  
700 aspects and adaptive management and ecosystem services. Using the PROFOUND database enables the comparison with  
701 simulation results of other process-based models using the same database. This includes the potential to gain new insights  
702 into the process understanding of forest growth on the base of such model-intercomparisons.

703

704 Code and data availability. The detailed model description (Lasch-Born et al., 2018), the model source code 4C\_v2.2 (Lasch-  
705 Born et al., 2019) and the simulation results are available in the Gitlab repository <https://gitlab.pik-potsdam.de/foresee/4C>.

706

707 Author contributions. P. Lasch-Born wrote the manuscript with contribution from co-authors, performed simulations,  
708 contributed to data analysis and co-developed the model code, F. Suckow contributed to the manuscript, co-developed the  
709 model code, performed the simulations, and contributed to data analysis. C.O.P. Reyer contributed to the manuscript, M.  
710 Gutsch contributed to the manuscript and co-developed the model code. C. Kollas contributed to the manuscript and co-  
711 developed the model code. R. Grote contributed to the manuscript and co-developed the model code. F.-W. Badeck, H. K.  
712 M. Bugmann, J. Schaber, M. Lindner and C. Fürstenau co-developed the model-code. All authors contributed to the model  
713 description.

714

715 Competing interests. The authors declare that they have no conflict of interest.

716

717 Acknowledgements. This paper was supported partly by the EU project SilviStrat (Silvicultural Strategies to Climatic  
718 Change in Management of European Forests, 2000-2003), the BMBF project OakChain (Nachhaltige Bewirtschaftung von  
719 Eichen-Kiefern-Mischbeständen im subkontinentalen Nordostdeutschen Tiefland, 2005-2009), the EU-funded project  
720 MOTIVE (Models for Adaptive Forest Management, 2009-2013) of the 7th FP, the BMBF project CC-LandStraD (Climate  
721 Change - Land Use Strategies, 2010-2015) the projects WAHYKLAS (Waldhygienische Klimaanpassungsstrategien, 2014-  
722 2017) and DENDROKLIMA (Jahrringanalysen auf dem Telegrafenberg (Potsdam) -Nutzung dendrochronologischer Daten  
723 Deutschlands zur modell-basierten Analyse der Wirkung von Klimaänderungen auf Waldökosysteme, 2016-2019 both  
724 funded by the Waldklimafonds (BMEL, BMU). We thank Ylva Hauf for her great support in preparing figures and data and  
725 Alison Schlums for great editorial help.

## 726 6 References

727 Anderegg, W. R. L., Martinez-Vilalta, J., Cailleret, M., Camarero, J. J., Ewers, B. E., Galbraith, D., Gessler,  
728 A., Grote, R., Huang, C.-y., Levick, S. R., Powell, T. L., Rowland, L., Sánchez-Salguero, R., and Trotsiuk,

729 V.: When a Tree Dies in the Forest: Scaling Climate-Driven Tree Mortality to Ecosystem Water and  
 730 Carbon Fluxes, *Ecosystems*, 1-15, doi:10.1007/s10021-016-9982-1, 2016.  
 731 Badeck, F. W., Beese, F., Berthold, D., Einert, P., Jochheim, H., Kallweit, R., Konopatzky, A., Lasch, P.,  
 732 Meesenburg, H., Meiwes, K.-J., Puhlmann, M., Raspe, S., Schulte-Bisping, H., Schulz, C., and Suckow, F.:  
 733 Parametrisierung, Kalibrierung und Validierung von Modellen des Kohlenstoffumsatzes in  
 734 Waldökosystemen und deren Böden, Bayerische Landesanstalt für Wald und Forstwirtschaft (LWF),  
 735 Institut für Bodenkunde und Waldernährung der Universität Göttingen (IBW), Landesforstanstalt  
 736 Eberswalde (LFE), Leibniz-Zentrum für Agrarlandschaftsforschung (ZALF), Nordwestdeutsche Forstliche  
 737 Versuchsanstalt (NW-FVA), Potsdam-Institut für Klimafolgenforschung (PIK), 110, 2007.  
 738 Baldocchi, D., Chu, H., and Reichstein, M.: Inter-annual variability of net and gross ecosystem carbon  
 739 fluxes: A review, *Agric. For. Meteorol.*, 249, 520-533, doi:10.1016/j.agrformet.2017.05.015, 2018.  
 740 Berninger, F., Coll, L., Vanninen, P., Mäkelä, A., Palmroth, S., and Nikinmaa, E.: Effects of tree size and  
 741 position on pipe model ratios in Scots pine, *Canadian Journal Of Forest Research-Revue Canadienne De*  
 742 *Recherche Forestiere*, 35, 1294-1304, doi:10.1139/X05-055, 2005.  
 743 Borys, A., Lasch, P., Suckow, F., and Reyer, C.: Kohlenstoffspeicherung in Buchenbeständen in  
 744 Abhängigkeit von Waldpflege und Klimawandel, *Allg. Forst- u. J.-Ztg.*, 184, 26-35, 2013.  
 745 Borys, A., Suckow, F., Reyer, C., Gutsch, M., and Lasch-Born, P.: The impact of climate change under  
 746 different thinning regimes on carbon sequestration in a German forest district, *Mitig Adapt Strateg*  
 747 *Glob Change*, 21, 861-881, doi:10.1007/s11027-014-9628-6, 2016.  
 748 Botkin, D.: *Forest Dynamics: An Ecological Model*, Oxford University Press, Oxford & New York, 309  
 749 pp., 1993.  
 750 Brændholt, A., Ibrom, A., Larsen, K. S., and Pilegaard, K.: Partitioning of ecosystem respiration in a  
 751 beech forest, *Agric. For. Meteorol.*, 252, 88-98, doi:10.1016/j.agrformet.2018.01.012, 2018.  
 752 Bugmann, H., Grote, R., Lasch, P., Lindner, M., and Suckow, F.: A new forest gap model to study the  
 753 effects of environmental change on forest structure and functioning, in: *Impacts of Global Change of*  
 754 *Tree Physiology and Forest Ecosystem. Proceedings of the International Conference on Impacts of*  
 755 *Global Change on Tree Physiology and Forest Ecosystems*, held 26-29 November 1996, Wageningen,  
 756 edited by: Mohren, G. M. J., Kramer, K., and Sabate, S., *Forestry Science*, Kluwer Academic Publisher,  
 757 Dordrecht, 255-261, 1997.  
 758 Cameron, D. R., Van Oijen, M., Werner, C., Butterbach-Bahl, K., Grote, R., Haas, E., Heuvelink, G. B. M.,  
 759 Kiese, R., Kros, J., Kuhnert, M., Leip, A., Reinds, G. J., Reuter, H. I., Schelhaas, M. J., De Vries, W., and  
 760 Yeluripati, J.: Environmental change impacts on the C- and N-cycle of European forests: a model  
 761 comparison study, *Biogeosciences*, 10, 1751-1773, doi:10.5194/bg-10-1751-2013, 2013.  
 762 Collalti, A., Perugini, L., Santini, M., Chiti, T., Nole, A., Matteucci, G., and Valentini, R.: A process-based  
 763 model to simulate growth in forests with complex structure: Evaluation and use of 3D-CMCC Forest  
 764 Ecosystem Model in a deciduous forest in Central Italy, *Ecological Modelling*, 272, 362-378,  
 765 10.1016/j.ecolmodel.2013.09.016, 2014.  
 766 Collalti, A., Marconi, S., Ibrom, A., Trotta, C., Anav, A., D'Andrea, E., Matteucci, G., Montagnani, L.,  
 767 Gielen, B., Mammarella, I., Grunwald, T., Knohl, A., Berninger, F., Zhao, Y., Valentini, R., and Santini,  
 768 M.: Validation of 3D-CMCC Forest Ecosystem Model (v.5.1) against eddy covariance data for 10  
 769 European forest sites, *Geosci. Model Dev.*, 9, 479-504, doi:10.5194/gmd-9-479-2016, 2016.  
 770 Collatz, G. J., Ball, J. T., Grivet, C., and Berry, J. A.: Physiological and Environmental-Regulation of  
 771 Stomatal Conductance, Photosynthesis and Transpiration - a Model That Includes a Laminar Boundary-  
 772 Layer, *Agric. For. Meteorol.*, 54, 107-136, doi:10.1016/0168-1923(91)90002-8, 1991.  
 773 Constable, J. V. H., and Friend, A. L.: Suitability of process-based tree growth models for addressing  
 774 tree response to climate change, *Environmental Pollution*, 110, 47-59, doi:10.1016/S0269-  
 775 7491(99)00289-4, 2000.  
 776 Davidson, R. L.: Effect of root/leaf temperature differentials on root/shoot ratios in some pasture  
 777 grasses and clover, *Ann. Bot.*, 33, 561-569, doi:10.1093/oxfordjournals.aob.a084308, 1969.



778 Dietze, M. C., and Matthes, J. H.: A general ecophysiological framework for modelling the impact of  
779 pests and pathogens on forest ecosystems, *Ecol. Lett.*, 17, 1418-1426, doi:10.1111/ele.12345, 2014.

780 DVWK: Ermittlung der Verdunstung von Land- und Wasserflächen, DVWK - Merkblätter zur  
781 Wasserwirtschaft, edited by: Deutscher Verband für Wasserwirtschaft und Kulturbau e. V.,  
782 Wirtschafts- und Verlagsgesellschaft Gas und Wasser mbH Bonn, Bonn, 134 pp., 1996.

783 Dyck, S., and Peschke, G.: Grundlagen der Hydrologie, 3 ed., Verlag für Bauwesen GmbH, Berlin, 536  
784 pp., 1995.

785 Eggers, T.: The impacts of manufacturing and utilization of wood products on the European carbon  
786 budget, European Forest Institute, Joensuu, Internal report 99/90, 2002.

787 Ellenberg, M., Mayer, R., and Schauermaier, J. (Eds.): Ökosystemforschung, Ergebnisse des  
788 Sollingprojekts. 1966 - 1986. , Ulmer Eugen Verlag, 1991.

789 Farquhar, G. D., Caemmerer, S. V., and Berry, J. A.: A Biochemical-Model of Photosynthetic CO<sub>2</sub>  
790 Assimilation in Leaves of C-3 Species, *Planta*, 149, 78-90, doi:10.1007/BF00386231, 1980.

791 Fontes, L., Bontemps, J.-D., Bugmann, H., van Oijen, M., Gracia, C. A., Kramer, K., Lindner, M., Rötzer,  
792 T., and Skovsgaard, J. P.: Models for supporting forest management in a changing environment, *For.*  
793 *Syst.*, 19, 8-9, 2010.

794 Forrester, D. I.: A stand-level light interception model for horizontally and vertically heterogeneous  
795 canopies, *Ecological Modelling*, 276, 14-22, doi:10.1016/j.ecolmodel.2013.12.021, 2014.

796 Fürstenau, C., Badeck, F., Lasch, P., Lexer, M., Lindner, M., Mohr, P., and Suckow, F.: Multiple-use  
797 forest management in consideration of climate change and the interests of stakeholder groups,  
798 *European Journal of Forest Research*, 126, 225-239, doi:10.1007/s10342-006-0114-x, 2007.

799 Granier, A., Reichstein, M., Breda, N., Janssens, I. A., Falge, E., Ciais, P., Grunwald, T., Aubinet, M.,  
800 Berbigier, P., Bernhofer, C., Buchmann, N., Facini, O., Grassi, G., Heinesch, B., Ilvesniemi, H., Keronen,  
801 P., Knohl, A., Kostner, B., Lagergren, F., Lindroth, A., Longdoz, B., Loustau, D., Mateus, J., Montagnani,  
802 L., Nys, C., Moors, E., Papale, D., Peiffer, M., Pilegaard, K., Pita, G., Pumpanen, J., Rambal, S., Rebmann,  
803 C., Rodrigues, A., Seufert, G., Tenhunen, J., Vesala, T., and Wang, Q.: Evidence for soil water control on  
804 carbon and water dynamics in European forests during the extremely dry year: 2003, *Agric. For.*  
805 *Meteorol.*, 143, 123-145, doi:10.1016/j.agrformet.2006.12.004, 2007.

806 Grote, R., and Suckow, F.: Integrating dynamic morphological properties into forest growth modeling.  
807 I. Effects on water balance and gas exchange, *For. Ecol. Manage.*, 112, 101-119, doi:10.1016/S0378-  
808 1127(98)00329-6, 1998.

809 Grote, R., Suckow, F., and Bellmann, K.: Modelling of carbon-, nitrogen-, and water balances in pine  
810 stands under changing air pollution and deposition, in: *Changes of Atmospheric Chemistry and Effects*  
811 *on Forest Ecosystems. A Roof Experiment Without Roof*, edited by: Hüttel, R. F., and Bellmann, K.,  
812 *Nutrients in Ecosystems*, Kluwer, Dordrecht, 251-281, 1998.

813 Grote, R., Korhonen, J., and Mammarella, I.: Challenges for evaluating process-based models of gas  
814 exchange at forest sites with fetches of various species, *For. Syst.*, 20, 389-406,  
815 doi:10.5424/fs/20112003-11084, 2011.

816 Gutsch, M., Lasch-Born, P., Lüttger, A. B., Suckow, F., Murawski, A., and Pilz, T.: Uncertainty of biomass  
817 contributions from agriculture and forestry to renewable energy resources under climate change,  
818 *Meteorologische Zeitschrift*, 24, 1-11, doi: 10.1127/metz/2015/0532, 2015a.

819 Gutsch, M., Lasch-Born, P., Suckow, F., and Reyer, C.: Modeling of Two Different Water Uptake  
820 Approaches for Mono- and Mixed-Species Forest Stands, *Forests*, 6, 2125-2147,  
821 doi:10.3390/f6062125, 2015b.

822 Gutsch, M., Lasch-Born, P., Suckow, F., and Reyer, C. P. O.: Evaluating the productivity of four main  
823 tree species in Germany under climate change with static reduced models, *Annals of Forest Science*,  
824 73, 401-410, doi:10.1007/s13595-015-0532-3, 2016.

825 Gutsch, M., Lasch-Born, P., Kollas, C., Suckow, F., and Reyer, C. O. P.: Balancing trade-offs between  
826 ecosystem services in Germany's forests under climate change., *Environmental Research Letters*, 13,  
827 045012, doi:10.1088/1748-9326/aab4e5, 2018.



828 Haas, E., Klatt, S., Frohlich, A., Kraft, P., Werner, C., Kiese, R., Grote, R., Breuer, L., and Butterbach-Bahl,  
829 K.: LandscapeDNDC: a process model for simulation of biosphere-atmosphere-hydrosphere exchange  
830 processes at site and regional scale, *Landscape Ecology*, 28, 615-636, 10.1007/s10980-012-9772-x,  
831 2013.

832 Haataja, J., and Vesala, T. (Eds.): SMEAR II. Station for measuring forest ecosystem - atmosphere  
833 relation, University of Helsinki, Department of Forest Ecology, Helsinki, 1997.

834 Hauskeller-Bullerjahn, K.: Wachstum junger Eichen unter Schirm, Forschungszentrum Waldökosysteme  
835 der Universität Göttingen, Göttingen, Berichte des Forschungszentrums Waldökosysteme, Reihe A Bd.  
836 147, 1997.

837 Haxeltine, A., and Prentice, I. C.: BIOME3: An equilibrium terrestrial biosphere model based on  
838 ecophysiological constraints, resource availability and competition among plant functional types,  
839 *Global Biogeochemical Cycles*, 10, 693-709, doi:10.1029/96GB02344, 1996a.

840 Haxeltine, A., and Prentice, I. C.: A general model for the light-use efficiency of primary production,  
841 *Functional Ecology*, 10, 551-561, doi:10.2307/2390165, 1996b.

842 Hoch, G., Richter, A., and Körnner, C.: Non-structural carbon compounds in temperate forest trees,  
843 *Plant, Cell & Environment*, 26, 1067-1081, doi:10.1046/j.0016-8025.2003.01032.x, 2003.

844 Horemans, J., A., Henrot, A., Delire, C., Kollas, C., Lasch-Born, P., Reyer, C., Suckow, F., François, L., and  
845 Ceulemans, R.: Combining multiple statistical methods to evaluate the performance of process-based  
846 vegetation models across three forest stands, *Central European Forestry Journal*, 63, 153-172,  
847 doi:10.1515/forj-2017-0025, 2017.

848 Ibrom, A.: Die biophysikalische Steuerung der Kohlenstoffbilanz in einem Fichtenbestand im Solling,  
849 Habilitationsschrift, Berichte des Forschungszentrums Waldökosysteme der Universität Göttingen,  
850 Reihe A, 236 Seiten, 2001.

851 Jansson, P.-E.: Simulation model for soil water and heat conditions. Description of the SOIL model,  
852 Report, Swedish University of Agricultural Sciences, Department of Soil Sciences, Division of  
853 Agricultural Hydrotechnics, Uppsala, 1991.

854 Karjalainen, T., S., K., and A., P.: Role of wood-based products in absorbing atmospheric carbon, *Silva*  
855 *Fennica*, 28, 67-80, 1994.

856 Kartschall, T., Döring, P., and Suckow, F.: Simulation of Nitrogen, Water and Temperature Dynamics in  
857 Soil, *Syst. Anal. Model. Simul.*, 7, 33-40, 1990.

858 Kattge, J., Diaz, S., Lavorel, S., Prentice, C., Leadley, P., Bonisch, G., Garnier, E., Westoby, M., Reich, P.  
859 B., Wright, I. J., Cornelissen, J. H. C., Violle, C., Harrison, S. P., van Bodegom, P. M., Reichstein, M.,  
860 Enquist, B. J., Soudzilovskaia, N. A., Ackerly, D. D., Anand, M., Atkin, O., Bahn, M., Baker, T. R.,  
861 Baldocchi, D., Bekker, R., Blanco, C. C., Blonder, B., Bond, W. J., Bradstock, R., Bunker, D. E., Casanoves,  
862 F., Cavender-Bares, J., Chambers, J. Q., Chapin, F. S., Chave, J., Coomes, D., Cornwell, W. K., Craine, J.  
863 M., Dobrin, B. H., Duarte, L., Durka, W., Elser, J., Esser, G., Estiarte, M., Fagan, W. F., Fang, J.,  
864 Fernandez-Mendez, F., Fidelis, A., Finegan, B., Flores, O., Ford, H., Frank, D., Freschet, G. T., Fyllas, N.  
865 M., Gallagher, R. V., Green, W. A., Gutierrez, A. G., Hickler, T., Higgins, S. I., Hodgson, J. G., Jalili, A.,  
866 Jansen, S., Joly, C. A., Kerkhoff, A. J., Kirkup, D., Kitajima, K., Kleyer, M., Klotz, S., Knops, J. M. H.,  
867 Kramer, K., Kuhn, I., Kurokawa, H., Laughlin, D., Lee, T. D., Leishman, M., Lens, F., Lenz, T., Lewis, S. L.,  
868 Lloyd, J., Llusia, J., Louault, F., Ma, S., Mahecha, M. D., Manning, P., Massad, T., Medlyn, B. E., Messier,  
869 J., Moles, A. T., Muller, S. C., Nadrowski, K., Naeem, S., Niinemets, U., Nollert, S., Nuske, A., Ogaya, R.,  
870 Oleksyn, J., Onipchenko, V. G., Onoda, Y., Ordonez, J., Overbeck, G., Ozinga, W. A., Patino, S., Paula, S.,  
871 Pausas, J. G., Penuelas, J., Phillips, O. L., Pillar, V., Poorter, H., Poorter, L., Poschlod, P., Prinzing, A.,  
872 Proulx, R., Rammig, A., Reinsch, S., Reu, B., Sack, L., Salgado-Negre, B., Sardans, J., Shiodera, S.,  
873 Shipley, B., Siefert, A., Sosinski, E., Soussana, J. F., Swaine, E., Swenson, N., Thompson, K., Thornton, P.,  
874 Waldram, M., Weiher, E., White, M., White, S., Wright, S. J., Yguel, B., Zaehle, S., Zanne, A. E., and  
875 Wirth, C.: TRY - a global database of plant traits, *Global Change Biology*, 17, 2905-2935,  
876 doi:10.1111/j.1365-2486.2011.02451.x, 2011.

877 Keane, R. E., Morgan, P., and Running, S. W.: FIRE-BGC - A mechanistic ecological process model for  
 878 simulating fire succession on coniferous forest landscapes of the northern Rocky Mountains, United  
 879 States Department of Agriculture, Forest Service, Intermountain Research Station, Ogden, UT,  
 880 Research Paper INT-RP-484, 1996.

881 Keenan, T. F., Baker, I., Barr, A., Ciais, P., Davis, K., Dietze, M., Dragoni, D., Gough, C. M., Grant, R.,  
 882 Hollinger, D., Hufkens, K., Poulter, B., McCaughey, H., Raczka, B., Ryu, Y., Schaefer, K., Tian, H.,  
 883 Verbeeck, H., Zhao, M., and Richardson, A. D.: Terrestrial biosphere model performance for inter-  
 884 annual variability of land-atmosphere CO<sub>2</sub> exchange, *Global Change Biology*, 18, 1971-1987,  
 885 doi:10.1111/j.1365-2486.2012.02678.x, 2012.

886 Kingston, D. G., Todd, M. C., Taylor, R. G., Thompson, J. R., and Arnell, N. W.: Uncertainty in the  
 887 estimation of potential evapotranspiration under climate change, *Geophysical Research Letters*, 36,  
 888 doi:10.1029/2009GL040267, 2009.

889 Kint, V., Lasch, P., Lindner, M., and Muys, B.: Multipurpose conversion management of Scots pine  
 890 towards mixed oak-birch stands--A long-term simulation approach, *For. Ecol. Manage.*, 257, 199-214,  
 891 doi:10.1016/j.foreco.2008.08.031, 2009.

892 Koitzsch, R., and Günther, R.: Modell zur ganzjährigen Simulation der Verdunstung und der  
 893 Bodenfeuchte landwirtschaftlicher Nutzflächen mit und ohne Bewuchs, *Arch. Acker- Pflanzenbau*  
 894 *Bodenkd*, 34, 803-810, 1990.

895 Kollas, C., Gutsch, M., Hommel, R., Lasch-Born, P., and Suckow, F.: Mistletoe-induced growth  
 896 reductions at the forest stand scale, *Tree Physiol*, 38, 1-10, doi:10.1093/treephys/tpx150, 2018.

897 Kramer, K., Leinonen, I., Bartelink, H. H., Berbigier, P., Borghetti, M., Bernhofer, C., Cienciala, E.,  
 898 Dolman, A. J., Froer, O., Gracia, C. A., Granier, A., Grunwald, T., Hari, P., Jans, W., Kellomaki, S.,  
 899 Loustau, D., Magnani, F., Markkanen, T., Matteucci, G., Mohren, G. M. J., Moors, E., Nissinen, A.,  
 900 Peltola, H., Sabate, S., Sanchez, A., Sontag, M., Valentini, R., and Vesala, T.: Evaluation of six process-  
 901 based forest growth models using eddy-covariance measurements of CO<sub>2</sub> and H<sub>2</sub>O fluxes at six forest  
 902 sites in Europe, *Global Change Biology*, 8, 213-230, doi:10.1046/j.1365-2486.2002.00471.x, 2002.

903 Lagergren, F., Lindroth, A., Dellwik, E., Ibrom, A., Lankreijer, H., Launiainen, S., MÖlder, M., Kolari, P.,  
 904 Pilegaard, K. I. M., and Vesala, T.: Biophysical controls on CO<sub>2</sub> fluxes of three Northern forests based on  
 905 long-term eddy covariance data, *Tellus B*, 60, 143-152, doi:10.1111/j.1600-0889.2006.00324.x, 2008.

906 Landsberg, J.: Modelling forest ecosystems: state of the art, challenges, and future directions,  
 907 *Canadian Journal of Forest Research-Revue Canadienne De Recherche Forestiere*, 33, 385-397, 2003.

908 Landsberg, J. J., and Waring, R. H.: A Generalised Model of Forest Productivity Using Simplified  
 909 Concepts of Radiation-Use Efficiency, Carbon Balance and Partitioning, *Forest Ecology & Management*,  
 910 95, 209-228, doi:10.1016/S0378-1127(97)00026-1, 1997.

911 Lasch-Born, P., Suckow, F., Gutsch, M., Reyer, C., Hauf, Y., Murawski, A., and Pilz, T.: Forests under  
 912 climate change: potential risks and opportunities, *Meteorologische Zeitschrift*, 24, 157-172,  
 913 doi:10.1127/metz/2014/0526, 2015.

914 Lasch-Born, P., Suckow, F., Badeck, F.-W., Schaber, J., Bugmann, H., Fürstenau, C., Gutsch, M., Kollas,  
 915 C., and Reyer, C. P. O.: 4C model description, PIK, Potsdam, 133,  
 916 <https://dx.doi.org/10.2312/pik.2018.006>, 2018.

917 Lasch-Born, P., Suckow, F., Gutsch, M., Kollas, C., Badeck, F.-W., Bugmann, H., Grote, R., Fürstenau, C.,  
 918 Schaber, J., Lindner, M., and Reyer, C.: FORESEE - 4C. V. 2.2. , GFZ Data Services, Potsdam,  
 919 <http://doi.org/10.5880/PIK.2019.015>, 2019.

920

921 Lasch, P., Badeck, F.-W., Lindner, M., and Suckow, F.: Sensitivity of simulated forest growth to changes  
 922 in climate and atmospheric CO<sub>2</sub>, *Forstwiss. Centralblatt*, 121, Supplement 1, 155-171, 2002.

923 Lasch, P., Badeck, F. W., Suckow, F., Lindner, M., and Mohr, P.: Model-based analysis of management  
 924 alternatives at stand and regional level in Brandenburg (Germany), *For. Ecol. Manage.*, 207, 59-74,  
 925 doi:10.1016/j.foreco.2004.10.034, 2005.

926 Lasch, P., Suckow, F., and Badeck, F.-W.: Analyses of forest ecosystems' response to climate change at  
 927 level II monitoring sites, in: Symposium: Forests in a Changing Environment - Results of 20 years ICP  
 928 Forests Monitoring Göttingen, 25.-28.10.2006, edited by: Eichhorn, J., Schriften aus der Forstlichen  
 929 Fakultät der Universität Göttingen und der Nordwestdeutschen Forstlichen Versuchsanstalt, J.D.  
 930 Sauerländer's Verlag Frankfurt am Main, Göttingen, 136-141, 2007.

931 Lasch, P., Kollas, C., Rock, J., and Suckow, F.: Potentials and impacts of short-rotation coppice  
 932 plantation with aspen in Eastern Germany under conditions of climate change, *Reg Environ Change*,  
 933 10, 83-94, doi:10.1007/s10113-009-0095-7, 2010.

934 Lindner, M.: Developing adaptive forest management strategies to cope with climate change, *Tree*  
 935 *Physiol.*, 20, 299-307, doi:10.1093/treephys/20.5-6.299, 2000.

936 Lindner, M., Lasch, P., Badeck, F.-W., Beguiristain, P. P., Junge, S., Kellomäki, S., Peltola, H., Gracia, C.,  
 937 Sabate, S., Jäger, D., Lexer, M., and Freeman, M.: Chapter 4: SilviStrat Model Evaluation Exercises, in:  
 938 Management of European Forests under Changing Climatic Conditions, edited by: Kellomäki, S., and  
 939 Leinonen, S., University of Joensuu, Faculty of Forestry, Joensuu, 117-157, 2005.

940 Loague, K., and Green, R. E.: Statistical and graphical methods for evaluating solute transport models:  
 941 Overview and application, *Journal of Contaminant Hydrology*, 7, 51, doi:10.1016/0169-7722(91)90038-  
 942 3, 1991.

943 Mäkelä, A.: Modeling structural-functional relationships in whole-tree growth: resource allocation, in:  
 944 Process modeling of forest growth responses to environmental stress, edited by: Dixon, R. K., Meldahl,  
 945 R. S., Ruark, G. A., and Warren, W. G., Timber Press, Portland, Oregon, 81-95, 1990.

946 Mäkelä, A., Landsberg, J., Ek, A. R., Burk, T. E., Ter-Mikaelian, M., Agren, G. I., Oliver, C. D., and  
 947 Puttonen, P.: Process-based models for forest ecosystem management: current state of the art and  
 948 challenges for practical implementation, *Tree Physiol.*, 20, 289-298, 2000a.

949 Mäkelä, A., Sievänen, R., Lindner, M., and Lasch, P.: Application of volume growth and survival graphs  
 950 in the evaluation of four process-based forest growth models, *Tree Physiol.*, 20, 347-355,  
 951 doi:10.1093/treephys/20.5-6.347, 2000b.

952 Manusch, C., Bugmann, H., Heiri, C., and Wolf, A.: Tree mortality in dynamic vegetation models - A key  
 953 feature for accurately simulating forest properties, *Ecological Modelling*, 243, 101-111,  
 954 doi:10.1016/j.ecolmodel.2012.06.008, 2012.

955 Mayer, D. G., and Butler, D. G.: Statistical Validation, *Ecological Modelling*, 68, 21-32,  
 956 doi:10.1016/0304-3800(93)90105-2, 1993.

957 Medlyn, B. E., Berbigier, P., Clement, R., Grelle, A., Loustau, D., Linder, S., Wingate, L., Jarvis, P. G.,  
 958 Sigurdsson, B. D., and McMurtrie, R. E.: Carbon balance of coniferous forests growing in contrasting  
 959 climates: Model-based analysis, *Agric. For. Meteorol.*, 131, 97-124,  
 960 doi:10.1016/j.agrformet.2005.05.004, 2005a.

961 Medlyn, B. E., Robinson, A. P., Clement, R., and McMurtrie, R. E.: On the validation of models of forest  
 962 CO<sub>2</sub> exchange using eddy covariance data: some perils and pitfalls, *Tree Physiol.*, 25, 839-857,  
 963 doi:10.1093/treephys/25.7.839, 2005b.

964 Medlyn, B. E., Duursma, R. A., and Zeppel, M. J. B.: Forest productivity under climate change: a  
 965 checklist for evaluating model studies, *Wiley Interdisciplinary Reviews: Climate Change*, 2, 332-355,  
 966 doi:10.1002/wcc.108, 2011.

967 Meinshausen, M., Smith, S. J., Calvin, K., Daniel, J. S., Kainuma, M. L. T., Lamarque, J. F., Matsumoto, K.,  
 968 Montzka, S. A., Raper, S. C. B., Riahi, K., Thomson, A., Velders, G. J. M., and van Vuuren, D. P. P.: The  
 969 RCP greenhouse gas concentrations and their extensions from 1765 to 2300, *Clim. Change*, 109, 213-  
 970 241, doi:10.1007/s10584-011-0156-z, 2011.

971 Minunno, F., Peltoniemi, M., Launiainen, S., Aurela, M., Lindroth, A., Lohila, A., Mammarella, I.,  
 972 Minkkinen, K., and Mäkelä, A.: Calibration and validation of a semi-empirical flux ecosystem model for  
 973 coniferous forests in the Boreal region, *Ecological Modelling*, 341, 37-52,  
 974 doi:10.1016/j.ecolmodel.2016.09.020, 2016.

975 Molina-Herrera, S., Grote, R., Santabárbara-Ruiz, I., Kraus, D., Klatt, S., Haas, E., Kiese, R., and  
 976 Butterbach-Bahl, K.: Simulation of CO<sub>2</sub> Fluxes in European Forest Ecosystems with the Coupled Soil-  
 977 Vegetation Process Model “LandscapeDNDC”, *Forests*, 6, 1779-1809, doi:0.3390/f6061779, 2015.

978 Monsi, M., and Saeki, T.: On the Factor Light in Plant Communities and its Importance for Matter  
 979 Production, *Annals of Botany*, 95, 549-567, doi:10.1093/aob/mci052, 2005.

980 Monteith, J. L., and Unsworth, M. H.: *Principles of environmental physics*, second ed., Edward Arnold,  
 981 London, 1990.

982 Nakicenovic, N.: Greenhouse gas emissions scenarios, *Technological Forecasting and Social Change*,  
 983 65, 149-166, doi:10.1016/s0040-1625(00)00094-9, 2000.

984 Neumann, M., Mues, V., Moreno, A., Hasenauer, H., and Seidl, R.: Climate variability drives recent tree  
 985 mortality in Europe, *Global Change Biology*, 23, 4788-4797, doi:10.1111/gcb.13724, 2017.

986 Peltoniemi, M., Pulkkinen, M., Aurela, M., Pumpanen, J., Kolari, P., and Makela, A.: A semi-empirical  
 987 model of boreal-forest gross primary production, evapotranspiration, and soil water - calibration and  
 988 sensitivity analysis, *Boreal Environ. Res.*, 20, 151-171, 2015.

989 Pilegaard, K., Hummelshoj, P., Jensen, N. O., and Chen, Z.: Two years of continuous CO<sub>2</sub> eddy-flux  
 990 measurements over a Danish beech forest, *Agric. For. Meteorol.*, 107, 29-41, doi:10.1016/s0168-  
 991 1923(00)00227-6, 2001.

992 Pilegaard, K., Ibrom, A., Courtney, M. S., Hummelshoj, P., and Jensen, N. O.: Increasing net CO<sub>2</sub> uptake  
 993 by a Danish beech forest during the period from 1996 to 2009, *Agric. For. Meteorol.*, 151, 934-946,  
 994 doi:10.1016/j.agrformet.2011.02.013, 2011.

995 Porte, A., and Bartelink, H. H.: Modelling mixed forest growth: a review of models for forest  
 996 management, *Ecological Modelling*, 150, 141-188, doi:10.1016/S0304-3800(01)00476-8, 2002.

997 Post, J., Krysanova, V., Suckow, F., Mirschel, W., Rogasik, J., and Merbach, I.: Integrated  
 998 ecohydrological modelling of soil organic matter dynamics for the assessment of environmental  
 999 change impacts in meso- to macro-scale river basins, *Ecological Modelling*, 206, 93-109,  
 1000 doi:10.1016/j.ecolmodel.2007.03.028, 2007.

1001 Pretzsch, H., Grote, R., Reineking, B., Rotzer, T., and Seifert, S.: Models for forest ecosystem  
 1002 management: A European perspective, *Annals Of Botany*, 101, 1065-1087, doi:10.1093/aob/mcm246,  
 1003 2008.

1004 Pretzsch, H.: *Forest Dynamics, Growth and Yield*, Springer Berlin, Germany, 664 pp., 2010.

1005 Priestley, C. H. B., and Taylor, R. J.: On the assessment of surface heat flux and evaporation using large-  
 1006 scale parameters, *Monthly weather review*, 100, 81-92, doi:10.1175/1520-  
 1007 0493(1972)100<0081:OTAOSH>2.3.CO;2, 1972.

1008 Rannik, Ü., Kolari, P., Vesala, T., and Hari, P.: Uncertainties in measurement and modelling of net  
 1009 ecosystem exchange of a forest, *Agric. For. Meteorol.*, 138, 244-257,  
 1010 doi:10.1016/j.agrformet.2006.05.007, 2006.

1011 Reyer, C., Lasch, P., Mohren, G. M. J., and Sterck, F. J.: Inter-specific competition in mixed forests of  
 1012 Douglas-fir (*Pseudotsuga menziesii*) and common beech (*Fagus sylvatica*) under climate change - a  
 1013 model-based analysis, *Annals Of Forest Science*, 67, doi:10.1051/forest/2010041, 2010.

1014 Reyer, C., Lasch-Born, P., Suckow, F., Gutsch, M., Murawski, A., and Pilz, T.: Projections of regional  
 1015 changes in forest net primary productivity for different tree species in Europe driven by climate  
 1016 change and carbon dioxide, *Annals Of Forest Science*, 71, 211-225, doi:10.1007/s13595-013-0306-8,  
 1017 2014.

1018 Reyer, C.: Forest Productivity Under Environmental Change—a Review of Stand-Scale Modeling  
 1019 Studies, *Curr Forestry Rep*, 1-16, doi:10.1007/s40725-015-0009-5, 2015.

1020 Reyer, C., Silveyra Gonzalez, R., Dolos, K., Hartig, F., Hauf, Y., Noack, M., Lasch-Born, P., Rötzer, T.,  
 1021 Pretzsch, H., Meesenburg, H., Fleck, S., Wagner, M., Bolte, A., Sanders, T., Kolari, P., Mäkelä, A., Vesala,  
 1022 T., Mammarella, I., Pumpanen, J., Matteucci, G., Collalti, A., D’Andrea, E., Krupkova, L., Krejza, J.,  
 1023 Ibrom, A., Pilegaard, K., Loustau, D., Bonnefond, J.-M., Berbigier, P., Picart, D., Lafont, S., Dietze, M.,  
 1024 Cameron, D., Vieno, M., Tian, H., Palacios, A., Cicuendez, V., Büchner, M., Lange, S., Volkholz, J., Kim,

1025 H., Horemans, J., Martel, S., Bohn, F., Steinkamp, J., Suckow, F., Weedon, G., Sheffield, J., Chikalanov,  
1026 A., and Frieler, K.: The PROFOUND database for evaluating vegetation models and simulating climate  
1027 impacts on forests V. 0.1.12, GFZ Data Services, <http://doi.org/10.5880/PIK.2019.008>, 2019.

1028 Reyer, C., Silveyra Gonzalez, R., Dolos, K., Hartig, F., Hauf, Y., Noack, M., Lasch-Born, P., Rötzer, T.,  
1029 Pretzsch, H., Meesenburg, H., Fleck, S., Wagner, M., Bolte, A., Sanders, T., Kolari, P., Mäkelä, A., Vesala,  
1030 T., Mammarella, I., Pumpanen, J., Matteucci, G., Collalti, A., D'Andrea, E., Krupkova, L., Krejza, J.,  
1031 Ibrom, A., Pilegaard, K., Loustau, D., Bonnefond, J.-M., Berbigier, P., Picart, D., Lafont, S., Dietze, M.,  
1032 Cameron, D., Vieno, M., Tian, H., Palacios, A., Cicuendez, V., Büchner, M., Lange, S., Volkholz, J., Kim,  
1033 H., Horemans, J., Martel, S., Bohn, F., Steinkamp, J., Suckow, F., Weedon, G., Sheffield, J., Chikalanov,  
1034 A., and Frieler, K.: The PROFOUND databa for evaluating vegetation models and simulating climate  
1035 impacts on forests, Earth System Science Data, in preparation.

1036 Reyer, C. P. O., Flechsig, M., Lasch-Born, P., and van Oijen, M.: Integrating parameter uncertainty of a  
1037 process-based model in assessments of climate change effects on forest productivity, *Clim. Change*,  
1038 137, 395-409, doi:10.1007/s10584-016-1694-1, 2016.

1039 Robinson, A. P., Duursma, R. A., and Marshall, J. D.: A regression-based equivalence test for model  
1040 validation: shifting the burden of proof, *Tree Physiol.*, 25, 903-913, doi:10.1093/treephys/25.7.903,  
1041 2005.

1042 Russ, A., and Riek, W.: Pedotransferfunktionen zur Ableitung der nutzbaren Feldkapazität –  
1043 Validierung für Waldböden des nordostdeutschen Tieflands, *Waldökologie, Landschaftsforschung und*  
1044 *Naturschutz*, 5-17, 2011.

1045 Schaber, J.: Phenology in Germany in the 20th century: methods, analyses and models, *Math.-Nat.*  
1046 *Fakultät, Universität Potsdam, Potsdam*, 164 pp., 2002.

1047 Schaber, J., and Badeck, F.-W.: Physiology based phenology models for forest tree species in Germany,  
1048 *Intern. J. Biometeorol.*, 47, 193-201, doi:10.1007/s00484-003-0171-5, 2003.

1049 Schall, P.: Ein Ansatz zur Modellierung der Naturverjüngungsprozesse im Bergmischwald der östlichen  
1050 bayrischen Alpen, *Forschungszentrum Waldökosysteme, GöttingenReihe A Bd 155*, 1998.

1051 Seidl, R., Rammer, W., Lasch, P., Badeck, F. W., and M.J., L.: Does conversion of even-aged, secondary  
1052 coniferous forest affect carbon sequestration? A simulation study under changing environmental  
1053 conditions, *Silva Fennica*, 42, 369-386, doi:10.14214/sf.243, 2008.

1054 Seidl, R., Fernandes, P. M., Fonseca, T. F., Gillet, F., Jönsson, A. M., Merganicová, K., Netherer, S.,  
1055 Arpaci, A., Bontemps, J.-D., Bugmann, H., González-Olabarria, J. R., Lasch, P., Meredieu, C., Moreira, F.,  
1056 Schelhaas, M.-J., and Mohren, F.: Modelling natural disturbances in forest ecosystems: a review,  
1057 *Ecological Modelling*, 222, 903-924, doi: 10.1016/j.ecolmodel.2010.09.040, 2011.

1058 Shinozaki, K., Yoda, K., Hozumi, K., and Kira, T.: A quantitative analysis of plant form - the pipe model  
1059 theory. I. Basic analysis., *Jap. J. of Ecology*, 14, 97-105, 1964.

1060 Smith, B., Wårlind, D., Arneth, A., Hickler, T., Leadley, P., Siltberg, J., and Zaehle, S.: Implications of  
1061 incorporating N cycling and N limitations on primary production in an individual-based dynamic  
1062 vegetation model, *Biogeosciences*, 11, 2027-2054, 10.5194/bg-11-2027-2014, 2014.

1063 Smith, P., Smith, J. U., Powlson, D. S., McGill, W. B., Arah, J. R. M., Chertov, O. G., Coleman, K., Franko,  
1064 U., Frolking, S., Jenkinson, D. S., Jensen, L. S., Kelly, R. H., Klein-Gunnewiek, H., Komarov, A. S., Li, C.,  
1065 Molina, J. A. E., Mueller, T., Parton, W. J., Thornley, J. H. M., and Whitmore, A. P.: A comparison of the  
1066 performance of nine soil organic matter models using datasets from seven long-term experiments,  
1067 *Geoderma*, 81, 153-225, doi:10.1016/S0016-7061(97)00087-6, 1997.

1068 Suckow, F.: Ein Modell zur Berechnung der Bodentemperatur unter Brache und unter  
1069 Pflanzenbestand, *Akademie der Landwirtschaftswissenschaften der DDR, Berlin*, 1986.

1070 Suckow, F., Badeck, F.-W., Lasch, P., and Schaber, J.: Nutzung von Level-II-Beobachtungen für Test und  
1071 Anwendungen des Sukzessionsmodells FORESEE, *Beitr. Forstwirtsch. u. Landsch.ökol.*, 35, 84-87, 2001.

1072 Suckow, F., Lasch-Born, P., Gerstengarbe, F.-W., Werner, P., and Reyer, C. P. O.: Climate change  
1073 impacts on a pine stand in Central Siberia, *Reg Environ Change*, 16, 1671-1683, doi:10.1007/s10113-  
1074 015-0915-x, 2016.

1075 Van Hees, A. F. M.: Growth and Morphology of Pedunculate Oak (*Quercus Robur* L) and Beech (*Fagus*  
1076 *Sylvatica* L) Seedlings in Relation to Shading and Drought, *Annales des Sciences Forestieres*, 54, 9-18,  
1077 doi:10.1051/forest:19970102, 1997.

1078 van Oijen, M., Reyer, C., Bohn, F. J., Cameron, D. R., Deckmyn, G., Flechsig, M., Härkönen, S., Hartig, F.,  
1079 Huth, A., Kiviste, A., Lasch, P., Mäkelä, A., Mette, T., Minunno, F., and Rammer, W.: Bayesian  
1080 calibration, comparison and averaging of six forest models, using data from Scots pine stands across  
1081 Europe, *For. Ecol. Manage.*, 289, 255-268, doi:10.1016/j.foreco.2012.09.043, 2013.

1082 Vetter, M., Churkina, G., Jung, M., Reichstein, M., Zaehle, S., Bondeau, A., Chen, Y., Ciais, P., Feser, F.,  
1083 Freibauer, A., Geyer, R., Jones, C., Papale, D., Tenhunen, J., Tomelleri, E., Trusilova, K., Viovy, N., and  
1084 Heimann, M.: Analyzing the causes and spatial pattern of the European 2003 carbon flux anomaly  
1085 using seven models, *Biogeosciences*, 5, 561-583, doi:10.5194/bg-5-561-2008, 2008.

1086 Waring, R. H., Landsberg, J. J., and Williams, M.: Net Primary Production of Forests - a Constant  
1087 Fraction of Gross Primary Production?, *Tree Physiol.*, 18, 129-134, doi:10.1093/treephys/18.2.129,  
1088 1998.

1089 Wösten, J. H. M., Pachepsky, Y. A., and Rawls, W. J.: Pedotransfer functions: bridging the gap between  
1090 available basic soil data and missing soil hydraulic characteristics, *Journal of Hydrology*, 251, 123-150,  
1091 doi:10.1016/S0022-1694(01)00464-4, 2001.

1092 Wu, S. H., Jansson, P.-E., and Kolari, P.: Modeling seasonal course of carbon fluxes and  
1093 evapotranspiration in response to low temperature and moisture in a boreal Scots pine ecosystem,  
1094 *Ecological Modelling*, 222, 3103-3119, doi:10.1016/j.ecolmodel.2011.05.023, 2011.

1095 Wu, S. H., Jansson, P.-E., and Kolari, P.: The role of air and soil temperature in the seasonality of  
1096 photosynthesis and transpiration in a boreal Scots pine ecosystem, *Agric. For. Meteorol.*, 156, 85-103,  
1097 doi:10.1016/j.agrformet.2012.01.006, 2012.

1098
