# Supplementary material for: Description and evaluation of the process-based forest model 4C at four European forest sites
Source: Copernicus journal article supplement (doi:10.5194/gmd-2019-2), 2019-01-15
Supplement: Supplementary file [file gmd-2019-2-AC1-supplement.zip]

# 1 S1 OVERVIEW ABOUT 4C APPLICATIONS

## 2 Table S1 Applications of the model 4C

| Publication                 | Region                                                                              | Analysis                                                                                                                                                                                                 | Results                                                                                                                                                                                                                                                                                                      |
|-----------------------------|-------------------------------------------------------------------------------------|----------------------------------------------------------------------------------------------------------------------------------------------------------------------------------------------------------|--------------------------------------------------------------------------------------------------------------------------------------------------------------------------------------------------------------------------------------------------------------------------------------------------------------|
| (Lasch et al., 2002)        | Pine stand in Brandenburg, several 24 pine, spruce, oak and beech stands in Germany | Sensitivity study regarding climate and growth analysis under climate change                                                                                                                             | Water limitation effects for forest growth in German temperate forests are important and an increasing direct effect of rising temperatures at higher elevation sites is shown.                                                                                                                              |
| (Gerstengarbe et al., 2003) | Brandenburg/ Germany                                                                | Effects of climate change on carbon budget and water balance of forests in Brandenburg using 461 forest stands and one climate scenario                                                                  | The effects of climate change were stronger for the water balance than for the carbon budget due to the assumed climate scenario.                                                                                                                                                                            |
| (Badeck et al., 2005)       | Management unit in Brandenburg/ Germany                                             | Application of adaptive forest management strategies and climate scenarios to a management unit in Brandenburg                                                                                           | <ul style="list-style-type: none"> <li>- The effect of choosing alternative treatment programs on harvested wood volumes can be smaller or higher than the climate change impact.</li> <li>- Both the alternative treatment programs and climate change increased the volume of harvested timber.</li> </ul> |
| (Fürstenau et al., 2007)    | Management unit in Brandenburg/ Germany                                             | Evaluation of alternative management strategies at the forest management unit level under current climate and under transient climate change conditions over a planning period of 100 years. Application | <ul style="list-style-type: none"> <li>- Climate change increases carbon sequestration and income from timber production due to increased stand productivity.</li> <li>- Forest manager in public-owned</li> </ul>                                                                                           |

| Publication             | Region                                                                 | Analysis                                                                                                                                    | Results                                                                                                                                                                                                                                                                                                                                                                                                                           |
|-------------------------|------------------------------------------------------------------------|---------------------------------------------------------------------------------------------------------------------------------------------|-----------------------------------------------------------------------------------------------------------------------------------------------------------------------------------------------------------------------------------------------------------------------------------------------------------------------------------------------------------------------------------------------------------------------------------|
|                         |                                                                        | of a multi-criteria analysis method                                                                                                         | forests or a private forest owner would prefer a management strategy with an intermediate thinning intensity and a high share of pine stands                                                                                                                                                                                                                                                                                      |
| (Lasch et al., 2007)    | 3 Level II (ICP Forest) plots in Brandenburg, Lower Saxony and Bavaria | Application of climate scenarios with temperature increase and varying precipitation changes to analyse carbon budget of the forest stands. | Model simulated an increase in carbon stock of stem biomass, deadwood and soil.                                                                                                                                                                                                                                                                                                                                                   |
| (Meiwes et al., 2007)   | 21 Level II plots in Bavaria, Brandenburg and Lower Saxony (Germany)   | Modeling of the carbon budgets                                                                                                              | Models are suitable instruments for the analysis of the observation data from the monitoring plots. The combination of monitoring and modelling allows the evaluation of effects of climate change and forest management.                                                                                                                                                                                                         |
| (Seidl et al., 2008)    | Forest management unit in Carinthia, southern Austria                  | Application of different management strategies under current climate and transient climate change and comparison with the model PICUS       | <ul style="list-style-type: none"> <li>– A transition to continuous cover forestry increased C storage in all climate scenarios compared to the approximately balanced C budget under the age class system.</li> <li>– With regard to climate change impacts both models agreed on distinct effects on productivity but lower sensitivity of C stocks due to compensation from respiration and adaptive harvest levels</li> </ul> |
| (Wechsung et al., 2009) | Agricultural land in the 5 Federal states of                           | Model based yield estimation of aspen short rotation coppice (SRC) under                                                                    | Yields of fast growing aspen in SRC are expected to increase under the presumed                                                                                                                                                                                                                                                                                                                                                   |

| Publication           | Region                                                    | Analysis                                                                                                                                                                                                                        | Results                                                                                                                                                                                                                                                                             |
|-----------------------|-----------------------------------------------------------|---------------------------------------------------------------------------------------------------------------------------------------------------------------------------------------------------------------------------------|-------------------------------------------------------------------------------------------------------------------------------------------------------------------------------------------------------------------------------------------------------------------------------------|
|                       | East Germany                                              | climate change                                                                                                                                                                                                                  | changes of climate also on sandy soils with low water holding capacity even when neglecting the beneficial effect of higher CO <sub>2</sub> .                                                                                                                                       |
| (Kint et al., 2009)   | Galgenberg forest in the Netherlands                      | Investigation how conversion management of a Scots pine ( <i>Pinus sylvestris</i> L.) stand towards a mixed oak-birch stand would affect stand structural development and hence biodiversity and productivity in the long term. | The optimal conversion regime – in which both stand productivity and biodiversity objectives can be combined – implies thinning from above, pine tree retention, and cutting cycles of 6 years.                                                                                     |
| (Kollas et al., 2009) | Agricultural land in Germany                              | Exploration the actual and future energy potential of short-rotation cop scenarios.                                                                                                                                             | <ul style="list-style-type: none"> <li>– If 4 m ha were used as SRC, between 415 and 522 PJ a-1 of primary energy could be produced in the scenario periods (2041-2060).</li> <li>– SRC can deliver a substantial contribution to the primary energy production in 2060.</li> </ul> |
| (Lasch et al., 2009)  | Mixed Scots pine-oak stands in Brandenburg (Germany)      | Analysis of carbon and water budget with various management strategies and under climate change; comparison with the model BWINPro                                                                                              | 4C allows the analysis of various ecosystem functions and the evaluation of management strategies regarding these functions.                                                                                                                                                        |
| (Lasch et al., 2010)  | Agricultural land in the 5 Federal states of East Germany | Estimation of the potential woody biomass yield of SRC plantations with aspen on suitable land in Eastern Germany under climate change and evaluation how aspen SRC plantation affects groundwater recharge and the             | Aspen SRC plantations are a suitable contribution to regional CO <sub>2</sub> mitigation and carbon sequestration under possible change of climate, but that negative impacts on the regional water budget are                                                                      |

| Publication              | Region                                                            | Analysis                                                                                                                                        | Results                                                                                                                                                                                                                                                                                                                      |
|--------------------------|-------------------------------------------------------------------|-------------------------------------------------------------------------------------------------------------------------------------------------|------------------------------------------------------------------------------------------------------------------------------------------------------------------------------------------------------------------------------------------------------------------------------------------------------------------------------|
|                          |                                                                   | impacts of land use change on the soil properties.                                                                                              | possible.                                                                                                                                                                                                                                                                                                                    |
| (Reyer et al., 2010)     | Mixed Douglas fir- beech stands in Germany and in the Netherlands | Climate change effects on the inter-specific competition in a managed Douglas-fir/beech mixed forest.                                           | Simulated climate change does not substantially alter the interaction of the two species. The concept of complementary water use highlights the importance of mixed forest for climate change adaptation.                                                                                                                    |
| (Gutsch et al., 2011)    | Mixed oak-pine stand in Brandenburg/ Germany                      | Analysis of different management scenarios under climate change                                                                                 | <ul style="list-style-type: none"> <li>– The analysis of variance in the growth related model outputs showed an increase of climate related uncertainty of forest growth with increasing climate warming.</li> <li>– The increase of climate induced uncertainty is much higher from 2 to 3 K than from 0 to 2 K.</li> </ul> |
| (Borys et al., 2013)     | Four beech forests of a management unit in Thuringia              | Analysis of carbon budget of the long-term experimental stands using a wood product model                                                       | <ul style="list-style-type: none"> <li>– The impact of management on the carbon budgets is more determining than the impact of the selected climate scenarios.</li> <li>– The unmanaged experimental site under the 3K-scenario stores the highest amount of total carbon.</li> </ul>                                        |
| (van Oijen et al., 2013) | Twelve sites, from Austria, Belgium, Estonia and Finland.         | Evaluation how Bayesian calibration (BC), Bayesian model comparison (BMC) and Bayesian model averaging (BMA) can help to assess the uncertainty | <ul style="list-style-type: none"> <li>– BC reduced uncertainties strongly in all but the most complex model.</li> <li>– BMC using NFI- and PSP-data identified the 4C model, which is of</li> </ul>                                                                                                                         |

| Publication               | Region                                                                                            | Analysis                                                                                                                                                        | Results                                                                                                                                                                                                                                                                                                                                                           |
|---------------------------|---------------------------------------------------------------------------------------------------|-----------------------------------------------------------------------------------------------------------------------------------------------------------------|-------------------------------------------------------------------------------------------------------------------------------------------------------------------------------------------------------------------------------------------------------------------------------------------------------------------------------------------------------------------|
|                           |                                                                                                   | of model predictions.                                                                                                                                           | moderate complexity but mechanistic, as the most plausible forest model after calibration.                                                                                                                                                                                                                                                                        |
| (Stojanović et al., 2014) | Nine European beech forest sites in Serbia                                                        | Integration of stakeholder preferences, experts' opinion and forest growth modelling for climate and management scenario assessments                            | <ul style="list-style-type: none"> <li>– Forest management together with stakeholder preferences will play much bigger role in providing of better support for ecosystem service in comparison to climate conditions</li> <li>– frequent felling operations provide better result than less frequent operations for the same amount of harvested wood.</li> </ul> |
| (Reyer et al., 2014)      | 132 typical forest sites of important European tree species in ten environmental zones in Europe. | Projection of forest productivity changes under different climate change scenarios at a large number of sites in Europe with a stand-scale process-based model. | <ul style="list-style-type: none"> <li>– Future forest productivity will be affected by climate change and these effects depend strongly on the climate scenario used and the persistence of CO<sub>2</sub> effects. Productivity increases in Northern Europe, increases or decreases in Central Europe, and decreases in Southern Europe.</li> </ul>            |
| (Borys et al., 2015)      | Management unit in Thuringia (Buchfahrt)                                                          | Economic analysis of the beech stands of the considered management unit                                                                                         | <ul style="list-style-type: none"> <li>– The study shows that from an economic point of view it is often more appropriate to abandon the usual thinning management of beech stands with heavy thinning from above in favour of management fostering stronger carbon storage.</li> <li>– The increase in carbon storage in the</li> </ul>                          |

| Publication              | Region                                                                                                          | Analysis                                                                                                                             | Results                                                                                                                                                                                                                                                                                                                                                     |
|--------------------------|-----------------------------------------------------------------------------------------------------------------|--------------------------------------------------------------------------------------------------------------------------------------|-------------------------------------------------------------------------------------------------------------------------------------------------------------------------------------------------------------------------------------------------------------------------------------------------------------------------------------------------------------|
|                          |                                                                                                                 |                                                                                                                                      | forest by medium thinning from below and no management was, however, associated with additional costs or lower revenues of 112 € and 123 € per additional ton of carbon stored respectively.                                                                                                                                                                |
| (Gutsch et al., 2015a)   | Agriculture and Forestry in Germany                                                                             | Assessment of the uncertainty caused by climate change effects in the potential supply of biomass available for energy production.   | In five federal states the climate scenarios lead to decreasing yields of energy maize and winter wheat. Impacts of climate scenarios on forest yields are mainly positive and show both positive and negative effects on yields of SRC.                                                                                                                    |
| (Gutsch et al., 2015b)   | Two mono-species Scots pine stands and two mixed Scots pine-oak stands in the lowlands of northeastern Germany. | Analysis of two water uptake approaches (an empirical and a more process-based one) in Scots pine and Scots pine-Sessile oak stands. | Accurate projections of future forest productivity depend largely on the realistic representation of root water uptake in forest model simulations. Three different measured parameters (transpiration, soil water content, tree rings) did not allow a superior approach to each other.                                                                    |
| (Schelhaas et al., 2015) | Europe                                                                                                          | The data from Reyer et al. 2014 was used to scale the future productivity changes in EFISCEN.                                        | The European forest system is very inert and it takes a long time to influence the species distribution by replacing species after final felling. By 2070, on average about 36 % of the area expected to have decreased species suitability will have changed species following business as usual management. Alternative management, consisting of shorter |

| Publication               | Region                                          | Analysis                                                                                                                                                                                                                                                                                                             | Results                                                                                                                                                                                                                                                                                                                                       |
|---------------------------|-------------------------------------------------|----------------------------------------------------------------------------------------------------------------------------------------------------------------------------------------------------------------------------------------------------------------------------------------------------------------------|-----------------------------------------------------------------------------------------------------------------------------------------------------------------------------------------------------------------------------------------------------------------------------------------------------------------------------------------------|
|                           |                                                 |                                                                                                                                                                                                                                                                                                                      | rotations for those species and species planting based on expected trends, will have increased this species transition to 40 %.                                                                                                                                                                                                               |
| (Lasch-Born et al., 2015) | Forested area in Germany                        | How do changes in net primary production and timber production interact with changes in the water budget under climate change? What are the possible risks of fire danger or pest outbreaks?                                                                                                                         | The dryer (water-limited) low elevated regions reaching from southwestern to northeastern Germany will benefit less from the assumed climate change than regions in the Northwest and forest sites at higher altitudes, which are mainly temperature limited.                                                                                 |
| (Borys et al., 2016)      | Forest management unit in Thuringia (Buchfahrt) | Assessment how much carbon (C) is currently stored in a forest district and how the carbon stocks will develop up to the year 2099 with a changing climate and under various management regimes (including no management), with different assumptions about carbon dioxide (CO <sub>2</sub> ) fertilization effects. | Climate change affects carbon sequestration. The no management strategy sequestered the highest amount of carbon which was greater than the management regimes. In the model, the possible fertilization effect of CO <sub>2</sub> is an important factor. However, forest management remains the determining factor in this forest district. |
| (Gutsch et al., 2016)     | Forest area Germany                             | This study aims to derive simple models from 4C simulations with low data requirements which allow calculation of NPP and analysis of climate impacts using many climate scenarios at a large amount of sites.                                                                                                       | The fitted regression functions showed a reasonable fit to measured NPP datasets. Temperature increase of up to 3 K leads to positive effects on NPP. In water-limited regions, this positive effect is dependent on the length of drought periods.                                                                                           |

| Publication             | Region                                                                     | Analysis                                                                                                                                                                                                                                                                                                                             | Results                                                                                                                                                                                                                                                                                                                                                                                                     |
|-------------------------|----------------------------------------------------------------------------|--------------------------------------------------------------------------------------------------------------------------------------------------------------------------------------------------------------------------------------------------------------------------------------------------------------------------------------|-------------------------------------------------------------------------------------------------------------------------------------------------------------------------------------------------------------------------------------------------------------------------------------------------------------------------------------------------------------------------------------------------------------|
| (Reyer et al., 2016)    | Two NFI sites each from Austria, Belgium, Estonia and Finland              | This paper aims to integrate parameter uncertainty into simulations of climate change impacts on forest net primary productivity (NPP). Application of either prior (uncalibrated) or posterior (calibrated using Bayesian calibration) parameter variations to express parameter uncertainty.                                       | If a key objective in climate change impact research is to quantify uncertainty, parameter uncertainty as a major factor driving the degree of uncertainty of projections should be included.                                                                                                                                                                                                               |
| (Suckow et al., 2016)   | Scots pine stand Zotino (Siberia, Russia)                                  | Analysis of impacts of climate change on a pine forest stand in Central Siberia to assess benefits and risks for such forests in the future.                                                                                                                                                                                         | The analysis confirms increasing productivity of the boreal pine stand but also highlights increasing drought stress and risks from abiotic disturbances which could cancel out productivity gains.                                                                                                                                                                                                         |
| (Horemans et al., 2017) | FLUXNET sites: Soroe (Denmark), Vielsalm (Belgium) and Collelongo (Italy). | The performance of two global dynamic vegetation models, i.e. CARAIB and ISBACC, and one stand-scale forest model, i.e. 4C, was compared to long-term observed net ecosystem carbon exchange (NEE) time series from eddy covariance monitoring stations at three old-grown European beech ( <i>Fagus sylvatica</i> L.) forest stands | <ul style="list-style-type: none"> <li>– The most important errors for all three models occurred at the edges of the observed NEE distribution and the model errors were correlated with environmental variables on a daily scale</li> <li>– Models should be evaluated across multiple sites, preferably using multiple evaluation methods, to identify processes that request reconsideration.</li> </ul> |
| (Gutsch et al., 2018)   | Germany's forests, NFI data (BWI <sup>3</sup> )                            | Quantification of the effects of two alternative management scenarios and climate impacts on forest variables indicative of ecosystem services related to                                                                                                                                                                            | <ul style="list-style-type: none"> <li>– Northeastern and western forest regions are more suitable to provide timber (while minimizing the negative impacts on remaining</li> </ul>                                                                                                                                                                                                                         |



| Publication               | Region                                 | Analysis                                                                                                                                                                                                                                                                | Results                                                                                                                                                                                                                                                                                                                                                                                  |
|---------------------------|----------------------------------------|-------------------------------------------------------------------------------------------------------------------------------------------------------------------------------------------------------------------------------------------------------------------------|------------------------------------------------------------------------------------------------------------------------------------------------------------------------------------------------------------------------------------------------------------------------------------------------------------------------------------------------------------------------------------------|
|                           |                                        | timber, habitat, water, and carbon.                                                                                                                                                                                                                                     | <p>ecosystem services) whereas southern and central forest regions are more suitable to fulfil ‘habitat’ and ‘carbon’ services.</p> <ul style="list-style-type: none"> <li>– The results provide the base for future forest management optimizations at the regional scale in order to maximize ecosystem services and forest ecosystem sustainability at the national scale.</li> </ul> |
| (Kollas et al., 2018)     | Scots pine stand in Berlin (Germany)   | Estimation of mistletoe-induced losses in timber yield applying the process-based forest growth model 4C.                                                                                                                                                               | Simulations showed that the amended forest growth model 4C depicts well the BAI growth pattern during >100 years and also quantifies well the mistletoe-induced growth reductions in Scots pine stands.                                                                                                                                                                                  |
| (Yousefpour et al., 2018) | Forest stands in 18 European countries | Simulation of European commercial forests’ growth conditions and coupled it with an optimization algorithm to simulate the implementation of Climate Smart Forestry for 18 European countries encompassing 68.3 million ha of forest (42.4% of total EU-28 forest area) | A European Climate Smart Forestry (CSF) policy could sequester 7.3–11.1 billion tons of carbon, projected to be worth 103 to 141 billion euros in the 21st century. An efficient CSF policy would allocate carbon sequestration to European countries with a lower wood price, lower labour costs, high harvest costs, or a mixture thereof to increase its economic efficiency.         |
| (Lasch-Born et al., 2018) | Germany’s forests                      | Ongoing climate change affects growth and increases biotic and abiotic threats to                                                                                                                                                                                       | All indicators showed higher risks for the scenario time period compared to the                                                                                                                                                                                                                                                                                                          |

| Publication            | Region                                | Analysis                                                                                                                                                          | Results                                                                                                                                                                                                                                                                                                                                                                                                                                                              |
|------------------------|---------------------------------------|-------------------------------------------------------------------------------------------------------------------------------------------------------------------|----------------------------------------------------------------------------------------------------------------------------------------------------------------------------------------------------------------------------------------------------------------------------------------------------------------------------------------------------------------------------------------------------------------------------------------------------------------------|
|                        |                                       | Germany's forests. How do these risks develop through the mid-century under a variety of climate change scenarios using 4C?                                       | recent time period, except the late frost risk indicators, if averaged over all climate scenarios. The late frost risk for beech and oaks decreased for the main forest sites.                                                                                                                                                                                                                                                                                       |
| (Bugmann et al., 2019) | Scots pine stand Peitz (Germany) (4C) | Evaluation 15 dynamic vegetation models (DVMs) regarding their sensitivity to different formulations of tree mortality under different degrees of climate change. | (1) Mortality is one of the most uncertain processes when it comes to assessing forest response to climate change, and (2) more data and a better process understanding of tree mortality are needed to improve the robustness of simulated future forest dynamics. Our study highlights that comparing several alternative mortality formulations in DVMs provides valuable insights into the effects of process uncertainties on simulated future forest dynamics. |

### 3 S2 FOREST GROWTH

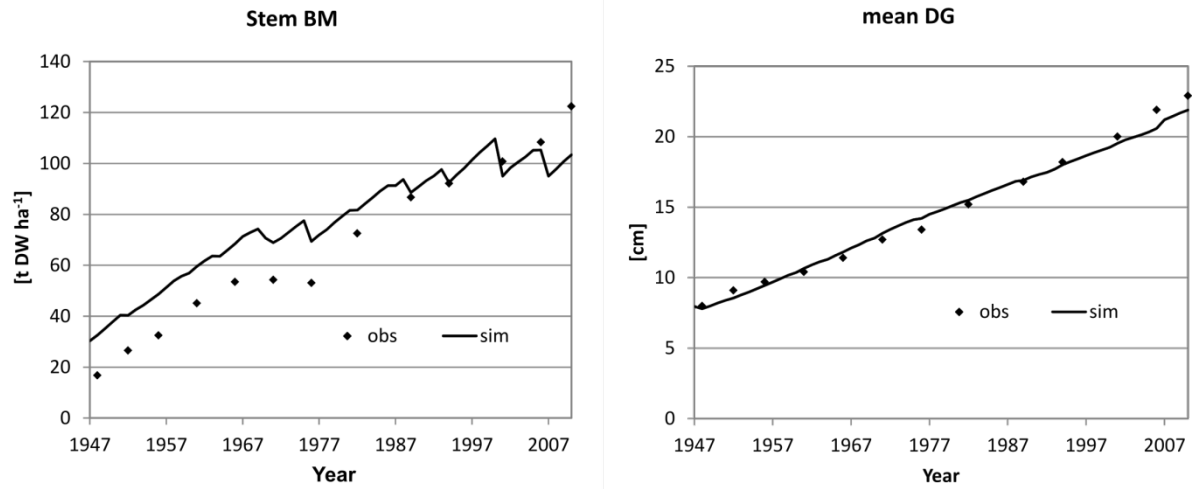

4

5 **Figure S1 Simulated (sim) and observed (obs) DG and stem biomass BM for Peitz. The plots show**  
 6 **the time series.**

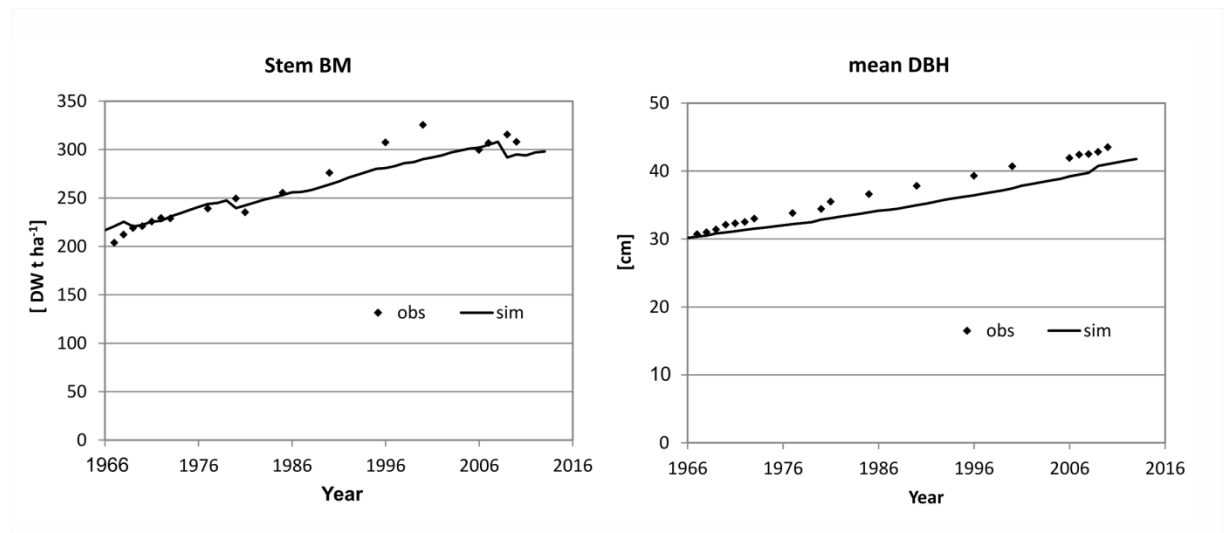

7

8 **Figure S2 Simulated (sim) and observed (obs) DBH and stem biomass BM for Solling. The plots**  
 9 **show the time series.**

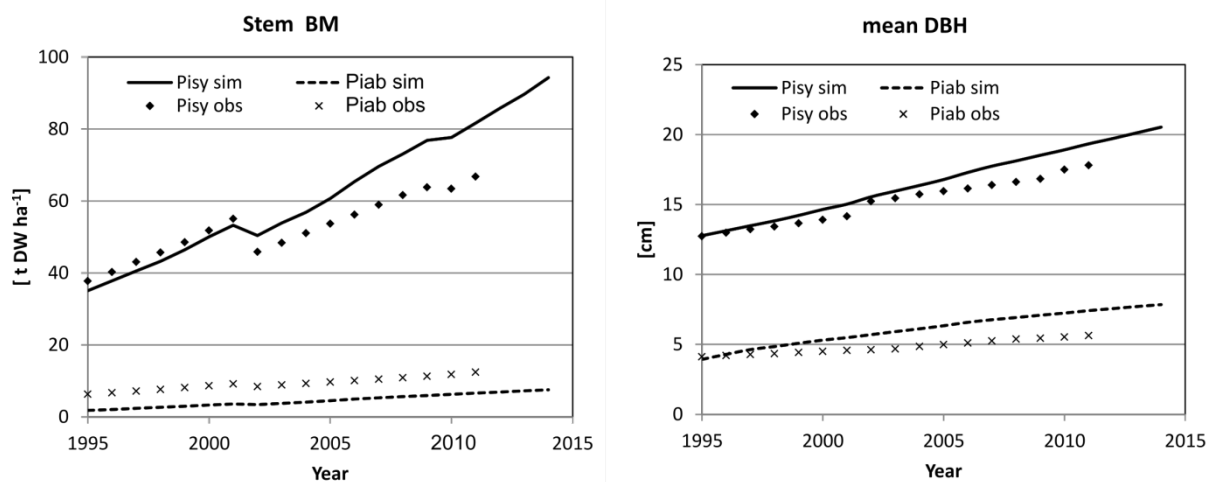

10  
 11 **Figure S3 Simulated (sim ) and observed (obs) DBH and stem biomass BM for Hyytiälä (Pisy – pine,**  
 12 **Piab – spruce). The plots show the time series.**

## 13 S3 FLUXES

### 14 S3.1 Sorø

#### 15 S3.1.1 Graphical analysis daily data Sorø

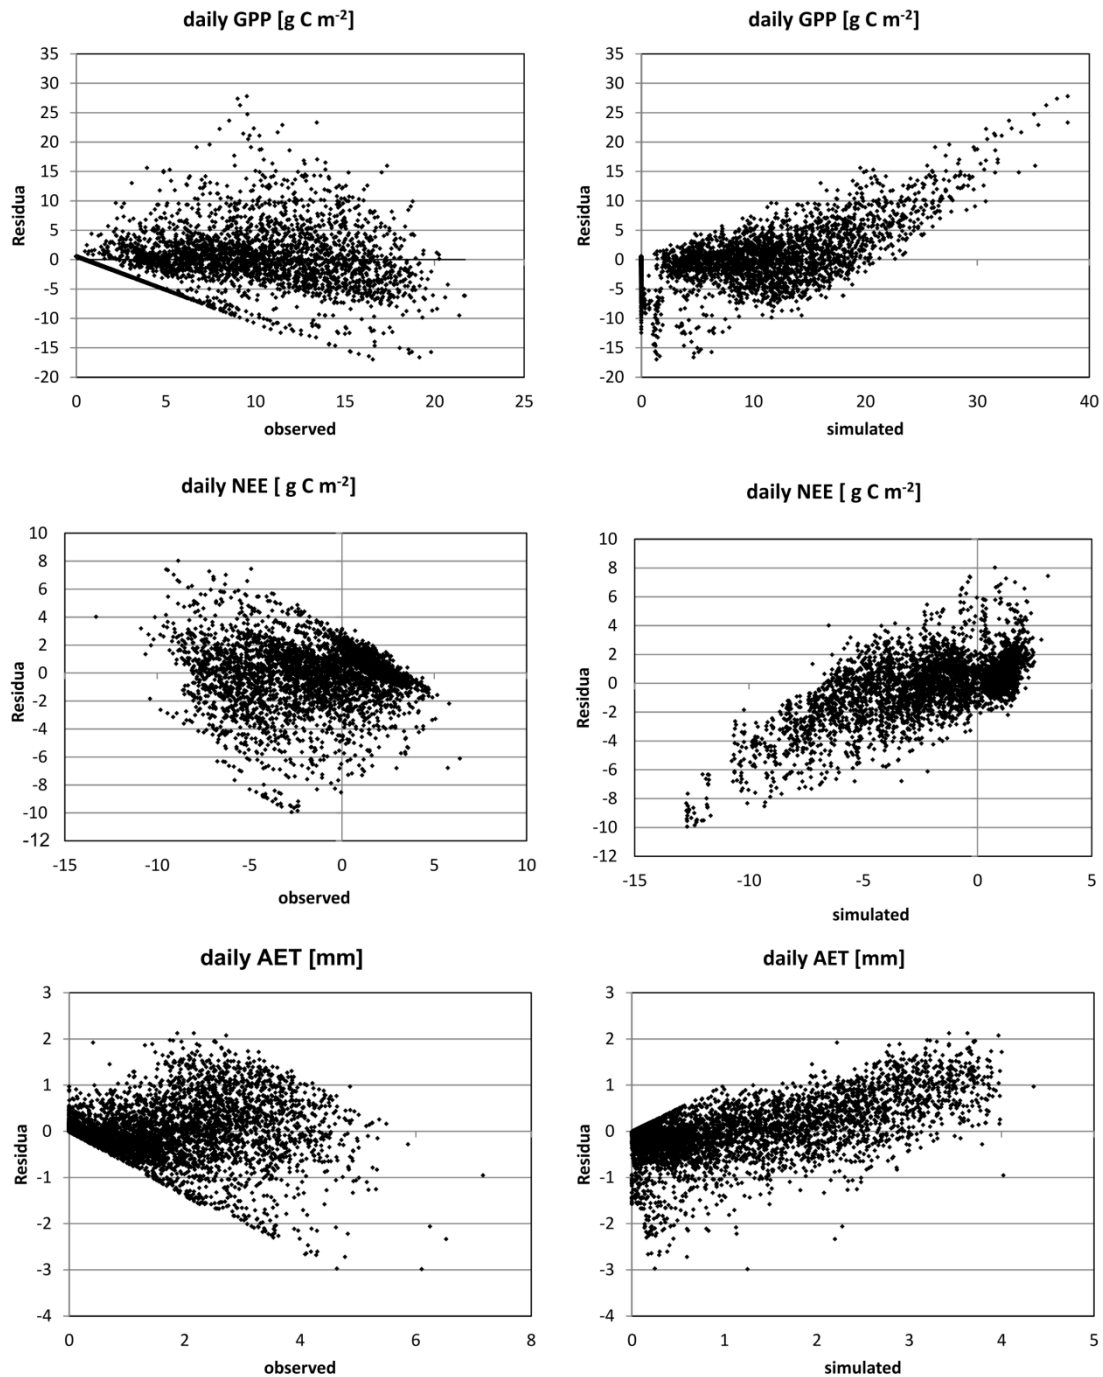

16

17 Figure S4 Residual plots of GPP, NEE and AET for Sorø; 1996-2012

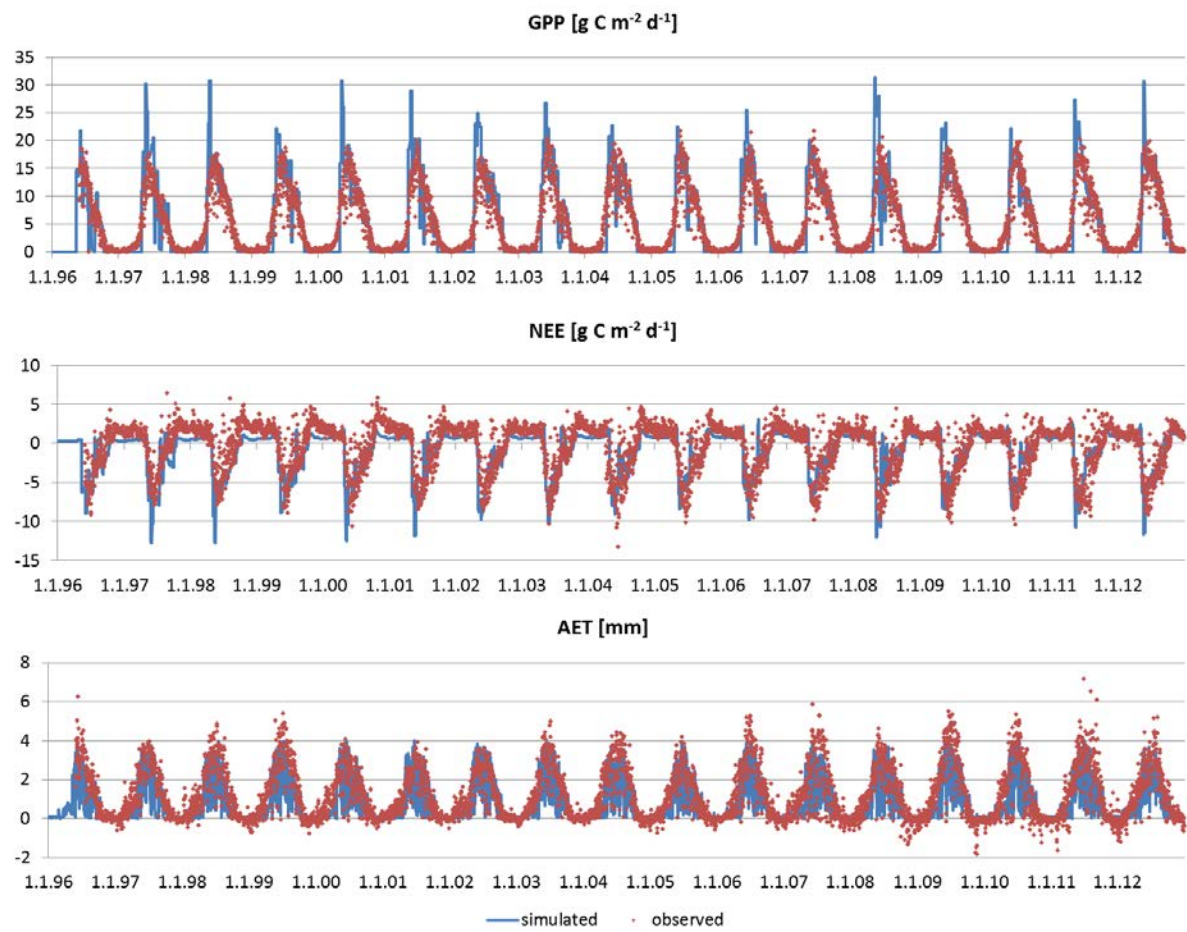

Figure S5 Time series of GPP, NEE, and AET for Sorø; 1996-2012

21 S3.1.2 Graphical analysis monthly data Sorø

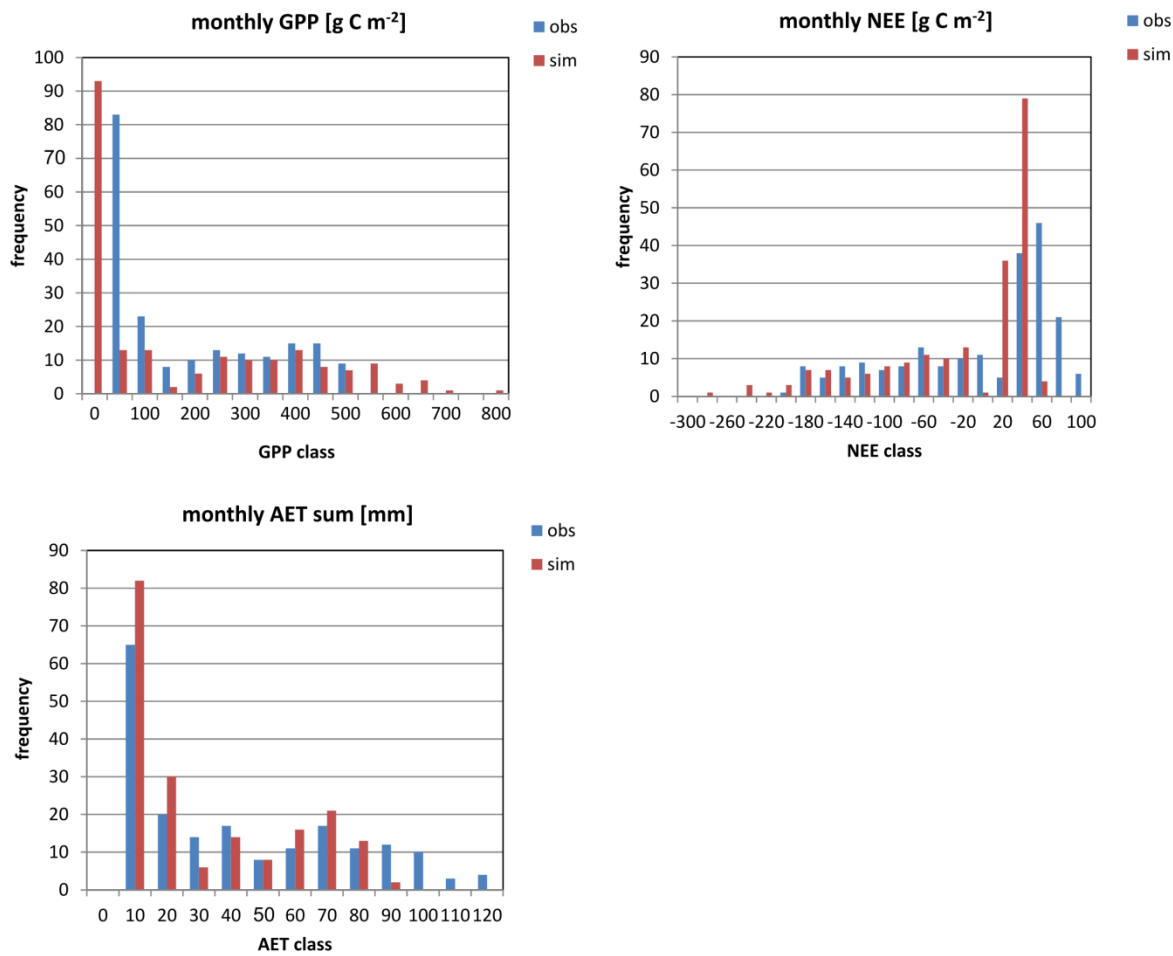

22

23 **Figure S6** Frequency plots of monthly data of GPP, NEE and AET for Sorø; 1996-2012

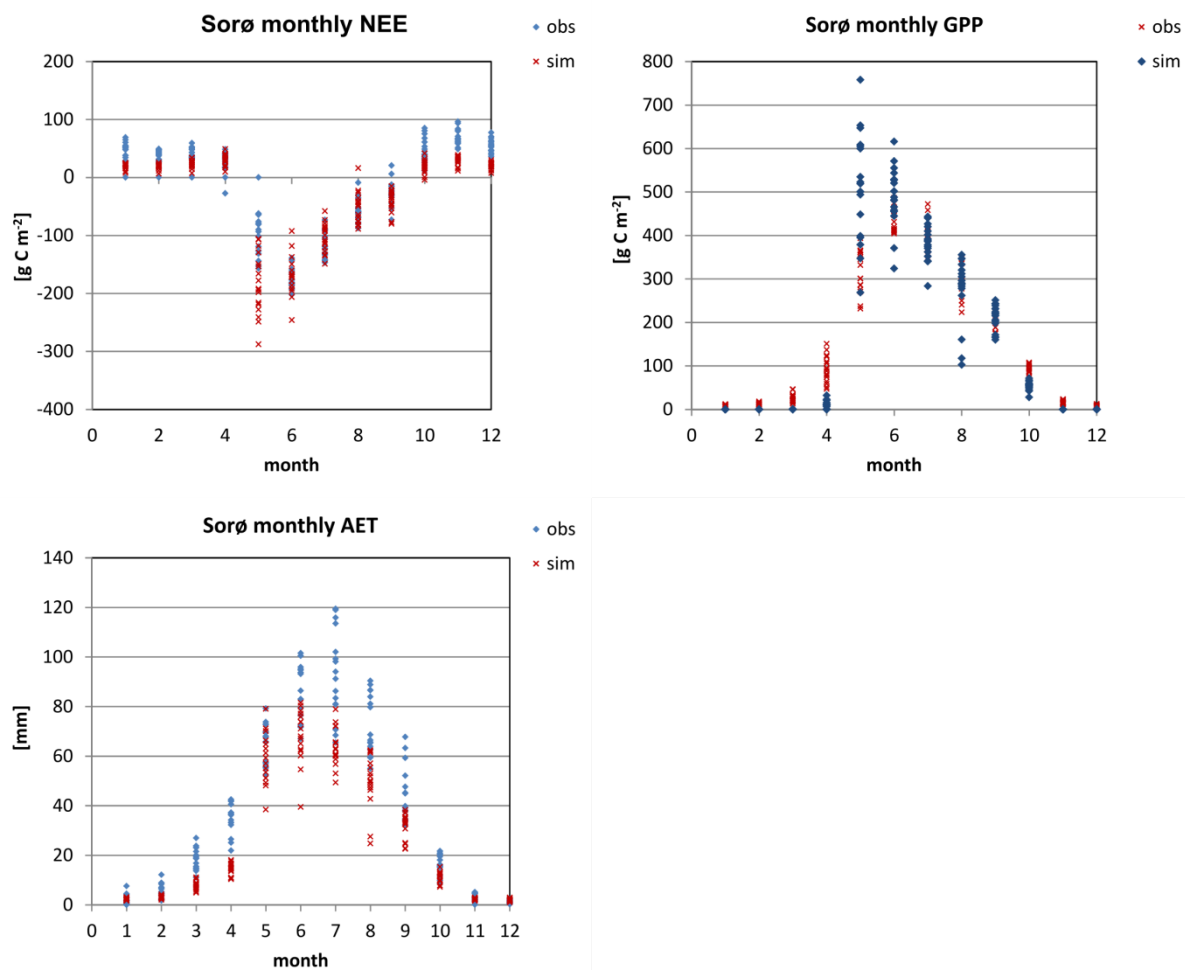

24

25 **Figure S7 Seasonal cycle of monthly GPP, NEE and AET values (obs - observed, sim - simulated) in**  
 26 **Sorø**



## 27 S3.2 Hyytiälä

### 28 S3.2.1 Graphical analysis daily data Hyytiälä

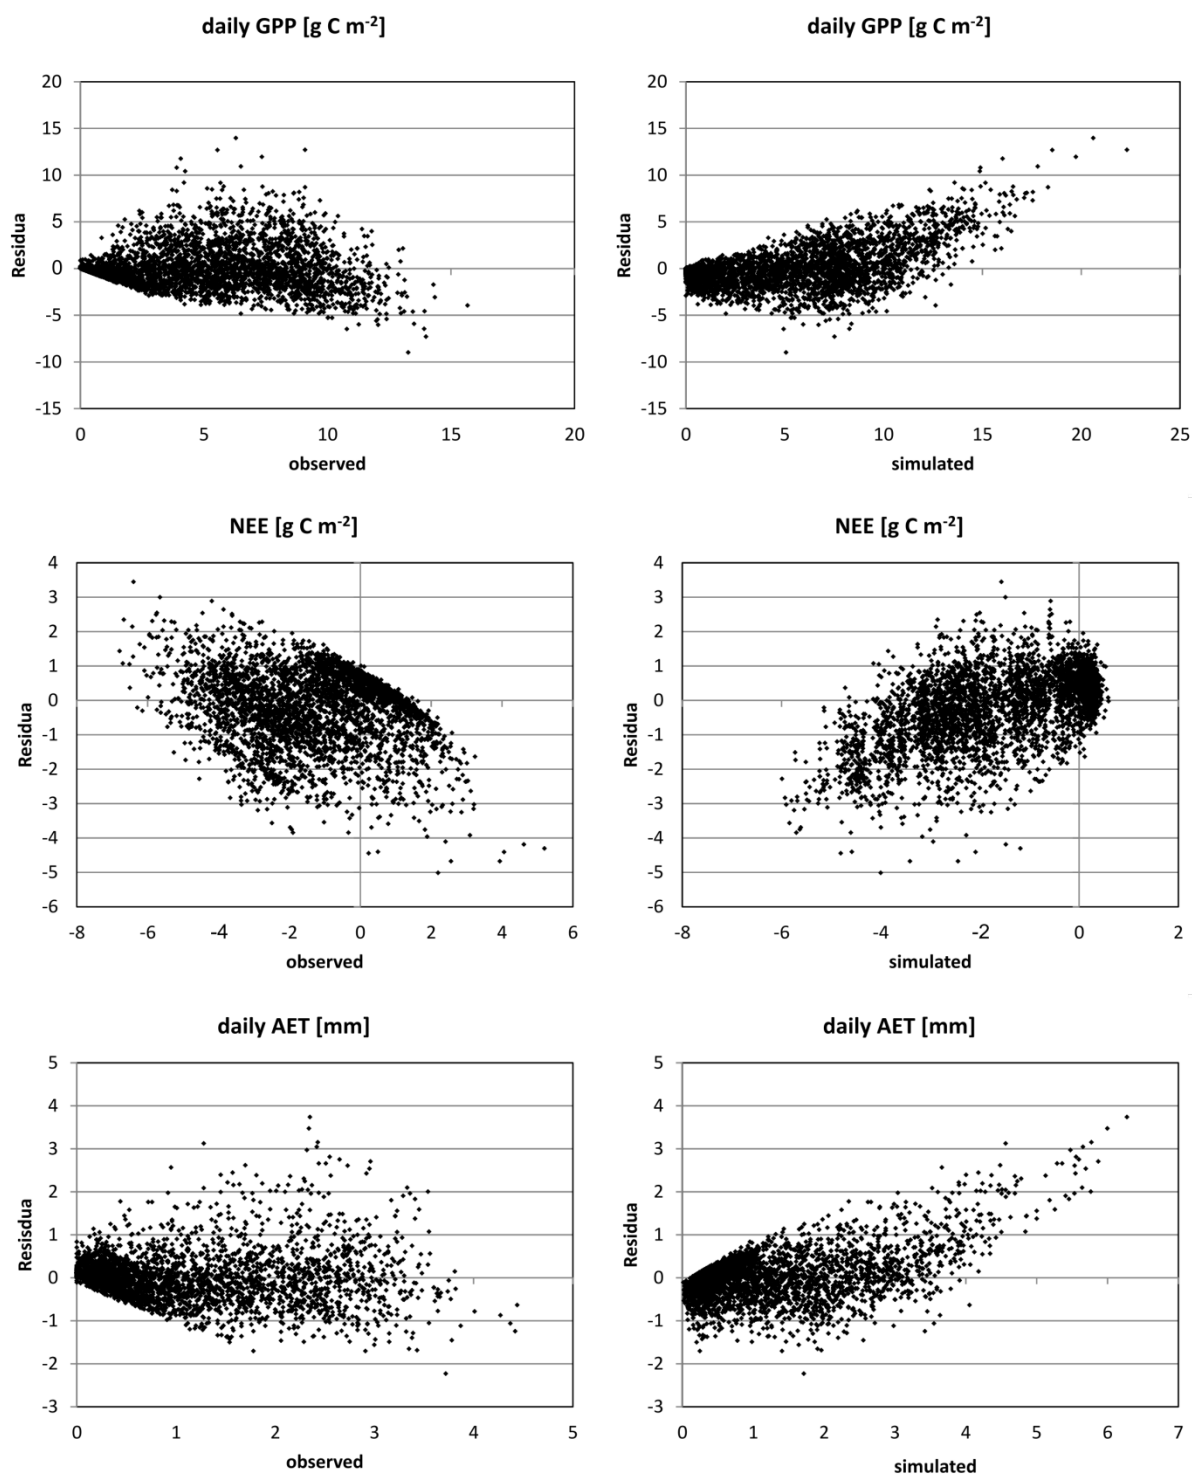

29

30 Figure S8 Residual plots of GPP, NEE and AET for Hyytiälä; 1996-2014

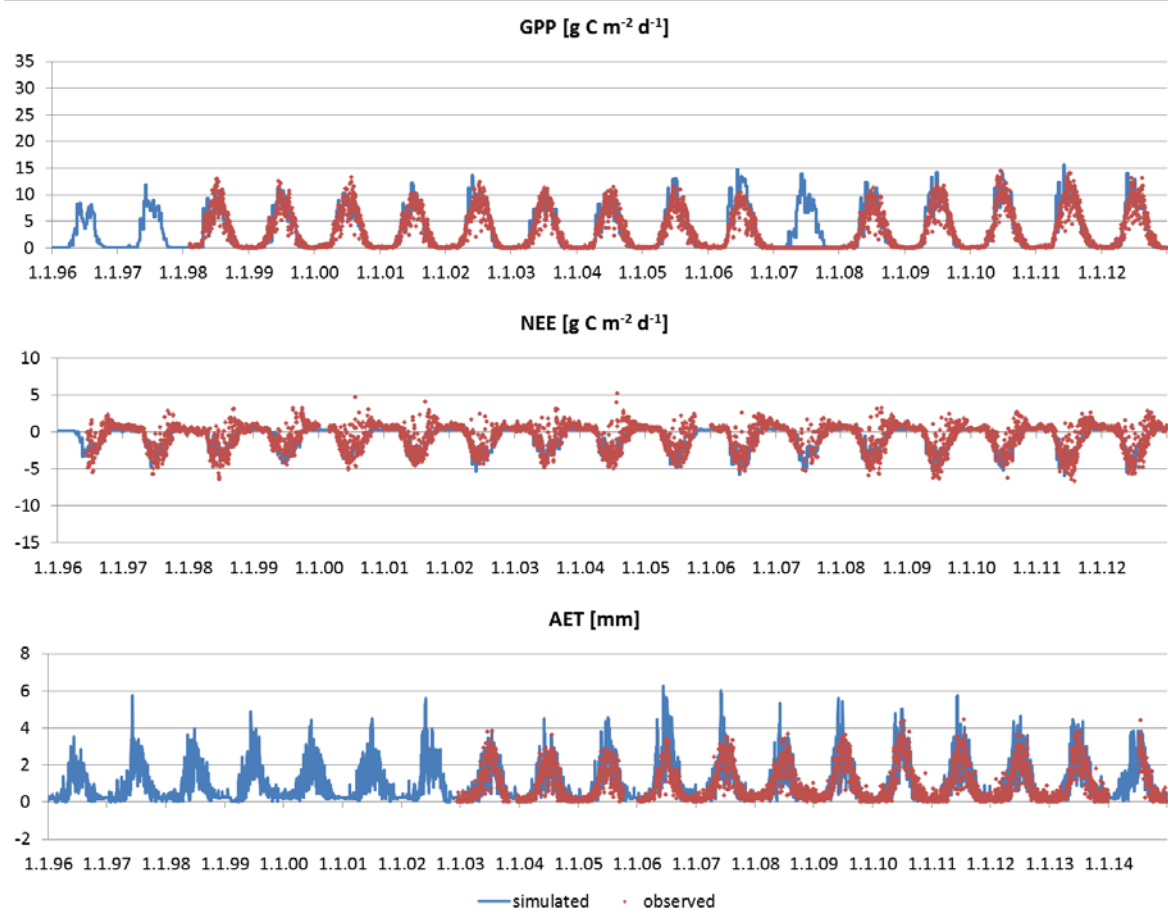

**Figure S9 Time series of GPP, NEE, and AET for Hyytiälä; 1996-2014**

S3.2.2 Graphical analysis monthly data Hyytiälä

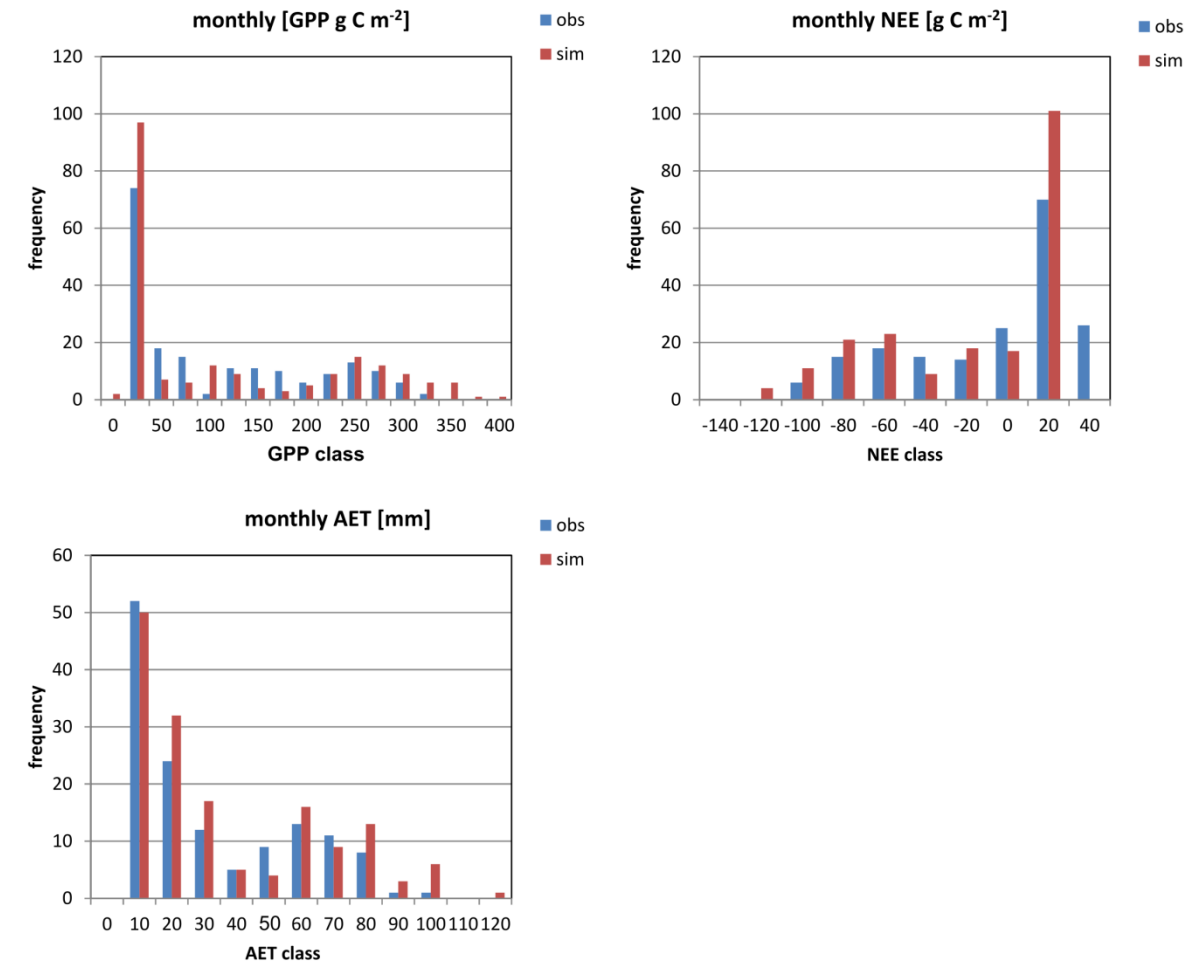

Figure S10 Frequency plots of monthly GPP, NEE, and AET for Hyytiälä; 1996-2014

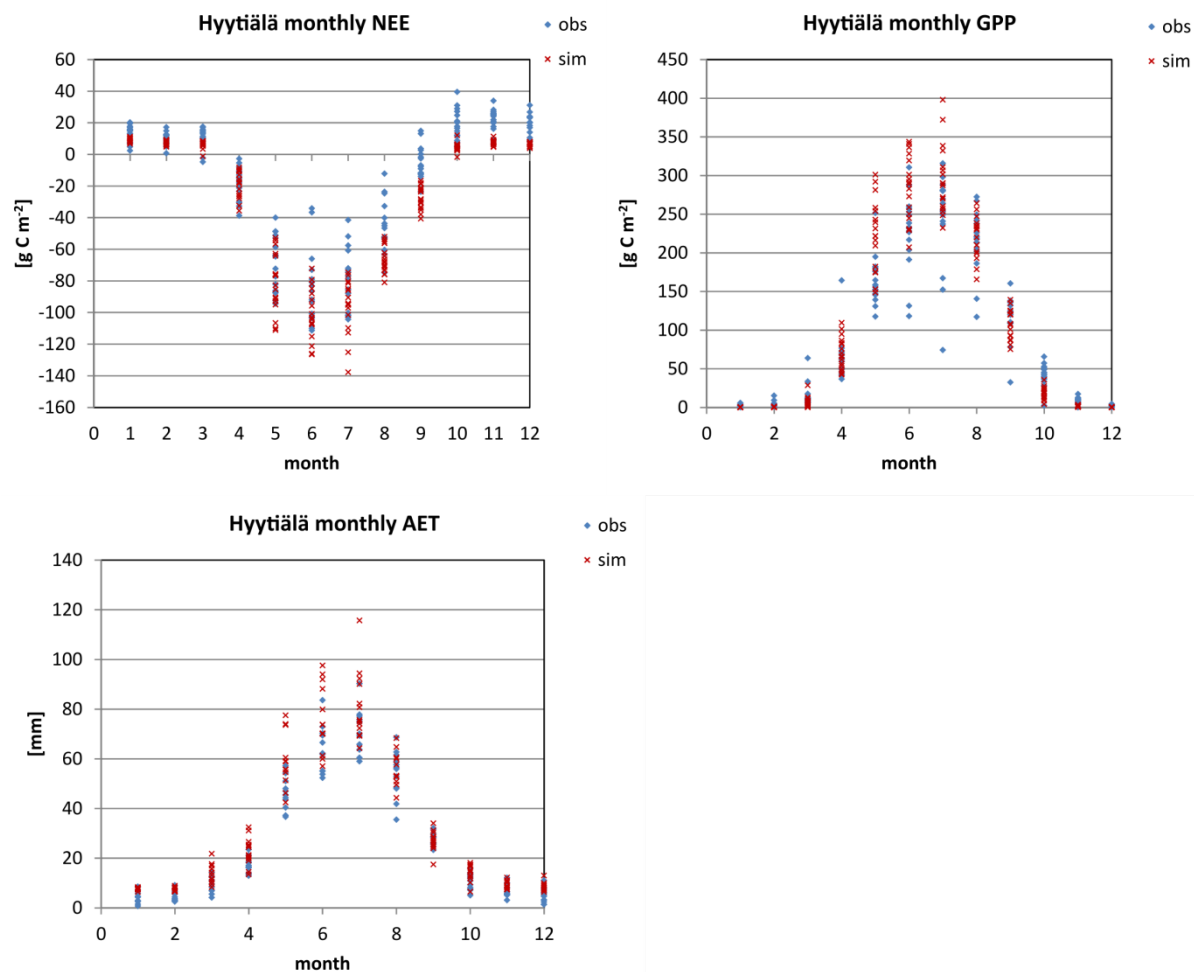

Figure S11 Seasonal cycle of monthly GPP, NEE and AET values (obs - observed, sim - simulated) in Hyytiälä

42 **S4 ADDITIONAL DATA**43 **Table S2 Characteristics of the soil profiles of Peitz, Solling, Hyytiälä, and Sorø**

|                | Soil layers         |                     |       |                 |       |               |             |                          |               |                                       |      |       |                      |
|----------------|---------------------|---------------------|-------|-----------------|-------|---------------|-------------|--------------------------|---------------|---------------------------------------|------|-------|----------------------|
|                | Upper depth<br>[cm] | Lower depth<br>[cm] | Clay  | Silt<br>[mass%] | Sand  | Stone content | Pore volume | Field capacity<br>[vol%] | Wilting point | Bulk density<br>[g cm <sup>-3</sup> ] | pH   | C/N   | C-content<br>[mass%] |
| <b>Peitz</b>   | 6.0                 | 0.0                 | 0.00  | 0.00            | 0.00  | 0.00          | 81.52       | 30.00                    | 12.00         | 0.26                                  | 2.89 | 22.60 | 42.25                |
|                | 0.0                 | 5.0                 | 7.00  | 6.00            | 87.00 | 0.00          | 44.00       | 26.00                    | 7.50          | 1.12                                  | 2.88 | 33.57 | 2.60                 |
|                | 5.0                 | 10.0                | 7.00  | 6.00            | 87.00 | 0.00          | 44.00       | 26.00                    | 7.50          | 1.39                                  | 3.33 | 46.39 | 0.90                 |
|                | 10.0                | 20.0                | 7.00  | 2.00            | 91.00 | 0.00          | 44.00       | 26.00                    | 7.50          | 1.30                                  | 3.72 | 41.95 | 0.78                 |
|                | 20.0                | 30.0                | 7.00  | 2.00            | 91.00 | 0.00          | 44.00       | 26.00                    | 7.50          | 1.40                                  | 4.10 | 44.45 | 0.45                 |
|                | 30.0                | 40.0                | 7.00  | 2.00            | 91.00 | 0.00          | 44.00       | 26.00                    | 7.50          | 1.37                                  | 4.16 | 58.47 | 0.18                 |
|                | 40.0                | 60.0                | 7.00  | 2.00            | 91.00 | 0.00          | 44.00       | 26.00                    | 7.50          | 1.60                                  | 4.20 | 23.33 | 0.07                 |
|                | 60.0                | 130.0               | 0.70  | 1.30            | 98.00 | 0.00          | 52.00       | 25.00                    | 9.00          | 1.60                                  | 4.20 | 25.00 | 0.05                 |
|                | 130.0               | 200.0               | 3.00  | 1.00            | 96.00 | 0.00          | 52.00       | 25.00                    | 9.00          | 1.60                                  | 4.20 | 0.00  | 0.00                 |
| <b>Solling</b> | 5.8                 | 0.0                 | 0.00  | 0.00            | 0.00  | 0.00          | 89.80       | 34.00                    | 7.00          | 0.14                                  | 2.88 | 25.52 | 49.69                |
|                | 0.0                 | 5.0                 | 19.67 | 71.07           | 9.27  | 0.83          | 60.99       | 47.94                    | 13.74         | 0.82                                  | 2.83 | 18.57 | 5.29                 |
|                | 5.0                 | 10.0                | 19.67 | 71.07           | 9.27  | 5.00          | 60.99       | 47.94                    | 13.74         | 1.02                                  | 3.21 | 17.39 | 2.94                 |
|                | 10.0                | 20.0                | 19.67 | 71.07           | 9.27  | 4.67          | 60.99       | 47.94                    | 13.74         | 1.05                                  | 3.69 | 16.18 | 2.06                 |
|                | 20.0                | 40.0                | 19.50 | 71.20           | 9.30  | 3.83          | 59.20       | 48.93                    | 13.72         | 1.11                                  | 4.11 | 13.01 | 1.22                 |
|                | 40.0                | 80.0                | 23.80 | 61.13           | 15.07 | 20.00         | 40.61       | 35.58                    | 18.88         | 1.37                                  | 3.99 | 6.69  | 0.31                 |

|          | Soil layers         |             |       |                 |       |               |             |                          |               |                                       |      |       |                      |
|----------|---------------------|-------------|-------|-----------------|-------|---------------|-------------|--------------------------|---------------|---------------------------------------|------|-------|----------------------|
|          | Upper depth<br>[cm] | Lower depth | Clay  | Silt<br>[mass%] | Sand  | Stone content | Pore volume | Field capacity<br>[vol%] | Wilting point | Bulk density<br>[g cm <sup>-3</sup> ] | pH   | C/N   | C-content<br>[mass%] |
|          | 80.0                | 100.0       | 31.80 | 46.60           | 21.60 | 23.00         | 37.32       | 36.40                    | 24.48         | 1.56                                  | 3.84 | 2.73  | 0.10                 |
|          | 100.0               | 150.0       | 31.80 | 46.60           | 21.60 | 96.00         | 35.50       | 30.60                    | 26.50         | 2.10                                  | 4.50 | 0.00  | 0.00                 |
| Hyytiälä | 6.0                 | 0.0         | 0.00  | 0.00            | 0.00  | 0.00          | 85.71       | 70.00                    | 12.00         | 0.20                                  | 3.25 | 28.60 | 36.95                |
|          | 0.0                 | 5.5         | 6.34  | 14.18           | 79.48 | 26.17         | 48.93       | 30.38                    | 8.52          | 0.74                                  | 3.41 | 33.49 | 3.89                 |
|          | 5.5                 | 22.5        | 5.72  | 12.90           | 81.38 | 28.65         | 50.77       | 28.33                    | 11.61         | 0.73                                  | 4.30 | 26.28 | 2.71                 |
|          | 22.5                | 56.0        | 6.77  | 15.02           | 78.21 | 29.64         | 37.84       | 29.07                    | 10.06         | 1.27                                  | 4.35 | 46.50 | 0.37                 |
|          | 56.0                | 89.0        | 7.88  | 10.89           | 81.23 | 43.50         | 28.26       | 22.21                    | 12.09         | 1.45                                  | 4.54 | 27.60 | 0.14                 |
|          | 89.0                | 10.0        | 7.88  | 10.89           | 81.23 | 43.50         | 28.00       | 22.00                    | 10.00         | 1.50                                  | 4.60 | 0.00  | 0.00                 |
|          |                     |             |       |                 |       |               |             |                          |               |                                       |      |       |                      |
| Sorø     | 6.0                 | 0.0         | 0.00  | 0.00            | 0.00  | 0.00          | 92.86       | 26.40                    | 13.10         | 0.10                                  | 4.66 | 15.86 | 12.70                |
|          | 0.0                 | 11.0        | 10.10 | 31.00           | 58.90 | 0.00          | 42.00       | 18.90                    | 8.70          | 1.29                                  | 3.33 | 14.62 | 3.23                 |
|          | 11.0                | 33.0        | 12.70 | 27.40           | 59.90 | 0.00          | 42.00       | 15.40                    | 6.40          | 1.61                                  | 3.92 | 14.51 | 0.74                 |
|          | 33.0                | 50.0        | 24.40 | 18.30           | 57.30 | 0.00          | 43.00       | 24.20                    | 14.80         | 1.45                                  | 5.13 | 9.44  | 0.68                 |
|          | 50.0                | 77.0        | 13.90 | 15.10           | 71.00 | 0.00          | 42.00       | 19.00                    | 9.10          | 1.46                                  | 7.04 | 25.37 | 1.04                 |
|          | 77.0                | 100.0       | 13.90 | 15.10           | 71.00 | 0.00          | 42.00       | 19.00                    | 9.10          | 1.88                                  | 1.32 | 25.00 | 1.21                 |
|          | 100.0               | 150.0       | 13.90 | 15.10           | 71.00 | 0.00          | 42.00       | 19.00                    | 9.10          | 1.88                                  | 1.32 | 0.00  | 0.00                 |

45 **Table S3 Available time series of observed data, partially with gaps**

| Observed data                        | Peitz     | Solling   | Hyytiälä  | Sorø      |
|--------------------------------------|-----------|-----------|-----------|-----------|
| <b>Annual data</b>                   |           |           |           |           |
| Medium height of dominant trees (HO) | 1966-2010 | -         | -         | -         |
| Mean height of all trees (MH)        | -         | 1967-2010 | 1995-2011 |           |
| Diameter at breast height (DBH)      |           | 1967-2010 | 1995-2011 | -         |
| Geometric mean diameter (DG)         | 1966-2010 | -         | -         | -         |
| Stem biomass (STBIOM)                | -         | 1967-2010 | 1995-2011 | -         |
| Stem volume (STVOL)                  | 1966-2010 | -         | -         | -         |
| Number of trees                      | 1966-2010 | 1967-2010 | 1995-2011 | -         |
| Net ecosystem production (NEP)       | -         | -         | 1995-2014 | 1997-2012 |
| Gross primary productivity (GPP)     | -         | -         | 1995-2014 | 1997-2012 |
| Actual evapotranspiration (AET)      | -         | -         | 1995-2013 | 1997-2012 |
| <b>Daily data</b>                    |           |           |           |           |
| Net ecosystem exchange (NEE)         | -         |           | 1996-2014 | 1996-2012 |
| Total ecosystem respiration (TER)    | -         |           | 1998-2014 | 1996-2012 |
| Gross primary productivity (GPP)     | -         |           | 1998-2014 | 1996-2012 |
| Actual evapotranspiration (AET)      | -         |           | 2003-2014 | 1996-2012 |
| Soil temperature organic layer       | -         |           | 1996-2014 | -         |
| Soil temperature 2 cm                | -         |           | -         | 1996-2012 |
| Soil temperature 5 cm (0 – 10 cm)    | -         |           | 1996-2014 | 1996-2012 |
| Soil temperature 18 cm (10 – 25 cm)  | -         |           | 1997-2014 | -         |
| Soil temperature 50 cm (40 – 60 cm)  | -         |           | 1997-2014 | -         |

| Observed data                    | Peitz | Solling | Hyytiälä  | Sorø      |
|----------------------------------|-------|---------|-----------|-----------|
| Water content organic layer      | -     |         | 1997-2014 | -         |
| Water content 5 cm (0 – 10 cm)   | -     |         | 1997-2014 | -         |
| Water content 8 cm (0-16 cm)     | -     |         | -         | 1996-2012 |
| Water content 18 cm (10 – 25 cm) | -     |         | 1997-2014 | -         |
| Water content 50 cm (40 – 60 cm) | -     |         | 1997-2014 | -         |

46

47



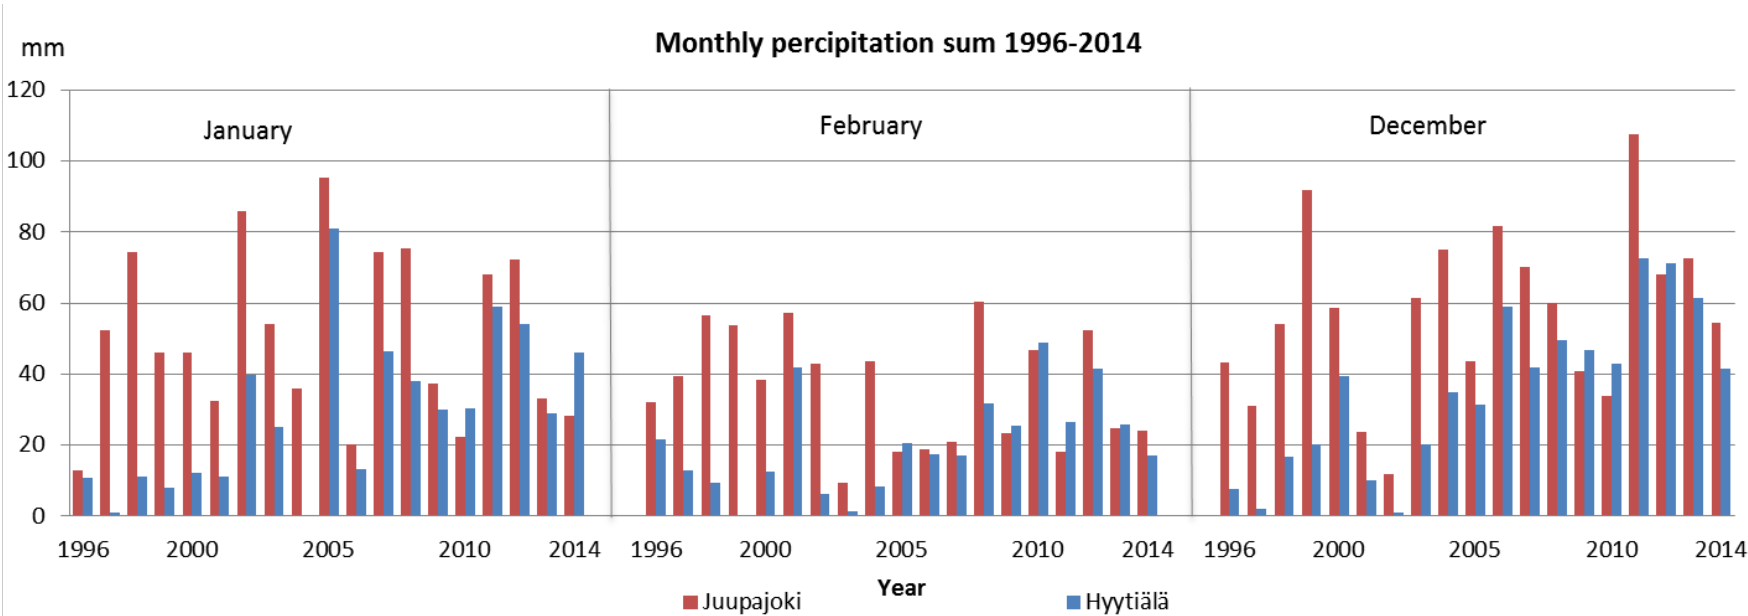

Figure S12 Monthly precipitation sum of the winter month 1996-2014. Comparison of the data from the observation station Hyytiälä and the nearby weather station of the Finnish Meteorological Institute Juupajoki (<https://en.ilmatieteenlaitos.fi/download-observations#!/>, download 23.02.2018). The distance between the two stations is about 300 m.

## 55 References

- 56 Badeck, F.W. et al., 2005. Adaptive Forest Management at the Scale of the Forest  
57 Management Units. In: S. Kellomäki and S. Leinonen (Editors), Management of  
58 European Forests under Changing Climatic Conditions. University of Joensuu, Faculty  
59 of Forestry, Joensuu, Fi, pp. 315 - 382.
- 60 Borys, A. et al., 2015. Ökonomische Analyse der Kohlenstoffsequestrierung in  
61 Buchenbeständen im Kontext von Waldpflege und Klimawandel. Allg. Forst- u. J. Ztg.,  
62 186(3/4): 72-84.
- 63 Borys, A., Lasch, P., Suckow, F. and Reyer, C., 2013. Kohlenstoffspeicherung in  
64 Buchenbeständen in Abhängigkeit von Waldpflege und Klimawandel. Allg. Forst- u. J.-  
65 Ztg., 184(1/2): 26-35.
- 66 Borys, A., Suckow, F., Reyer, C., Gutsch, M. and Lasch-Born, P., 2016. The impact of climate  
67 change under different thinning regimes on carbon sequestration in a German forest  
68 district. Mitig Adapt Strateg Glob Change, 21(6): 861-881.
- 69 Bugmann, H. et al., 2019. Tree mortality submodels drive simulated long-term forest  
70 dynamics: assessing 15 models from the stand to global scale. Ecosphere, 10(2):  
71 e02616.
- 72 Fürstenau, C. et al., 2007. Multiple-use forest management in consideration of climate  
73 change and the interests of stakeholder groups. European Journal of Forest Research,  
74 126(2): 225-239.
- 75 Gerstengarbe, F.-W. et al., 2003. Studie zur klimatischen Entwicklung im Land Brandenburg  
76 bis 2055 und deren Auswirkungen auf den Wasserhaushalt, die Forst- und  
77 Landwirtschaft sowie die Ableitung erster Perspektiven. 83, PIK, Potsdam.
- 78 Gutsch, M., Lasch-Born, P., Kollas, C., Suckow, F. and Reyer, C.O.P., 2018. Balancing trade-  
79 offs between ecosystem services in Germany's forests under climate change.  
80 Environmental Research Letters, 13(4): 045012.
- 81 Gutsch, M. et al., 2015a. Uncertainty of biomass contributions from agriculture and forestry  
82 to renewable energy resources under climate change. Meteorologische Zeitschrift,  
83 24(2): 1-11.
- 84 Gutsch, M., Lasch-Born, P., Suckow, F. and Reyer, C., 2015b. Modeling of Two Different  
85 Water Uptake Approaches for Mono- and Mixed-Species Forest Stands. Forests, 6(6):  
86 2125-2147.
- 87 Gutsch, M., Lasch-Born, P., Suckow, F. and Reyer, C.P.O., 2016. Evaluating the productivity of  
88 four main tree species in Germany under climate change with static reduced models.  
89 Annals of Forest Science, 73(2): 401-410.
- 90 Gutsch, M., Lasch, P., Suckow, F. and Reyer, C., 2011. Management of mixed oak-pine forests  
91 under climate scenario uncertainty. For. Syst., 20(3): 453-463.
- 92 Horemans, J., A. et al., 2017. Combining multiple statistical methods to evaluate the  
93 performance of process-based vegetation models across three forest stands. Central  
94 European Forestry Journal, 63(4): 153-172.
- 95 Kint, V., Lasch, P., Lindner, M. and Muys, B., 2009. Multipurpose conversion management of  
96 Scots pine towards mixed oak-birch stands--A long-term simulation approach. For.  
97 Ecol. Manage., 257(1): 199-214.

- 98 Kollas, C., Gutsch, M., Hommel, R., Lasch-Born, P. and Suckow, F., 2018. Mistletoe-induced  
99 growth reductions at the forest stand scale. *Tree Physiol*, 38(5): 1-10.
- 100 Kollas, C., Lasch, P., Rock, J. and Suckow, F., 2009. Bioenergy potential in Germany - assessing  
101 spatial patterns of biomass production with aspen short-rotation coppice.  
102 *International Agrophysics*, 23(4): 343-352.
- 103 Lasch-Born, P. et al., 2018. Fire, late frost, nun moth and drought risks in Germany's forests  
104 under climate change. *Meteorologische Zeitschrift*, 27(2): 135.-148.
- 105 Lasch-Born, P. et al., 2015. Forests under climate change: potential risks and opportunities.  
106 *Meteorologische Zeitschrift*, 24(2): 157-172.
- 107 Lasch, P., Badeck, F.-W., Lindner, M. and Suckow, F., 2002. Sensitivity of simulated forest  
108 growth to changes in climate and atmospheric CO<sub>2</sub>. *Forstwiss. Centralblatt*, 121,  
109 Supplement 1: 155-171.
- 110 Lasch, P., Kollas, C., Rock, J. and Suckow, F., 2010. Potentials and impacts of short-rotation  
111 coppice plantation with aspen in Eastern Germany under conditions of climate  
112 change. *Reg Environ Change*, 10(2): 83-94.
- 113 Lasch, P., Schröder, J., Suckow, F., Gutsch, M. and Degenhardt, A., 2009. Nutzung von  
114 Modellen zur Vorbereitung auf die Zukunft. In: M. Elmer et al. (Editors), *Nachhaltige  
115 Bewirtschaftung von Eichen-Kiefern-Mischbeständen*. Oekom Verlag, München, pp.  
116 119-135.
- 117 Lasch, P., Suckow, F. and Badeck, F.-W., 2007. Analyses of forest ecosystems' response to  
118 climate change at level II monitoring sites. In: J. Eichhorn (Editor), *Symposium:  
119 Forests in a Changing Environment - Results of 20 years ICP Forests Monitoring  
120 Göttingen*, 25.-28.10.2006. Schriften aus der Forstlichen Fakultät der Universität  
121 Göttingen und der Nordwestdeutschen Forstlichen Versuchsanstalt. J.D.  
122 Sauerländer's Verlag Frankfurt am Main, Göttingen, pp. 136-141.
- 123 Meiwes, K.-J. et al., 2007. Kohlenstoffumsatz in Waldökosystemen und deren Böden.  
124 Parametrisierung, Kalibrierung und Validierung von Modellen. *AFZ / Der  
125 Wald*(20/2007): 1076-1078.
- 126 Reyer, C. et al., 2014. Projections of regional changes in forest net primary productivity for  
127 different tree species in Europe driven by climate change and carbon dioxide. *Annals  
128 Of Forest Science*, 71(2): 211-225.
- 129 Reyer, C., Lasch, P., Mohren, G.M.J. and Sterck, F.J., 2010. Inter-specific competition in mixed  
130 forests of Douglas-fir (*Pseudotsuga menziesii*) and common beech (*Fagus sylvatica*)  
131 under climate change - a model-based analysis. *Annals Of Forest Science*, 67(8).
- 132 Reyer, C.P.O., Flechsig, M., Lasch-Born, P. and van Oijen, M., 2016. Integrating parameter  
133 uncertainty of a process-based model in assessments of climate change effects on  
134 forest productivity. *Clim. Change*, 137: 395-409.
- 135 Schelhaas, M.-J. et al., 2015. Alternative forest management strategies to account for  
136 climate change-induced productivity and species suitability changes in Europe. *Reg  
137 Environ Change*, 15(8): 1581-1594.
- 138 Seidl, R., Rammer, W., Lasch, P., Badeck, F.W. and M.J., L., 2008. Does conversion of even-  
139 aged, secondary coniferous forest affect carbon sequestration? A simulation study  
140 under changing environmental conditions. *Silva Fennica*, 42(3): 369-386.

- 141 Stojanović, D. et al., 2014. Impact of climate change and different management regimes to  
142 various ecosystem services in European beech forests in Serbia. CONTEMPORARY  
143 AGRICULTURE / SAVREMENA POLJOPRIVREDA, 63(312-325).
- 144 Suckow, F., Lasch-Born, P., Gerstengarbe, F.-W., Werner, P. and Reyer, C.P.O., 2016. Climate  
145 change impacts on a pine stand in Central Siberia. Reg Environ Change, 16(6): 1671-  
146 1683.
- 147 van Oijen, M. et al., 2013. Bayesian calibration, comparison and averaging of six forest  
148 models, using data from Scots pine stands across Europe. For. Ecol. Manage., 289:  
149 255-268.
- 150 Wechsung, F., Gerstengarbe, F.W., Lasch, P. and Lüttger, A. (Editors), 2009. Die  
151 Ertragsfähigkeit ostdeutscher Ackerflächen unter Klimawandel. PIK-Report, 112. PIK,  
152 Potsdam, 93 pp.
- 153 Yousefpour, R. et al., 2018. Realizing Mitigation Efficiency of European Commercial Forests  
154 by Climate Smart Forestry. Scientific Reports, 8(1): 345.

155
